# Supplementary material for: ‘Mystery big cats’ in the Peruvian Amazon: morphometrics solve a cryptozoological mystery
Source: PeerJ. 2014 Mar 6;2:e291. doi: 10.7717/peerj.291 (PMC3961146; doi:10.7717/peerj.291)
Supplement: Supplemental Information 2 — List of specimens used in comparisons, with raw cranial measurements (including missing values). [file peerj-02-291-s002.xlsx]

## Sheet: Raw_data_cranial
Raw cranial measurements of 341 specimens (including missing values)
specimen	Taxa	LSkT	LFr	LPa-Oc	Lface	Wiof	Wo	WPOC	WPOP	WBC	Wsn	WC1s	WNA	LN	LNT	WMFS	LCdBs	LBsCr	WIC1s	WI3s-I3s	LC1sP3s	Wsk	WP4s-P4s	Wpal	Lpal	LPMMX	WPN	WPN.ant	WMP	WPocP	dAB.ant	dAB.post	WOC	HOC	WFM	WFMV	LP4s
BMNH-1926.6.4.4	Acinonyx_jubatus	198	75	67	95	64	46	59	89	71	61	53	33	46	63	21	178	60	29	22	4.5	141	76	81	79	51	25	22	76	57	20	34	42	23	21	18	23.65
BMNH-1926.6.4.5	Acinonyx_jubatus	204	74	76	99	65	47	60	89	75	62	52	32	48	66	23	181	60	29	20	5.5	147	76	81	81	51	26	23	77	58	24	35	44	22	22	20	23.4
BMNH-1931.1.3.3	Acinonyx_jubatus	190	74	69	87	61	44	55	79	71	58	49	31	40	57	22	168	57	29	20	4.5	131	74	77	77	47	24	23	75	54	20	32	40	20	22	18	23.75
BMNH-1931.1.2.9	Acinonyx_jubatus	174	63	61	82	55	39	56	73	68	54	46	27	40	53	19	157	52	27	19	3	120	67	69	69	42	22	22	67	50	21	33	37	21	21	18	22.1
BMNH-1942.60	Acinonyx_jubatus	168	58	65	82	54	39	51	69	65	52	43	28	42	56	19	147	50	25	18	3	116	64	68	68	42	20	19	66	49	18	29	34	18	20	16	21.1
BMNH-1935.2.3.1	Acinonyx_jubatus	190	71	69	94	57	44	57	75	70	55	48	33	45	61	26	170	54	27	20	4	131	70	74	76	46	24	22	72	56	19	31	42	21	21	20	21.8
BMNH-1905.8.13.1	Acinonyx_jubatus	196	75	70	92	61	45	57	82	74	61	53	32	43	59	24	175	58	29	20	6	136	75	81	82	50	26	23	75	58	24	36	41	24	19	18	23.15
BMNH-39.536	Acinonyx_jubatus	183	60	74	88	59	43	58	81	72	56	48	29	42	58	20	163	54	28	20	4	128	70	75	75	50	24	24	69	50	19	31	35	21	20	18	23.4
BMNH-43.56	Acinonyx_jubatus	173	69	54	80	53	40	56	74	65	50	44	29	36	52	22	156	49	26	19	5	114	67	69	70	46	22	23	66	53	17	28	35	18	20	18	22.75
RCSOM-A125.21	Caracal_aurata	111	39	52	40	27	19	31	39	50	26	25	12	22	26	7	102	33	14	12	4.5	71	43	46	44	27	10	11	47	39	9	22	28	13	17	17	15.65
RCSOM-A125.2	Caracal_aurata	110	39	53	39	25	16	29	33	47	27	26	11	22	26	7	101	32	13	12	5	67	43	46	45	26	10	10	44	36	9	20	27	11	15	14	15
RCSOM-A125.23	Caracal_aurata	112	40	51	42	29	20	32	43	49	29	26	11	23	28	8	103	35	14	12	5	70	44	46	45	26	10	10	46	39	9	21	27	13	16	14	15.7
BMNH-25.10.7.13	Caracal_aurata	138	45	64	53	34	23	27	52	51	34	34	16	29	35	9	124	41	18	14	4	91	53	57	52	31	13	13	57	45	12	26	33	14	19	16	17.75
BMNH-1938.3.29.1	Caracal_aurata	143	48	64	53	34	25	27	49	51	35	33	15	28	34	11	131	46	18	13	8	91	50	54	57	32	13	12	58	46	12	26	31	13	18	18	16.4
RCSOM-A121.1	Caracal_caracal	117	44	51	45	35	24	30	43	50	34	30	14	25	30	10	107	36	18	13	4.5	84	50	53	47	29	15	16	52	40	12	21	27	13	16	14	16.5
RCSOM-A121.11	Caracal_caracal	111	37	49	41	31	23	30	44	47	31	29	12	24	30	9	103	32	14	13	4	79	48	52	45	25	11	11	48	37	11	20	26	10	14	12	15
RCSOM-A121.12	Caracal_caracal	122	45	53	48	35	26	33	44	50	36	31	12	27	32	8	113	36	18	13	4	86	51	53	49	27	13	14	53	40	14	23	27	13	15	14	15.65
RCSOM-A121.13	Caracal_caracal	140	49	62	53	37	28	32	58	53	37	33	15	30	37	11	126	42	18	15	6	101	53	57	54	32	14	14	56	44	12	25	29	14	17	14	16.75
RCSOM-A121.2	Caracal_caracal	113	43	48	45	32	21	32	41	51	32	29	13	25	31	9	104	34	15	13	3.5	76	48	50	45	26	14	15	50	41	13	22	28	13	16	14	16.25
RCSOM-A121.15	Caracal_caracal	104	34	52	41	31	21	34	43	47	29	25	12	24	29	9	95	31	15	11	5.5	70	42	47	40	22	13	14	44	36	11	19	25	12	13	11	12.4
RCSOM-A121.3	Caracal_caracal	114	44	50	43	30	23	30	44	51	31	28	12	24	30	9	104	34	16	12	5.5	78	45	48	46	28	12	12	50	40	10	22	27	12	16	14	15.05
RCSOM-A121.22	Caracal_caracal	102	40	48	39	30	17	32	38	49	29	27	11	23	27	6	94	31	14	12	3.5	70	44	48	41	24	13	13	46	39	11	20	28	11	15	15	16
RCSOM-A121.21	Caracal_caracal	114	43	52	43	33	22	31	43	52	32	29	12	25	30	11	104	35	16	12	4	80	46	49	46	25	13	14	50	40	12	23	30	NA	18	NA	14.8
RCSOM-A120.21	Felis_chaus	115	41	53	42	31	21	33	49	50	29	26	14	24	28	9	106	36	15	12	5.5	75	42	45	45	23	12	14	46	36	10	19	26	12	16	14	13.5
BMNH-19.7.7.3494	Felis_chaus	128	46	54	50	34	23	38	56	51	33	32	14	31	36	7	116	38	18	13	7	83	51	54	49	27	13	16	49	40	9	22	27	13	14	15	15.3
BMNH-92.5.22.1	Felis_chaus	114	41	51	46	30	21	37	NA	49	29	29	13	30	35	6	105	34	17	12	5	75	47	49	44	25	12	14	47	37	11	22	26	12	15	14	14.05
BMNH-1909.7.1.15	Felis_chaus	132	48	56	53	35	23	36	59	52	35	33	15	33	39	6	120	39	19	12	7.5	87	49	53	51	32	13	16	50	42	11	22	29	15	15	14	14.85
BMNH-1934.12.11.4	Felis_chaus	130	46	57	51	34	24	37	NA	50	34	32	14	30	35	7	119	39	18	12	6	83	49	53	48	26	13	15	48	39	11	22	27	13	16	16	16.05
BMNH-77.858	Felis_chaus	129	45	55	52	32	22	35	53	52	32	31	15	31	36	7	117	36	18	12	8	81	49	52	50	29	13	15	54	42	10	22	29	14	15	15	15.6
BMNH-32.2.1.76	Felis_chaus	130	45	54	52	35	23	36	55	51	32	31	14	29	37	6	118	38	18	12	8	83	49	50	49	27	12	15	51	42	10	22	28	13	15	14	14.95
BMNH-1936.4.14.35	Felis_chaus	138	47	61	55	37	26	35	61	52	36	35	15	33	40	7	123	38	19	13	6.5	90	53	55	52	29	14	17	53	42	9	24	29	14	17	15	15.9
BMNH-8.1.13.4	Felis_chaus	113	42	48	42	29	18	34	47	49	28	26	12	25	30	6	102	31	15	11	9	72	43	46	44	25	14	16	46	37	9	20	25	12	15	13	12.35
BMNH-4.6.1.1	Felis_chaus	109	41	48	42	29	18	33	46	47	25	25	11	25	29	6	100	32	14	11	8	69	40	43	42	23	11	13	44	36	6	18	25	12	15	13	12.9
BMNH-22.5.16.27	Felis_chaus	112	44	46	42	30	20	35	47	46	28	26	12	25	29	7	102	34	15	11	7	73	42	44	42	24	11	14	45	35	7	19	25	12	14	14	13.3
BMNH-29.10.19.1	Felis_chaus	120	44	53	47	31	22	35	55	48	28	27	11	28	33	6	107	34	16	11	9	76	41	44	44	25	11	14	46	35	9	18	24	12	13	13	12.3
BMNH-25.6.10.12	Felis_chaus	118	43	50	45	33	22	35	53	50	32	30	12	27	33	6	107	33	17	11	8	80	44	47	45	25	12	14	48	39	10	20	26	14	15	14	11.85
BMNH-12.6.28.11	Felis_chaus	103	39	43	41	27	17	34	47	47	27	26	11	25	29	6	94	32	15	11	6.5	66	38	40	40	23	12	13	44	34	10	19	25	12	14	13	11.4
BMNH-32.2.1.39	Felis_chaus	108	44	46	39	27	17	34	48	45	26	25	12	23	28	5	98	32	14	10	7	66	41	43	40	23	12	14	43	35	8	18	24	12	14	12	13.05
BMNH-32.2.1.64	Felis_chaus	106	40	42	40	26	17	33	47	46	24	23	11	23	28	5	99	32	14	11	9	67	40	42	41	23	11	13	43	32	9	19	24	11	13	13	11.65
BMNH-32.2.1.59	Felis_chaus	114	43	49	44	29	20	33	53	46	29	26	11	26	31	7	103	34	15	12	6.5	78	43	47	42	24	11	14	44	35	8	18	22	12	13	12	12.85
BMNH-14.8.22.17	Felis_chaus	100	39	43	35	28	19	34	48	45	25	24	11	20	24	5	91	29	14	11	7	68	40	43	37	21	10	13	42	33	9	18	22	11	13	11	11.4
BMNH-14.7.19.86	Felis_chaus	113	47	48	39	30	19	36	45	46	28	27	11	22	26	4	103	34	15	10	7	76	44	46	41	23	11	14	44	36	9	19	25	11	14	13	13.15
BMNH-1934.3.24.14	Felis_chaus	114	44	49	41	29	20	35	49	48	28	27	12	24	29	6	103	34	15	11	7	74	42	46	42	25	12	14	45	37	6	20	25	12	15	13	11.4
BMNH-67.1429	Felis_margarita	87	29	38	35	23	16	32	47	42	22	20	9.9	22	26	6	81	27	11	6.9	4.7	64	32	35	30	20	8.7	10	40	33	4.7	16	20	9.4	13	11	10.5
BMNH-59.634	Felis_margarita	89	28	41	37	26	19	31	52	43	25	24	9.4	23	27	5.6	85	29	15	8.1	5.05	74	38	42	32	21	9.8	11	45	35	5.7	16	20	10	12	11	10.95
BMNH-2.12.1.5	Felis_nigripes	77	34	34	27	21	15	32	42	41	22	19	8.4	16	20	2.7	71	24	12	7.4	5.4	58	32	34	28	15	8.3	10	37	28	7.2	15	19	8.5	13	9.6	9.45
BMNH-39.679	Felis_nigripes	72	30	32	24	20	14	30	38	39	20	18	7.5	15	18	2.6	68	23	11	8.2	4.25	53	31	33	27	15	7.6	9.7	35	27	5.7	14	18	7.3	12	9.6	9.25
BMNH-2.12.1.4	Felis_nigripes	77	33	33	27	21	15	31	40	41	21	19	7.8	16	19	2.1	70	23	12	7.8	5.15	57	32	33	28	15	8.8	11	36	28	6.5	13	19	8.4	12	11	9.5
HM-NH.35.95	Felis_silvestris	86	31	39	32	23	17	34	47	43	22	21	10	21	22	5	79	25	13	9	5.35	61.5	35	38	32	19	10	11	39	28	8.5	16	22	9	14	12	9.45
BCMAG-Af1371	Felis_silvestris	89	29.6	42.2	33.4	24.2	16.5	28.3	47.3	40.6	23.7	23	9.3	20.5	25	3.9	82.8	26.2	13.2	9.1	6.05	61.2	35	39	35.5	19.5	10.5	11	38.5	31.5	9	15	20.2	9	12.5	10.5	10.65
BCMAG-Af1374	Felis_silvestris	81.9	21.7	40	32.7	21.9	14.8	30.6	43.8	39	21.8	20.7	8.8	21.7	26	4.1	76.7	25.5	12.8	9.5	4.65	56.1	34.5	36.6	31.4	18.3	9.4	9	38.9	30	9	16	20.5	8.3	12.7	10	9.95
BCMAG-Af1382	Felis_silvestris	85	33.8	40.5	28.9	23.4	16.4	31	45.2	40.4	23	21	8.7	18	22	4.8	78	25.3	12.8	9.3	6.15	56.4	35.2	38	32.6	19.7	11	12	38.3	31.6	9	18	20.7	9.3	13.5	11	9.85
BCMAG-Af1384	Felis_silvestris	88.4	31	39	34	23.4	15.9	30.9	44.2	42	22	20	NA	21.2	24	5.2	87.5	24.2	12.4	8.8	7.45	60.7	33.8	36	34.1	19.3	10.6	11	37.9	31.6	10	17	21.7	8.3	13.9	12	9.35
BCMAG-Af1385	Felis_silvestris	88.1	28	42	34	24.6	17.5	31.1	44.6	42.7	24	22.5	NA	22.2	26	4.8	79.9	25.6	13.2	9.5	5.75	63.5	37.2	38.3	33	19.9	11	11	40.3	32.5	9	17	22.2	9.4	14.3	12	10
BCMAG-Af1386	Felis_silvestris	76.5	28.4	37.8	28.3	19.4	13.3	30.6	37.7	38.8	19.5	17.9	7.9	17.4	21	3.3	69.6	22.1	9.7	8.2	3.65	50.7	31.3	34	29.5	16.1	8.6	9	35.4	27.9	8	16	20.5	8.8	12.2	10	NA
BCMAG-Af1387	Felis_silvestris	79.6	25	40	27.3	22.1	14.2	28.3	41	38.8	21.7	20.6	8.4	18.6	21	3.5	72.4	23.8	11.4	9.9	3.05	55.9	33.5	36.3	28.5	16.1	8.4	8.5	36.3	28.8	9	16	20.3	8.6	12.8	11	NA
BCMAG-Af1388	Felis_silvestris	NA	28	NA	30.1	23.3	14.7	31	40.7	41.8	23.3	22.8	8.5	18.8	22	3.9	NA	NA	13.2	10.4	5.05	57.2	35.3	39.4	32	20	10.5	11	38.2	NA	8	NA	NA	NA	NA	NA	9.85
HM-NH.74.5.15	Felis_silvestris	98	31	47	38	28	19.5	30	53	43	27	25	10	23	27	7	90	30	15	11	6.85	72	40	46	39	22	10	13	45	33	9	19.5	23	9	13	13	10.5
HM-NH.74.5.16	Felis_silvestris	99	32.5	45	37	26	20	31	51	45	26	25	10	24	27	6	92	30	15	10	6.35	71	39	44	38	22	11	13	43	34	10	17.5	24	10	14	12.5	10.95
HM-NH.74.5.20	Felis_silvestris	88	30	43	31	26	17	32	46	42	25	24	9	20	22	4	80	NA	14	11	5.1	62	37	41	33	19	10	12	40	31	9	16	21	9	12	11.5	9.85
HM-NH.74.5.22	Felis_silvestris	98	32	44	36	27	19	29	52	42	27	25	10	23	26	6	90	29	15	10	6.05	71	39	44	36	22	11	12	43	33	9	17	22	11	13	12	10.15
HM-NH.74.5.23	Felis_silvestris	98	32	46	36	28	19	31	50	42	28	24	10	24	27	7	91	30	15	10	7.45	68	40	44	40	23	11	12	42	35	9	17	24	11	13	12	9.95
HM-NH.74.5.27	Felis_silvestris	86	27	41	33	23	16	28	42	41	23	22	9	21	24	5	78	24	13	9	5.35	62	36	40	32	19	10	11	39	28	9	17	22	9	14	12	10.8
HM-NH.74.5.29	Felis_silvestris	89	35	42	31	24	17	32	47	40	24	20	10	19	22	5	82	27	12	8	7.35	60	35	39	34	20	9	10	38	29	6	15	22	10	13	12	9.8
BRSUVA-Cat-CHAIRO	Felis_silvestris	97	33	45	34	29	19	34	52	44	29	26	11	19	21	7	90	29	16	9.8	6.4	70	40	44	38	22	10	11	43	34	10	18	23	11	13	11	9.5
BRSUVA-T.1.543	Felis_silvestris	98	30	46	39	28	19	31	51	44	28	25	10	25	28	6	90	28	15	10	5	70	42	45	36	22	11	12	44	34	9	17	24	10	14	13	11.2
BCMAG-Ab4632	Felis_silvestris	86	33	38	30	23	17	30	42	41	23	22	9	17	20	5.5	81	26	13.5	10	5.7	58	34	36	33	20	10	11	39	31	8	16	21	10.5	13.5	11	9.75
BCMAG-Ab4598	Felis_silvestris	97	34	45	36	29	19.7	35.2	47.6	46	29	24	11.2	23	28	6	89.5	30	15.8	10	5.85	68	39.7	42	37	21	11.2	11	44	33	10	22	24.7	9	15	12.5	11.05
BCMAG-Ab4631	Felis_silvestris	103	39.2	44.7	39	27	18	30	48	45	25	24	11	24	27	6	95	32	14	10	7.4	65	39	42	38	21	11	12	42	NA	8	18	24	9	16	13	11
BCMAG-Af1372	Felis_silvestris	92	28.8	44.9	35	25	17.3	30	51.8	39.7	25	23	10.2	20.9	26	4.3	84	26	14	9.8	6.05	66	36.6	42	35	19	10.5	12	40.6	30.8	8.5	17	20	9	12	11	10
BCMAG-Af1373	Felis_silvestris	92.6	33.8	42	32.4	25.6	18	32.5	48.5	42.5	25	21	9.9	20	23	6	87	28	12	9.8	7	66	37.7	40	35	NA	11	11	43	33	9	18	23	10	13.7	13	11
BCMAG-Af1383	Felis_silvestris	93.4	32.1	42.2	36.3	25.5	18.7	32.2	48.4	42.9	25.7	23.8	10.2	22.4	27	5.1	86.8	28.4	13.9	11.2	5.65	65.5	36	40	36.8	22	10.3	11	42.8	33	8	17	21.6	9.5	13.3	12	10.65
HM-NH.35.92	Felis_silvestris	100	29	48	38	28	18	31	52	44	26	24	11	24	28	6	91	31	15	10	7	69	39	41	39	24	11	11	45	32	11	18	21	10	14	12	10.75
RCSOM-G16.24	Felis_silvestris	92	30	44	35	26	18	35	48	45	26	22	9	22	25	6	85	29	13	9	5.5	65	39	41	36	20	10	12	40	30	8	20	22	10	13	12	10.8
RCSOM-A120.1	Felis_silvestris	95	34	43	32	23	15	24	43	39	23	22	9	19	23	6	88	31	13	10	7	63	36	39	38	20	8	9	39	31	7	17	20	11	NA	NA	10.05
RCSOM-A120.12	Felis_silvestris	89	33	42	32	26	18	35	45	45	26	22	9	21	22	6	83	27	13	9	5.5	62	38	40	34	20	10	10	42	31	9	20	25	10	14	13	10.2
RCSOM-A120.13	Felis_silvestris	98	36	42	36	29	19	32	50	47	28	25	9	23	27	6	92	32	14	9	6	70	40	43	39	23	10	11	44	33	11	23	25	11	16	14	11.1
RCSOM-G70.5	Felis_silvestris	98	35	43	38	30	19	33	51	48	29	26	10	23	26	5	90	30	15	10	6	71	41	45	40	22	11	12	45	33	10	22	25	10	14	14	11.2
BCMAG-Af926	Felis_silvestris	94	33	43	34	28	19	34	NA	47	27	24	11	21	NA	7	86	29	14	10	5.5	67	41	42	37	20	10	11	43	33	10	22	24	10	13	12	10.95
BCMAG-Ab2797	Felis_silvestris	96	34	44	35	27	16	31	49	44	27	24	10	22	26	5	88	30	15	10	5.6	67	38	41	39	21	10	11	44	36	8	21	24	11	13	12.5	10.75
BCMAG-Ab4630	Felis_silvestris	NA	34	NA	36	27	18	33	46	44	26	22	10	22	24	6	NA	NA	13.5	9	5.75	66	38	41	37	21	10	11	NA	NA	NA	NA	NA	NA	NA	NA	10.5
BCMAG-Ab4629	Felis_silvestris	NA	35	NA	38	30	19	34	49	49	29	25	11.5	23	26	6	NA	NA	15	9	6.5	73	43	44	39	21	11	12	NA	NA	NA	NA	NA	NA	NA	NA	11.6
BCMAG-Ab1536	Felis_silvestris	NA	NA	NA	37	30	20	36	53	NA	30	26	12	22	26	6	NA	NA	15	11	6.5	72	42.5	45	40	24	10	13	NA	NA	10	NA	NA	NA	NA	NA	11.1
BMNH-1901.11.18.1	Leopardus_colocolo	110	41	52	39	31	22	31	47	47	29	27	11	22	27	4	100	37	16	10	6	80	43	46	41	24	12	12	47	34	12	20	23	11	14	13	11.3
BMNH-1901.12.27.1	Leopardus_colocolo	103	41	44	35	27	19	30	40	45	27	26	11	19	24	3	95	33	15	10	4	71	40	42	40	21	11	11	45	34	11	19	24	11	14	13	11.8
BMNH-1927.11.1.67	Leopardus_colocolo	92	37	41	31	25	17	27	44	43	24	22	10	17	21	4	84	29	14	9	3.5	66	37	39	34	18	10	10	41	31	10	18	22	10	13	12	11.4
BMNH-1908.4.13.1	Leopardus_colocolo	108	43	49	36	31	21	29	41	47	29	27	12	19	25	3	100	36	16	10	5.5	78	43	46	41	23	11	12	48	35	11	20	24	11	14	13	12.2
BMNH-1921.6.7.3	Leopardus_colocolo	105	39	47	34	25	21	29	47	48	25	24	11	17	23	6	95	35	13	11	3	73	38	42	40	22	10	10	44	35	10	20	27	12	15	14	13.45
RCSOM-G16.3	Leopardus_geoffroyi	93	36	43	31	22	17	27	41	43	22	21	10	16	20	5	87	32	12	10	6	62	35	37	36	20	9	9	40	32	8	17	25	12	16	13	11
BMNH-1913.8.14.1	Leopardus_geoffroyi	117	42	49	43	27	23	28	52	44	30	29	13	25	30	6	109	38	17	12	5.5	79	42	47	45	25	10	10	49	38	10	23	28	12	16	13	13.4
BMNH-1917.1.25.2	Leopardus_geoffroyi	104	35	44	39	26	17	25	40	45	27	25	11	23	28	5	95	33	14	11	4	66	38	42	41	23	10	10	44	34	10	20	27	12	15	15	12.95
BMNH-1909.12.1.9	Leopardus_geoffroyi	113	41	50	40	27	22	28	51	46	29	27	12	21	28	6	103	38	17	12	6	75	41	45	45	24	11	11	47	36	10	22	28	13	15	14	13.2
BMNH-12.11.15.1	Leopardus_geoffroyi	102	38	45	36	24	18	27	41	45	24	23	11	21	25	5	95	34	13	11	5	66	38	40	39	21	11	11	43	35	10	22	25	12	15	13	12
BMNH-1909.12.1.8	Leopardus_geoffroyi	111	36	49	38	27	20	25	41	47	29	26	13	20	24	7	103	38	15	12	5	71	42	45	43	23	12	11	49	38	10	23	26	13	15	14	12.7
BMNH-1921.4.8.1	Leopardus_geoffroyi	90	32	42	31	23	16	26	36	43	23	21	10	16	21	5	84	29	13	10	4	59	34	36	34	19	9.4	8.5	38	30	8	18	24	10	14	11	12
BMNH-1917.1.25.3	Leopardus_geoffroyi	92	33	41	30	23	17	27	40	43	23	21	10	15	21	5.5	86	30	13	10	4.85	62	35	37	36	20	11	9.5	40	31	10	19	23	10	15	12	11
BMNH-1837.5.13.94	Leopardus_geoffroyi	116	41	50	43	29	20	31	46	48	29	26	12	23	28	6.1	108	41	15	12	4.8	76	43	46	43	24	12	13	45	39	11	22	27	12	15	13	13.15
BMNH-1903.7.9.1	Leopardus_guigna	84	33	40	25	21	16	28	35	39	20	19	9	12	16	5	78	27	12	8	5	52	31	34	31	17	8	8	34	28	6	20	21	10	14	12	9.25
BMNH-1905.2.4.1	Leopardus_guigna	86	34	42	27	21	15	25	NA	39	20	19	10	13	17	4	79	29	11	8	4	54	30	31	32	17	8	8	35	28	7	19	22	10	13	12	9.5
BCMAG-Ab2160	Leopardus_pardalis	129	46	52	47	31.5	22	25	57	51	33	32	15	26	33	6	119	42	19	14	6.25	84	46	50	52	31	11	12	53	43	11	25	29	15	17.5	16	14.65
BCMAG-Af1355	Leopardus_pardalis	121	45	51	44	31	25	29	50	48	30	29	11	22	29	6.5	113	39	17	14	5.75	83	45	51	48	27	12	12	51	36	12	22	28	11	16	13	14.45
BCMAG-Af1356	Leopardus_pardalis	145	54	60	54	33	26.5	32	71	52	34	35	15	29	36	6	133	38	20	17	7.9	97	51	56	57	33	9	13	60	48	13	26	33	16	18	18	16.3
BCMAG-Af1380	Leopardus_pardalis	137.5	46	57	54	34	26.4	28.5	50	51	35	34	15	29	37	9	133	46	19	15	6.9	91	52	56	56	31	13	14	60	46	11	27	33	14	18	17	16.75
BCMAG-Af1381	Leopardus_pardalis	136	49	58	53	35	27	34	55	54	35	34	16	30	35	6	123	42	19	16	5.9	89	48	52	54	30	13.5	13	57	43	11	23	32	14	17.5	17	15.5
HM-NH.70.4B	Leopardus_pardalis	130	43	60	49	33	22	26	44	51	33	30	15	26	31	8	120	40	16	13	5.4	84	49	52	51	28	12	12	55	43	11	24	31	13	19	16	16.5
RCSOM-A127.12	Leopardus_pardalis	125	42	56	49	34	21	32	47	52	32	30	15	29	35	8	114	39	16	13	6.5	83	49	52	50	27	14	15	50	39	13	21	28	14	16	14	14.65
RCSOM-A127.2	Leopardus_pardalis	128	44	56	45	36	25	30	50	49	37	35	12	23	30	7	119	38	17	16	3.5	86	51	55	50	31	11	13	54	42	12	22	29	14	15	14	17.5
RCSOM-G70.7	Leopardus_pardalis	120	40	51	49	31	24	31	50	48	32	32	12	28	34	7	114	40	18	15	6	88	49	53	48	28	9	10	54	41	12	22	28	13	15	12	13.95
BMNH-1904.12.4.5	Leopardus_pardalis	153	53	67	57	35	26	27	57	57	38	35	16	30	39	6	139	47	20	15	6	108	56	63	57	36	13	13	61	47	17	26	32	15	18	16	17.3
BMNH-1926.12.4.28	Leopardus_pardalis	131	51	57	47	30	22	29	48	49	31	30	12	25	31	6	119	40	16	14	5	80	47	51	50	30	12	12	53	42	12	26	30	14	16	14	15.1
BMNH-1914.4.25.48	Leopardus_pardalis	158	46	79	58	36	28	27	57	54	38	38	14	31	39	7	142	51	22	16	6.5	106	55	60	61	38	12	13	62	45	16	27	33	15	18	17	17.05
BMNH-1899.8.1.28	Leopardus_pardalis	124	45	50	45	31	24	34	48	51	32	31	13	25	30	9	119	41	17	14	4	80	47	50	49	29	12	13	54	42	13	25	31	15	17	16	15.8
BMNH-1933.6.12.1	Leopardus_pardalis	149	52	64	57	39	30	29	61	53	42	42	17	27	35	10	138	45	20	18	6	101	53	60	62	37	11	12	58	44	14	27	30	14	16	15	16.9
BMNH-1915.2.15.1	Leopardus_pardalis	129	43	61	48	30	23	31	54	49	31	31	14	28	34	7	118	41	18	14	6	86	50	54	49	27	11	11	54	43	11	23	28	13	14	12	15.1
MS-Ocelot	Leopardus_pardalis	133	45	54	50	34	24	26	57	50	33	34	15	28	36	7	121	40	19	15	7.25	91	49	50	48	31	9	9	57	43	16	24	28	14	16	14	14.9
HM-NH.35.87	Leopardus_tigrinus	91	36	42	31	23	16	31	43	45	22	21	10	17	22	4.5	84.5	29.5	12	9.7	5.1	58.6	34	35	33	19	8	8.5	40	30	8	19	24	10	15	13	10.65
RCSOM-G70.3	Leopardus_tigrinus	80	32	37	26	18	14	27	33	38	18	17	8	15	NA	4	73	27	10	8	4	53	30	32	28	16	8	7	34	28	8	16	21	10	12	10	9.25
BMNH-1903.7.1.11	Leopardus_tigrinus	95	37	44	31	23	16	26	40	42	22	21	10	18	22	5	90	33	13	10	5	60	33	35	37	20	10	10	37	31	9	20	25	12	15	14	10.35
BMNH-63.1211	Leopardus_tigrinus	87	32	39	29	20	14	26	39	40	19	18	10	17	20	5	82	30	12	9	5	59	31	34	32	17	9	7	35	27	8	17	22	11	12	11	9.3
BMNH-1884.2.8.3	Leopardus_tigrinus	86	35	37	27	20	14	28	35	42	20	19	10	15	18	4	81	30	12	10	3.75	54	32	34	31	17	9	8	36	28	7	18	22	10	14	13	10.15
BMNH-29.6.6.1	Leopardus_tigrinus	89	32	42	31	22	16	28	36	42	22	20	11	17	21	5	82	28	12	10	4.25	55	33	36	33	18	10	10	37	28	10	20	22	10	13	12	10.1
BMNH-1898.7.1.2	Leopardus_tigrinus	90	36	40	30	21	16	29	40	39	21	19	10	16	20	5	84	30	12	9	6	56	30	33	34	18	9	9	34	27	10	21	23	11	14	13	8.9
BMNH-98.3.2.16	Leopardus_wiedii	96	40	42	33	24	17	31	50	43	23	22	10	17	21	6	90	31	14	10	5	67	33	37	36	20	10	10	43	32	9	19	23	11	14	12	10.2
BMNH-1855.12.26.175	Leopardus_wiedii	93	37	41	31	23	16	30	46	43	22	21	11	16	20	5	86	31	13	10	6	62	33	35	34	19	9	9	42	33	10	17	23	10	13	12	10.3
BMNH-1858.5.4.71	Leopardus_wiedii	98	40	44	34	26	17	33	50	43	24	23	10	19	24	3	90	31	13	10	4	66	36	39	35	19	10	9	43	34	10	18	22	9	13	11	11.55
BMNH-1914.5.28.9	Leopardus_wiedii	103	42	42	35	26	20	31	47	47	25	24	12	17	22	6	99	34	14	12	5	65	37	41	39	22	9	10	43	34	10	22	25	10	15	14	12.5
BMNH-1908.6.17.9	Leopardus_wiedii	101	42	45	35	26	20	35	53	45	25	23	10	18	23	5	95	33	14	11	5	66	36	39	38	23	9	9	41	34	7	17	23	11	14	13	11.7
BMNH-26.1.12.5	Leopardus_wiedii	98	39	42	35	24	18	35	52	44	24	23	12	17	22	6	93	32	14	11	5	69	36	39	38	22	10	9	43	32	11	21	23	9	15	12	10.65
BMNH-1922.5.29.3	Leopardus_wiedii	90	39	40	29	24	16	30	42	44	23	22	10	15	18	5	85	30	13	10	5	59	34	36	32	18	10	9	40	29	10	20	22	10	14	12	10.3
BMNH-1913.12.18.2	Leopardus_wiedii	93	35	42	32	24	16	34	48	44	23	22	10	17	20	4	87	31	13	10	5	63	33	35	36	20	9	9	41	32	8	16	23	10	14	13	10.35
HM-NH.36.18	Leptailurus_serval	127	42	53	47	34	23	33	52	48	33	32	13	30	33	10	118	40	19	13	7.5	85	48	53	50	26	15	16	51	39	12	23	27	13	15	13	14
RCSOM-A124.31	Leptailurus_serval	114	37	52	42	32	21	30	NA	48	31	28	12	25	29	7	105	34	16	11	6	76	45	47	44	24	14	14	45	38	8	18	28	14	16	14	13.85
RCSOM-A124.3	Leptailurus_serval	126	43	56	48	34	23	32	50	55	33	30	14	28	33	11	114	38	17	12	6	80	47	49	49	27	12	15	48	39	10	21	28	14	16	14	15.05
RCSOM-A124.2	Leptailurus_serval	119	43	52	44	33	24	35	49	53	33	29	14	27	33	10	NA	36	18	13	6	81	46	50	48	26	14	15	49	39	11	21	28	14	18	NA	14.1
RCSOM-A124.12	Leptailurus_serval	113	41	51	40	28	22	34	54	49	28	27	13	23	27	8	106	36	16	13	5	79	41	47	44	24	11	12	50	40	12	22	28	12	16	14	12.6
RCSOM-A124.11	Leptailurus_serval	127	41	56	49	35	23.5	34	51	53	33	31	14	30	35	11	115	38	17	13	8	81	49	52	49	27	14	16	49	41	11	23	28	13	15	14	14
RCSOM-A124.1	Leptailurus_serval	124	41	55	47	34	21	30	48	49	31	29	14	30	35	9	116	40	16	12	7	82	47	50	49	27	14	15	47	40	11	20	27	12	16	14	14.4
RCSOM-G80.11	Leptailurus_serval	135	48	61	50	39	26	32	NA	53	37	33	15	29	34	10	121	42	20	14	7	89	50	55	52	28	16	17	52	40	12	24	28	14	16	15	15.35
BMNH-99.10.23.3	Leptailurus_serval	127	43	58	47	35	24	36	53	53	33	30	14	29	33	10	116	38	18	12	7	87	48	52	50	28	14	15	52	44	11	24	28	13	15	15	14.9
BMNH-50.2042	Leptailurus_serval	123	43	56	45	33	23	27	57	50	32	31	15	27	32	11	113	38	18	12	7	86	47	52	48	27	14	15	50	41	12	24	29	13	15	15	12.5
BMNH-9.11.2.4	Leptailurus_serval	112	36	50	45	32	20	33	47	47	31	27	15	27	30	8	105	36	16	12	5	74	43	47	44	23	14	15	46	38	11	20	26	12	15	14	14
BMNH-9.11.2.5	Leptailurus_serval	112	38	50	44	30	20	31	43	49	30	27	13	27	32	8	104	36	15	12	6	70	43	46	44	23	13	13	46	39	11	21	28	14	15	13	13.25
BMNH-11.1.12.1	Leptailurus_serval	114	39	52	43	32	22	35	52	49	29	27	13	26	30	10	105	34	16	11	6	84	46	51	44	24	12	13	48	35	13	22	27	12	15	13	12.6
BMNH-1937.2.24.27	Leptailurus_serval	126	43	56	48	34	24	36	54	54	32	31	15	29	35	9	116	40	17	12	8	89	47	51	49	28	14	15	50	42	12	23	29	14	16	15	13.2
BMNH-66.36	Leptailurus_serval	119	41	51	47	33	22	33	51	51	32	30	15	28	34	9	111	36	18	12	6.5	83	47	51	48	25	14	15	51	42	13	23	29	15	16	13	13.45
BMNH-70.679	Leptailurus_serval	120	39	54	43	31	23	35	51	51	30	27	13	26	32	9	110	39	16	11	6	80	45	48	43	24	14	15	48	39	10	22	27	14	15	14	13.9
RCSOM-A122.2	Lynx_canadensis	127	47	53	51	37	28	40	56	57	34	33	17	28	36	11	115	37	19	12	7	87	53	55	50	30	14	14	52	43	14	26	30	12	16	14	16.2
RCSOM-A122.3	Lynx_canadensis	133	52	51	53	40	31	40	60	60	37	35	18	30	38	14	122	38	21	13	7	92	55	57	53	31	15	18	56	45	15	28	32	15	17	17	16.4
RCSOM-G16.32	Lynx_canadensis	135	53	55	52	41	33	39	63	57	39	36	19	29	36	14	124	40	22	13	8	100	55	58	53	32	13	15	56	43	16	29	31	13	16	16	16.2
BMNH-62.12.12.29	Lynx_canadensis	123	43	55	49	36	26	38	53	56	35	33	17	28	35	11	114	37	20	13	6	87	52	54	48	29	13	14	52	41	15	27	31	14	17	16	16.05
BMNH-1989.377	Lynx_canadensis	129	52	52	49	38	29	40	60	58	36	34	16	27	34	11	118	39	20	13	6	92	55	58	50	31	14	17	55	44	15	28	31	14	17	15	16.65
BMNH-63.2.24.40	Lynx_canadensis	129	49	52	50	39	30	43	62	59	37	35	18	27	32	14	118	38	21	13	5.5	92	56	59	51	31	14	16	56	45	15	28	32	15	17	16	16.25
BMNH-1.6.29.1	Lynx_canadensis	130	49	53	51	40	30	39	60	58	37	35	NA	29	NA	12	118	35	21	13	5.5	94	56	58	53	32	14	17	55	45	14	27	32	15	17	16	16.25
BMNH-92.4.19.1	Lynx_canadensis	138	52	54	54	40	31	40	61	60	38	35	18	29	38	13	NA	40	21	13	8	96	56	61	54	34	14	17	58	45	16	28	NA	NA	19	NA	16.55
BMNH-85.804	Lynx_canadensis	128	46	53	50	39	29	39	60	57	36	34	16	28	36	11	118	39	20	13	6	95	54	57	49	29	16	17	56	44	15	28	31	15	16	16	15.75
BCMAG-Ab4458	Lynx_canadensis	130	54	51	47	38	30	34	57	57	35	35	18	27	34	13	119	44	21	15	5.45	93	55	57	49	31	14	15	56	42	15	26.5	30	13	16	14	15.5
RCSOM-A122.1	Lynx_lynx	146	49	60	60	42	34	41	73	57	40	38	19	36	44	12	130	40	23	17	7	101	57	62	58	36	15	17	65	51	18	29	33	15	17	16	18.05
RCSOM-A122.11	Lynx_lynx	135	50	55	55	42	30	43	60	58	42	38	17	32	40	14	124	40	21	17	4	97	62	64	54	33	14	17	60	46	15	29	31	15	16	15	19.3
BMNH-83.4.21.1	Lynx_lynx	141	49	57	60	43	32	41	65	61	41	38	18	33	41	15	127	41	21	16	6	102	60	64	56	36	15	17	63	47	17	32	32	15	17	16	18.75
BMNH-85.803	Lynx_lynx	123	42	57	51	37	25	38	57	56	37	34	16	29	36	12	111	34	17	17	3	86	56	58	50	31	15	16	58	46	17	29	32	14	16	17	18.05
BMNH-98.8.5.1	Lynx_lynx	148	53	59	60	42	33	42	NA	60	43	39	20	35	40	16	133	40	23	15	5.5	107	63	64	58	36	16	19	64	49	18	31	32	16	17	14	19.05
BMNH-1230c	Lynx_lynx	147	49	59	60	44	34	42	71	62	43	40	18	34	43	16	131	43	23	17	6	108	61	64	58	37	16	16	64	49	19	33	33	15	17	15	19.4
BMNH-55.12.26.176	Lynx_lynx	150	53	60	62	44	30	39	66	58	42	41	19	34	45	16	136	44	22	16	6.5	103	63	65	59	37	17	20	64	50	16	30	31	14	17	15	18.9
BMNH-69.10.19.16	Lynx_lynx	142	52	59	58	42	30	38	66	58	41	38	22	32	42	15	126	41	21	16	6.5	99	59	61	56	35	14	17	62	49	17	29	32	16	17	15	17.9
BMNH-58.5.4.63	Lynx_lynx	141	48	57	56	42	28	35	56	57	41	38	18	32	39	14	128	39	21	17	6	96	58	61	56	34	17	17	62	51	16	28	31	14	17	16	16.95
BMNH-42.41	Lynx_lynx	146	52	60	58	44	32	41	72	60	42	40	18	33	42	17	134	43	24	17	8.5	107	62	66	58	36	16	19	65	50	16	30	33	16	17	14	17
HM-NH.74.5.25	Lynx_pardinus	100	39	50	38	30	20	39	44	53	30	27	14	NA	NA	8	90	29	14	13	5.7	72	45	48	41	24	12	12	47	38	13	23	28	11	16	15	NA
BMNH-95.9.4.1	Lynx_pardinus	132	49	52	53	39	31	42	63	57	36	35	19	31	40	13	120	40	19	14	6	92	52	54	54	34	16	17	57	45	15	27	30	14	17	15	15.1
BMNH-55.12.26.179	Lynx_pardinus	132	46	51	54	39	30	43	64	56	37	36	16	31	39	12	119	38	20	16	4	97	56	58	53	33	16	18	58	45	16	26	30	14	17	NA	15.85
BMNH-4.12.12.1	Lynx_pardinus	136	50	50	54	38	31	41	67	58	36	35	18	31	38	13	124	41	21	14	6.5	98	54	57	55	34	16	17	60	47	14	28	31	15	18	16	15.3
BMNH-39.3664	Lynx_pardinus	123	46	51	49	36	29	43	61	57	34	31	17	30	36	12	108	35	18	13	6.5	90	50	51	49	30	15	16	55	44	15	26	29	13	17	14	14
BMNH-1903.3.16.1	Lynx_pardinus	139	51	55	58	38	32	40	57	57	37	35	20	30	39	14	124	40	20	15	6	97	53	57	54	34	16	18	61	46	16	28	31	15	16	16	15
BMNH-19.4.2.1	Lynx_rufus	134	51	55	51	36	24	36	61	53	36	34	16	29	34	9	125	40	20	13	6.5	94	58	57	55	33	14	16	58	45	11	25	31	13	17	15	14.8
BMNH-1227.a	Lynx_rufus	121	49	48	44	32	21	36	54	51	32	30	14	24	30	9	111	37	18	11	5	79	46	49	48	28	12	13	49	40	11	24	28	13	16	14	13.5
BMNH-43.5.27.5	Lynx_rufus	120	47	51	45	32	23	41	58	51	33	31	15	25	31	8	110	36	19	13	6	80	47	49	48	29	13	14	50	40	12	24	28	12	17	13	13.4
BMNH-94.5.9.2	Lynx_rufus	123	47	54	46	33	23	42	61	56	33	30	14	24	30	9	112	36	18	12	6.5	87	50	53	50	30	13	14	54	43	14	23	28	13	16	15	14.25
BMNH-82.10.26.10	Lynx_rufus	131	47	58	48	35	26	39	60	52	36	33	17	27	33	12	120	39	20	13	8	92	50	55	51	31	13	16	55	43	13	27	30	14	17	15	13.6
BMNH-88.11.25.1	Lynx_rufus	128	50	59	47	36	25	41	62	55	35	32	17	26	33	11	115	38	19	13	6	88	47	50	50	29	13	14	57	46	14	26	31	13	18	16	13.45
BMNH-57.6.22.6	Lynx_rufus	124	48	54	47	35	23	38	60	54	34	32	15.34	27	32	8	111	37	19	12	5	86	49	53	49	30	14	15	58	44	15	27	31	15	17	16	14.3
BMNH-13.8.2.1	Lynx_rufus	112	42	50	42	32	23	39	57	51	31	26	13	24	29	8	102	33	17	12	7	81	44	47	44	26	13	13	49	39	14	24	26	12	16	14	13.25
BMNH-1938.11.30.22	Neofelis_diardi	143	48	59	57	36	26	29	50	53	34	33	16	34	40	12	132	42	17	14	10.5	96	53	57	60	34	12	12	57	44	11	25	30	14	17	15	17.9
BMNH-1938.11.30.24	Neofelis_diardi	159	47	72	67	37	26	28	39	55	39	39	19	36	46	13	144	45	19	16	7.5	103	57	60	67	39	14	13	65	51	12	29	33	15	17	18	15.15
BMNH-1903.4.9.2	Neofelis_diardi	146	45	64	58	35	26	30	45	53	34	34	15	33	39	13	133	41	17	15	9	95	53	56	59	35	12	13	57	45	12	27	29	14	17	16	18.85
BMNH-30.3.3.5	Neofelis_diardi	142	44	62	57	36	27	29	47	53	34	35	15	31	38	13	129	43	17	15	9	99	54	56	57	36	11	11	59	45	12	26	28	13	17	16	17.15
BMNH-1938.11.30.23	Neofelis_diardi	191	50	85	80	45	32	32	56	57	40	42	22	44	51	17	169	56	21	19	13.5	125	65	70	76	45	15	13	75	54	13	32	35	16	18	17	18.45
BMNH-39.336	Neofelis_diardi	140	44	58	56	36	26	30	41	55	33	33	15	32	40	13	130	42	17	15	8.5	95	54	58	58	35	13	12	59	47	11	26	32	15	18	16	17.1
BMNH-55.1644	Neofelis_nebulosa	163	50	70	63	38	28	28	44	57	41	39	16	34	43	14	151	46	21	16	10.5	106	58	60	70	39	13	13	62	50	13	30	35	15	19	18	19.5
BMNH-43.65	Neofelis_nebulosa	168	55	70	62	40	29	28	42	54	42	42	18	33	40	16	154	46	22	18	10.5	102	58	64	71	40	14	12	67	48	12	31	34	16	18	17	20.3
BMNH-47.685	Neofelis_nebulosa	168	53	69	70	40	26	26	36	58	44	43	20	39	47	13	155	51	23	18	11	104	59	64	70	42	13	12	66	53	11	33	36	17	20	19	20.2
BMNH-58.6.24.49	Neofelis_nebulosa	180	50	84	70	42	30	29	52	58	44	44	19	38	46	14	162	53	23	17	10	120	63	67	73	44	13	14	66	49	13	30	35	17	19	17	20.9
BMNH-30.3.3.4	Neofelis_nebulosa	157	51	68	60	38	27	27	42	55	38	38	17	33	39	15	139	43	19	15	9	101	57	61	63	38	11	14	59	45	12	28	34	15	18	16	18.3
BMNH-1977.17	Neofelis_nebulosa	152	52	59	62	35	25	25	42	55	38	37	17	34	40	14	141	46	19	15	9	101	55	58	64	38	13	12	56	44	11	26	30	14	16	16	19.35
RCSOM-G16.4	Otocolobus_manul	85	34	40	33	26	19	40	55	46	25	23	10	20	25	7	76	26	14	9	6	69	41	43	33	20	10	11	47	32	10	19	21	11	14	12	10.2
BMNH-79.11.21.540	Otocolobus_manul	93	35	41	36	28	19	39	58	49	27	25	13	21	27	6.5	85	26	16	9.8	4.4	72	42	45	36	22	11	12	50	37	9	20	24	9.5	13	13	11.95
BMNH-79.526	Otocolobus_manul	93	37	41	35	28	20	39	56	47	27	25	10	22	26	6.6	84	28	16	9	6.1	70	40	43	37	22	11	12	51	35	8.4	20	24	10	15	13	11
BCMAG-Aa1894	Panthera_leo	288	87	87	133	88	62	61	89	98	89	88	47	68	75	33	270	NA	48	42	17.5	227	120	127	145	88	34	40	119	98	30	56	53	23	24	22	32
BCMAG-Aa3293	Panthera_leo	297	83	91	136	88	60	64	96	105	92	87	47	73	87	31	276	68	48	45	14	219.5	123	136	148	87	32	33	122	NA	33	48	56	28	28	24	35
BCMAG-Aa4746	Panthera_leo	284	94	83	131	73	56	57	89	92	79	77	45	69	84	32	260	73	42	35	13	185	109	116	131	78	35	29	113	NA	NA	NA	58	31	28	26	33
BCMAG-Ab4139	Panthera_leo	305	87	95	144	79	62	58	91	96	83	82	46	76	90	32	275	78	45	37	16	206	120	125	145	83	35	34	118	94	27	56	58	33	28	26	36
BCMAG-Ab4156	Panthera_leo	NA	100	NA	177	94	74	66	113	110	102	96	61	95	114	36	NA	85	56	41	21.5	240	128	138	169	102	37	34	142	120	35	64	NA	NA	NA	NA	37
BCMAG-Ab4168	Panthera_leo	281	78	95	129	76	51	53	79	96	85	85	44	65	80	28	252	68	45	39	10	172	116	125	130	82	32	31	120	96	28	57	57	28	27	25	NA
BCMAG-Ab4172	Panthera_leo	306	83	94	138	82	58.5	62	95	96	85	84	52	70	81	30	274	72	49	45	20.5	217	117	130	150	94	35	36	117	92	28	50	56	30	25	26	33
BCMAG-Ab4186	Panthera_leo	304	79	103	141	87	58	55	96	100	91	89	51	70	83	30	274	76	52	43	17	220	121	132	145	90	35	38	118	96	28	53	56	29	27	24	33
BCMAG-Ac2271	Panthera_leo	363	84	131	172	95	70	65	114	106	101	97	59	91	105	33	319	84	57	47	20.5	247	139	152	169	100	35	40	137	108	31	52	59	31	26	24	NA
BCMAG-Af1352	Panthera_leo	339	99	105	155	83	61	56	95	105	91	90	50	74	93	31	302	81	47	44	18	233	128	141	161	97	34	40	132	98	31	62	60	30	29	27	38
BCMAG-Af1367	Panthera_leo	379	105	112	175	93	69	65	106	105	102	101	61	87	107	36	348	91	60	51	26	260	138	153	186	114	41	42	144	104	34	55	62	32	27	27	37
BCMAG-Ab2183	Panthera_leo	291	81	88	138	86	57	57	91	88	88	86	45	65	79	30	272	77	49	42	14.5	210	126	134	143	84	33	34	123	96	31	54	61	31	25	26	33.8
HM-NH.23.20	Panthera_leo	359	107	119	164	97	68	69.5	117	92	98	89	50	78	92	33	317	84	50	43	22	241	128	136	162	98	36	40	140	108	34	59	66	35	31	27	36
BRSUVA-LionL-Bullet	Panthera_leo	378	108	117	172	103	72	55	113	105	107	103	58	84	102	36	340	94	58	46	23.5	245	136	145	177	106	34	40	138	109	30	55	64	34	28	28	37
BRSUVA-LionL-noP3	Panthera_leo	378	92	143	163	99	72	73	103	109	108	100	58	76	95	33	336	87	56	47	22.5	238	134	145	174	107	41	43	144	115	30	63	68	32	34	32	39
BRSUVA-LionS-Brown	Panthera_leo	312	85	104	139	83	62	65	95	NA	87	86	49	71	85	31	276	74	45	41	16	199	117	124	145	87	36	36	125	102	28	55	58	30	27	24	35
BRSUVA-LionS-Red	Panthera_leo	303	101	81	142	83	60	61	100	100	86	87	49	69	86	30	269	75	53	44	17.5	205	116	127	140	87	30	38	117	91	27	50	52	27	26	21	32
BMNH-77.857	Panthera_onca	305	81	125	128	80	63	58	95	90	87	85	42	67	82	37	264	86	45	36	12	204	111	122	126	70	25	29	118	90	32	48	55	25	26	26	32.75
BMNH-89.370	Panthera_onca	280	79	115	119	73	56	52	88	89	79	80	40	61	78	27	258	80	42	35	13.5	195	101	111	122	75	26	25	120	87	31	50	47	22	23	25	30.6
BMNH-1990.542	Panthera_onca	267	78	105	113	68	48	48	72	82	69	74	34	59	72	26	238	75	36	32	9.5	177	96	105	112	71	26	26	114	85	29	45	47	23	21	21	29.7
BMNH-1935.3.6.2	Panthera_onca	250	70	104	105	57	44	46	80	80	65	65	34	57	67	21	219	68	33	29	12.5	169	85	95	104	65	23	21	103	76	24	43	50	21	26	26	26.2
BMNH-1926.12.4.29	Panthera_onca	227	67	94	97	52	38	41	58	72	58	58	29	52	62	22	202	62	29	26	10.5	154	83	87	92	59	22	23	95	73	25	39	45	20	21	23	25.55
BMNH-1845.8.25.21	Panthera_onca	239	69	89	104	64	44	47	80	80	63	63	35	52	67	25	218	68	32	26	10	174	89	100	102	61	21	23	103	76	28	44	44	19	22	22	25.45
BMNH-1936.5.26.3	Panthera_onca	221	68	87	95	59	42	50	69	73	64	62	31	50	62	21	196	61	31	29	10	152	82	90	92	57	21	23	88	68	22	40	40	20	20	21	25.1
BMNH-1934.9.10.64	Panthera_onca	225	68	92	94	59	39	35	57	78	62	63	31	53	64	23	205	66	30	29	6.5	158	84	91	95	56	24	24	96	72	24	41	46	21	24	23	26.9
BMNH-1874.4.8.2	Panthera_onca	235	67	96	102	57	44	45	69	78	62	62	31	57	70	22	216	66	31	28	11	164	87	94	99	58	24	24	100	79	26	42	47	21	23	26	28.3
BMNH-1928.5.2.139	Panthera_onca	234	64	92	105	62	43	45	66	78	69	67	35	50	63	22	217	66	32	32	8.7	158	91	97	104	63	23	22	102	81	25	39	47	22	24	24	30.15
BMNH-1870.3.10.19	Panthera_onca	222	58	87	102	56	39	41	68	74	61	59	31	52	63	20	202	63	33	28	11.5	155	82	91	94	58	23	22	90	70	24	39	45	19	23	22	25.2
BMNH-1845.8.25.23	Panthera_onca	260	72	102	117	63	48	49	81	84	71	69	38	62	76	29	226	70	33	30	11.5	179	90	103	110	66	22	22	107	75	25	41	45	23	24	22	26.9
BMNH-1845.8.25.22	Panthera_onca	266	67	117	115	67	48	49	81	78	73	72	36	59	74	24	236	68	38	31	12	181	93	103	116	70	19	22	112	80	29	45	47	23	23	24	27.65
BMNH-1884.2.8.1	Panthera_onca	243	83	86	104	58	42	45	75	81	64	63	33	58	73	22	215	63	34	28	12.5	162	87	93	102	65	24	24	100	74	27	42	45	22	24	22	27.55
BCMAG-Aa1899	Panthera_pardus	242	69	95	97	65	45	49	86	75	63	61	33	51	61	24	220	64	33	23	14	166	91.5	102	113	69	25	25	96.5	73	23	38	50	22	23	25	26.9
BCMAG-Ab3871	Panthera_pardus	182	52	72	79	50	31	41	61	66	48	47	27	44	52	23	168	54	24	24	9	127	76	85	79	50	18	19	78	64	15	32	37	18	21	18	21
BCMAG-Ab4129	Panthera_pardus	217	66	85	96	57	38	45	71	75	60	61	30	52	62	22	194	58	30	23	9	136	80	86	96	57	21	20	95	71	24	40	42	20	24	22	26
BCMAG-Ab4133	Panthera_pardus	245	78	97	107	62	41	46	74	79	60	59	32	61	73	25	214	NA	29	23	14	149	80	89	100	63	26	24	94	65	23	40	42	21	22	21	25
BCMAG-Ab4137	Panthera_pardus	190	62	64	84	49	31	38	53	73	53	51	26	45	53	19	NA	54	24	21	6.25	NA	74	78	87	52	20	19	NA	NA	20	36	NA	NA	NA	NA	24
BCMAG-Ab4140	Panthera_pardus	234	70	101	97	59	40	42	78	76	58	57	31	55	65	24	205	64	30	23	14	152	82	92	97	61	21	21	96	70	25	40	44	23	24	22	24.3
BCMAG-Ad2710	Panthera_pardus	197	72	70	82	43	30	38	54	70	47	47	28	45	54	17	178	55	25	21	10.5	123	72	77	87	55	19	18	80	64	22	38	40	19	22	20	23
BCMAG-Af1351	Panthera_pardus	214	69	85	92	51	35	38	65	71	54	53	28	52	62	23	NA	NA	28	23	10	136	77	82	93	58	23	20	84	NA	21	38	NA	NA	NA	NA	25
BCMAG-Af1357	Panthera_pardus	215	73	76	94	56	41	41	73	70	56	57	28	54	69	23	192	60	27	22	11.5	135	76	82	91	55	20	21	89	65	23	43	42	20	23	22	24
BCMAG-Af1368	Panthera_pardus	180	59	69	74	52	35	45	68	68	49	48	21	42	51	20	NA	NA	24	21	7	126	77	86	79	50	18	19	78	NA	23	33	NA	NA	NA	NA	23
BCMAG-Af1375	Panthera_pardus	190	54	82	81	48	33	39	60	66	47	44	24	48	56	18	169	52	24	21	8	124	69	76	78	48	20	19	77	59	21	34	35	18	20	NA	22.65
BCMAG-Af1416	Panthera_pardus	187	56	77	81	47	30	43	52	66	50	46	22	47	55	13	170	51	23	23	6.5	114	69	76	83	51	16	15	75	63	16	36	40	19	21	20	24
BCMAG-Ab2185	Panthera_pardus	242	71	96	104	62	45	47	82	77	60	58	36	59	58	26	213	66	31	24	12.5	156	85	95	102	64	24	23	97	71	22	44	44	20	24	22	25.85
HM-NH.74.11.21	Panthera_pardus	228	71	84	97	54	38	41	61	76	58	57	28	57	66	20.5	208	63	30	23	10.25	138	81	86	103.5	62.5	20	18	91	64	20	40	43	20	22	22.5	26.25
BRSUVA-LeopardL	Panthera_pardus	215	69	83	95	55	38	44	69	75	56	54	31	53	64	22	NA	NA	27	22	9	146	79	88	88	56	22	21	91	NA	20	NA	NA	NA	NA	NA	24
BRSUVA-LeopardS	Panthera_pardus	186	62	72	79	49	34	42	60	67	49	46	27	44	54	20	171	54	25	20	10.5	121	70	79	80	49	19	19	75	59	17	35	37	17	21	18	22
BCMAG-Ab2866	Panthera_tigris	329	92	107	156	81	63	59	91	93	90	97	48	94	108	35	295	92	49	40	14.5	222	115	128	154	92	33	36	117	94	31	60	62	29	31	29	33
BCMAG-Ab4126	Panthera_tigris	336	104	105	159	81	70	58	106	92	91	95	50	94	113	33	300	91	49	42	17.5	227	119	127	150	90	30	35	132	102	29	62	59	32	25	24	35
BCMAG-Ab4130	Panthera_tigris	286	85	90	133	71	51	NA	77	88	74	77	39	81	96	26	263	77	37	35	12	184	103	108	128	73	30	30	108	83	25	47	52	27	27	26	32.5
BCMAG-Ab4132	Panthera_tigris	303	92	102	141	74	63	59	90	91	79	82	44	84	98	35	270	76	41	36	13	203	110	119	135	80	33	33	119	88	30	53	55	27	29	25	33
BCMAG-Ab4136	Panthera_tigris	250	75	85	116	72	45	56	69	88	75	73	37	73	81	26	228	66	40	36	10.5	175	104	108	114	67	33	31	106	91	26	54	57	26	22	28	33
BCMAG-Ab4138	Panthera_tigris	289	84	100	138	71	56	57	84	93	75	77	41	86	100	31	257	77	39	35	11	197	113	120	132	77	32	33	113	96	27	54	54	28	27	26	33
BCMAG-Ab4143	Panthera_tigris	293	80	100	146	73	54	51	72	89	77	85	43	85	102	30	272	79	40	40	10	200	112	118	141	81	31	29	120	103	27	53	57	32	27	28	36.5
BCMAG-Ab4148	Panthera_tigris	254	71	92	111	71	49	51	72	87	79	79	38	72	81	20	227	62	39	39	7	174	97	106	111	67	32	30	105	85	21	48	48	26	26	22	31
BCMAG-Ab4149	Panthera_tigris	288	76	107	135	80	60	59	86	89	78	82	45	79	96	32	253	74	45	39	16	200	112	122	128	79	32	36	110	85	22	48	51	28	26	27	29
BCMAG-Ab4151	Panthera_tigris	353	99	119	168	84	65	58	102	96	92	96	48	99	120	37	308	94	48	40	14	234	127	138	159	94	38	34	131	104	33	62	60	33	32	30	36.5
BCMAG-Ab4153	Panthera_tigris	354	91	129	164	86	66	61	97	97	95	95	48	99	113	34	309	87	47	42	13	223.5	122	129	156	88	36	33	135	108	33	59	66	34	31	29	37
BCMAG-Ab4154	Panthera_tigris	310	82	107	145	79	58	55	81	94	87	92	49	88	103	34	282	81	43	38	9	215	122	128	144	83	33	35	124	97	31	62	55	33	28	25	37
BCMAG-Ab4155	Panthera_tigris	303	88	111	139	79	62	59	92	95	84	85	45	86	100	29	NA	68	43	34	12.5	204	112	120	132	77	31	34	118	91	26	52	NA	NA	26	NA	33
BCMAG-Ab4158	Panthera_tigris	332	97	110	150	83	64	57	99	93	90	93	50	88	107	32	286	80	47	40	15	233	118	132	150	87	42	42	130	96	26	51	56	28	31	30	33
BCMAG-Ab4173	Panthera_tigris	344	93	126	155	85	68	58	90	93	99	99	48	93	112	33	300	88	53	41	13	230	122	129	149	83	33	31	134	96	32	61	55	29	28	30	35
BCMAG-Ab4175	Panthera_tigris	356	100	125	163	82	66	55	90	97	89	94	50	100	116	34	310	82	48	41	16	254	124	137	155	93	35	36	140	110	31	61	58	33	29	30	37
BCMAG-Ab4184	Panthera_tigris	345	93	123	159	81	62	48	84	92	90	93	48	97	116	33	302	85	50	41	16	234	123	131	150	88	34	38	126	98	30	63	58	31	27	27	35.5
BCMAG-Ab4187	Panthera_tigris	331	93	106	157	88	71	61	99	94	94	100	50	95	106	35	NA	81	51	42	12.5	240	124	137	151	90	34	34	NA	NA	32	NA	NA	NA	29	NA	36
BCMAG-Ab4188	Panthera_tigris	264	77	87	125	70	46	54	71	88	73	73	38	77	87	26	238	67	38	36	12.5	171	100	104	122	73	31	29	106	80	28	51	53	26	28	NA	31
BCMAG-Ab4189	Panthera_tigris	339	91	125	159	78	68	60	100	98	87	94	43	95	115	34	298	85	48	38	10.5	236	125	133	152	85	35	33	132	94	33	55	58	32	30	29	36
BCMAG-Af1420	Panthera_tigris	347	84	131	169	85	66	58	99	102	95	99	50	98	119	35	307	NA	53	42	15.5	237	132	141	156	98	39	42	144	109	36	67	60	32	NA	30	36
BCMAG-Ab2184	Panthera_tigris	290	83	100	139	74	60	59	94	90	78	81	43	81	95	34	259	80	45	39	13	199	113	122	128	78	31	34	109	91	28	56	57	30	28	25	31.65
HM-NH.74.11.19	Panthera_tigris	360	112	117	165	86	78	66	112	93	95	101.5	56	97	117	34	NA	85	53	43.5	18.5	254	123	135	157	93	37	42	134	98	32	58	NA	NA	32	NA	35.5
BMNH-10.3.10.8	Panthera_tigris	322	86	109	148	81	65	58	96	90	88	88	48	88	103	36	287	81	46	39	13	221	118	127	146	83	32	31	125	98	29	54	61	29	30	27	36.4
BRSUVA-Tiger	Panthera_tigris	334	82	118	159	86	67	57	92	95	95	100	51	94	113	35	302	85	49	46	10	232	120	133	152	89	38	41	140	111	39	60	63	31	33	33	36
BMNH-75.2283	Panthera_uncia	196	69	73	79	58	46	51	80	72	56	54	35	36	51	22	179	55	29	22	8	137	78	83	84	46	22	20	84	61	24	37	40	18	21	18	26.4
BMNH-81.1498	Panthera_uncia	179	59	78	75	56	43	48	72	66	55	50	28	35	50	20	164	53	26	22	5.5	122	71	76	74	44	19	20	80	60	22	38	38	16	19	21	23.6
BMNH-1938.6.28.3	Panthera_uncia	169	62	65	67	49	36	47	68	67	48	45	24	37	42	19	156	49	23	20	8	114	67	71	71	41	20	18	75	55	21	35	39	17	20	20	23.45
BMNH-84.2090	Panthera_uncia	175	71	62	68	52	43	50	79	70	50	46	24	31	41	20	162	53	25	20	8	125	72	76	74	43	20	18	79	57	22	36	38	16	18	19	22.7
BMNH-47.37	Panthera_uncia	154	59	62	62	45	32	45	61	64	43	40	21	33	38	17	142	44	21	19	6.5	102	62	66	66	38	18	18	69	50	20	32	36	15	18	19	21
HM-NH.35.93	Pardofelis_marmorata	99	40	43	35	25	15	26	52	42	26	25	11	16	21	7	89	31	14	10	4	69	39	42	36	21	9	9	46	34	9	19	23	9	14	12	13
BMNH-56.10.1.5	Pardofelis_marmorata	90	37	40	32	23	13	30	48	42	23	22	10	16	20	6	80	26	12	9	4	62	37	39	33	21	9	9	43	31	8	15	21	10	12	11	12.5
BMNH-26.10.4.47	Pardofelis_marmorata	89	40	38	31	23	16	32	49	43	22	21	9	16	19	5	80	26	12	9	5	63	36	38	34	20	8	8	40	31	9	19	22	9	13	12	11.95
BMNH-55.1645	Pardofelis_marmorata	100	43	44	34	26	16	25	57	43	26	25	11	17	21	7	89	29	14	9	5.5	72	37	41	37	22	8	9	48	35	11	19	23	9	15	13	12.15
BMNH-61.1277	Pardofelis_marmorata	92	40	42	31	23	15	31	51	44	23	22	10	16	20	7	82	27	13	9	4	63	35	38	35	21	8	8	43	32	8	17	22	9	14	12	11.6
BMNH-95.7.30.4	Pardofelis_marmorata	86	39	38	30	23	12	28	54	41	23	22	9	16	19	8	78	26	13	9	4	63	37	39	33	19	9	9	41	31	7	18	21	9	12	11	11.8
BMNH-32.2.9.1	Pardofelis_marmorata	90	37	40	33	22	15	31	51	41	22	22	10	18	20	7	80	26	13	9	5	65	35	37	34	21	8	8	42	32	8	20	22	9	14	14	11.15
RCSOM-A125.1	Pardofelis_temminckii	131	43	58	50	32	23	33	56	54	31	31	14	25	32	10	122	41	17	14	7	88	50	55	52	31	11	12	54	45	11	26	31	13	17	15	16.05
BMNH-23.1.7.7	Pardofelis_temminckii	148	53	66	52	37	23	31	61	57	37	34	16	28	34	11	132	46	19	14	7.75	99	55	58	56	35	14	14	60	46	13	27	32	15	19	17	17.15
BMNH-1868.9.12.1	Pardofelis_temminckii	140	46	61	53	37	25	34	61	52	37	34	18	27	36	11	125	40	20	15	8.1	95	54	59	55	30	14	14	57	46	14	26	29	14	17	15	15.95
BMNH-8.8.7.1	Pardofelis_temminckii	153	50	67	58	37	25	32	58	55	37	35	16	32	38	12	139	49	20	13.8	11	97	52	58	61	39	14	14	63	49	14	27	33	16	19	18	16.9
BMNH-50.510	Pardofelis_temminckii	119	46	52	44	30	18	34	50	53	26	26	13	24	28	8	109	37	15	11	6.4	77	46	48	44	29	12	12	49	38	13	25	30	14	19	16	15.45
BMNH-32.3.1.33	Pardofelis_temminckii	127	50	54	47	30	21	32	53	54	29	28	14	24	30	9.5	116	40	17	13	9.15	83	49	52	49	29	13	14	56	44	11	23	30	14	18	15	14.85
RCSOM-A124.54	Prionailurus_bengalensis	91	31	42	34	23	15	26	44	39	23	21	8	21	24	7	83	30	13	9	6	61	33	36	36	19	8	9	36	30	6	16	21	10	14	11	9.75
BMNH-1938.11.30.27	Prionailurus_bengalensis	89	30	42	32	22	14	24	43	38	22	21	9.1	19	22	6.3	80	27	13	8.7	5.6	60	32	35	35	19	7.9	8	36	29	5.6	16	20	10	13	10	9.25
BMNH-36.5.18.6	Prionailurus_bengalensis	87	30	38	29	21	13	24	42	38	22	20	8.2	17	21	4	81	29	11	8.3	5.45	57	30	33	35	19	8.1	8.6	35	26	5.2	15	20	9.7	12	9.8	9.6
BMNH-27.12.1.66	Prionailurus_bengalensis	102	38	45	36	25	16	25	47	43	26	24	11	21	25	5.6	94	33	14	9.2	6.75	66	37	40	40	22	8.6	8.7	42	32	8.5	18	21	11	13	11	11.2
BMNH-27.12.1.72	Prionailurus_bengalensis	97	38	43	33	26	16	22	46	38	26	23	10	20	24	5.9	88	32	14	8.9	6.35	63	35	38	39	21	7.6	7.9	38	30	8.3	18	21	9.3	14	12	10.45
BMNH-1938.8.8.2	Prionailurus_bengalensis	105	37	49	36	26	18	25	48	44	27	25	10	21	25	7	95	32	15	10	6.1	68	38	41	41	22	8.9	9.3	43	31	9	19	24	11	14	12	11.2
BMNH-8.2.26.19	Prionailurus_bengalensis	89	35	39	31	24	14	29	42	41	24	22	8.4	17	21	5.4	82	28	13	8.7	5.55	58	35	37	37	19	8.4	8.8	37	28	6.6	17	20	9.6	13	11	10.45
BMNH-70.7.18.25	Prionailurus_bengalensis	87	34	41	30	23	13	27	42	39	23	21	8.9	18	21	4.8	80	28	13	8.5	4.8	57	34	37	35	18	8.3	8.3	36	27	7.8	17	21	9.6	13	11	10.05
BMNH-75.2246	Prionailurus_planiceps	97	36	41	31	21	11	16	43	38	21	21	7.2	18	22	1.1	92	32	12	8.6	6.5	60	31	34	39	22	7	7.8	41	33	5.2	18	20	7.6	13	11	10.3
BMNH-92.10.1.2	Prionailurus_planiceps	104	37	47	31	24	13	23	46	39	26	25	8.8	16	20	2.4	98	35	15	10	5.85	61	34	38	40	24	5.5	6.6	44	34	5	17	23	11	13	12	11.35
BMNH-72.8.19.18	Prionailurus_planiceps	107	41	46	33	22	12	22	48	38	22	22	8.8	19	23	2.2	98	35	13	9.2	7.55	62	33	37	41	23	7.1	6.7	41	33	4.5	18	22	11	13	12	11.1
BMNH-29.3.9.1	Prionailurus_planiceps	98	36	42	31	21	12	21	44	38	24	22	8.7	18	21	1.8	93	32	13	8.9	7.15	60	32	35	40	22	6.7	6.4	41	31	4.3	17	21	10	14	11	10.6
BMNH-60.5.4.51	Prionailurus_planiceps	96	37	36	29	20	10	20	42	37	21	20	8	15	19	1.9	89	31	12	8.4	6.35	54	31	34	38	22	6.1	6	41	31	5.3	17	20	10	14	11	11.15
BMNH-79.11.21.627	Prionailurus_planiceps	102	37	43	32	21	12	22	46	38	23	24	9.2	17	21	2.5	94	33	14	9.5	6.75	61	33	36	41	24	6.7	6.1	43	33	6.6	17	23	11	15	12	12.05
BMNH-61.1276	Prionailurus_planiceps	98	35	42	31	21	12	22	46	37	23	23	9	18	22	2.7	89	32	14	9.4	6.65	58	33	36	38	20	5.8	5.7	40	31	6.4	18	22	9.1	14	12	10.55
RCSOM-A124.6	Prionailurus_rubiginosus	78	28	38	26	21	12	25	NA	35	21	19	8	16	18	2.5	71	26	11	8	5	53	31	34	30	17	8	7	32	25	6	14	20	9	11	12	8.9
RCSOM-A124.61	Prionailurus_rubiginosus	82	33	36	30	21	14	24	39	36	22	20	8	18	21	2.6	74	26	12	8	5	56	31	35	30	16	9	8	34	27	7	15	20	9	12	12	8.65
RCSOM-A124.62	Prionailurus_rubiginosus	81	31	37	28	21	13	22	39	36	21	20	8	18	20	2.6	73	27	12	8	5	55	30	33	29	16	7	7	34	27	7	16	20	10	11	12	8.55
RCSOM-A124.63	Prionailurus_rubiginosus	73	27	34	24	19	11	25	39	36	20	18	7	14	17	2.2	66	24	11	8	4	49	28	31	28	15	7	6	31	25	6	13	18	8	11	11	8.65
RCSOM-A124.64	Prionailurus_rubiginosus	75	28	37	24	19	11	25	39	35	20	18	8	14	17	1.3	70	25	11	8	5	50	28	31	27	15	7	7	31	26	5	14	18	6	10	11	7.6
BMNH-20.2.8.5	Prionailurus_rubiginosus	78	29	36	27	21	12	26	40	35	22	19	7.6	17	19	2.4	71	26	11	8.4	4.15	51	29	32	29	16	8	8	33	26	7.1	15	19	9.4	11	11	8.45
BMNH-15.3.1.49	Prionailurus_rubiginosus	78	30	35	27	21	13	23	39	36	21	20	8	16	19	1.5	71	24	13	8.4	5.3	55	30	33	30	16	7.7	7.6	34	25	6.3	15	20	9	12	11	8.5
BMNH-66.5.8.1	Prionailurus_rubiginosus	78	30	36	26	21	12	25	40	35	21	19	7.5	15	18	2.6	71	24	11	7.7	3.95	52	29	32	30	15	7.6	6.9	34	25	5.7	14	18	6.9	12	11	8.4
BMNH-34.4.17.2	Prionailurus_rubiginosus	76	29	34	26	19	12	25	38	34	20	18	7.5	15	17	2.5	69	25	11	7.9	4.7	48	27	30	28	16	7.2	7.1	31	24	5.7	15	19	8.5	12	10	8.5
RCSOM-A124.71	Prionailurus_viverrinus	151	50	63	56	36	25	30	65	51	39	37	15	35	42	7	139	48	22	14	8	96	54	61	61	35	11	12	59	47	11	26	28	14	16	13	15.65
RCSOM-A124.7	Prionailurus_viverrinus	125	46	51	46	28	19	26	51	44	31	30	13	28	33	6	116	40	17	12	7	78	47	49	50	28	10	12	47	36	9	22	27	12	15	15	14.55
RCSOM-G16.31	Prionailurus_viverrinus	136	41	57	49	33	21	30	54	49	36	35	14	30	36	5	127	43	21	12	7.5	87	49	56	56	32	11	12	55	45	9	21	28	13	14	15	14.3
BMNH-75.2286	Prionailurus_viverrinus	150	51	61	56	34	23	29	59	49	38	37	15	33	39	6.2	132	46	21	13	7.7	98	54	59	57	34	11	15	60	41	13	27	32	14	17	17	15.2
BMNH-14.1.19.1	Prionailurus_viverrinus	139	46	61	50	32	19	25	55	49	36	35	13	30	36	5.3	126	43	20	13	6.7	89	53	58	54	32	12	13	57	45	11	24	30	14	17	15	15.45
BMNH-43.1.12.120	Prionailurus_viverrinus	129	46	52	47	26	17	27	55	47	30	30	11	30	34	4.8	120	41	17	12	6.85	76	45	48	52	30	11	11	48	37	9	21	26	13	16	14	14.4
RCSOM-A123.4	Puma_concolor	209	71	85	90	60	46	45	85	76	63	58	31	46	58	15	190	62	32	22	7	154	84	92	87	55	23	24	86	64	26	39	41	20	22	21	22.3
RCSOM-G98.12	Puma_concolor	166	60	68	70	50	31	42	64	64	50	48	27	38	46	11	152	50	26	20	7	115	66	72	71	40	20	20	68	57	20	32	36	16	19	16	19.15
RCSOM-A123.31	Puma_concolor	178	44	91	74	46	33	42	73	67	46	49	22	38	47	14	161	54	26	21	5.5	143	78	85	72	43	19	19	78	58	20	36	35	16	19	17	21.2
BMNH-1837.3.15.17	Puma_concolor	183	62	71	79	50	36	39	70	68	52	52	26	42	53	13	165	NA	26	20	6	126	76	81	74	46	21	22	75	62	22	38	39	17	21	20	21.95
BMNH-1858.5.4.56	Puma_concolor	184	64	72	80	50	36	42	73	69	49	49	26	46	52	18	169	56	26	22	9.5	125	71	75	78	51	22	21	71	57	21	33	37	16	17	18	22.4
BMNH-1850.11.22.46	Puma_concolor	177	57	71	76	52	37	44	66	69	50	48	22	42	48	15	158	53	25	19	8.75	128	72	79	68	42	20	20	77	62	21	33	37	16	19	20	19.65
BMNH-1901.11.14.1	Puma_concolor	220	71	80	101	63	45	45	80	79	63	62	30	53	60	22	204	70	32	27	9	149	84	91	94	59	26	25	91	74	25	46	43	18	21	20	25.75
BMNH-11.8.21.1	Puma_concolor	224	78	79	97	62	45	47	84	76	63	61	34	48	63	24	202	67	33	26	8	157	86	94	94	55	27	25	92	74	26	46	46	22	23	20	23.2
BMNH-1901.3.21.15	Puma_concolor	200	68	74	84	55	40	44	77	72	54	52	29	47	56	19	184	64	30	23	9	134	74	79	84	51	24	21	83	64	22	40	40	19	21	19	22.1
BMNH-1926.12.4.100	Puma_concolor	202	70	80	81	50	39	45	72	72	55	53	28	42	54	16	182	62	29	22	8.5	134	72	78	80	52	24	20	84	68	24	38	41	20	23	21	21.15
BMNH-1926.1.12.3	Puma_concolor	174	60	72	74	48	31	38	63	69	48	45	23	37	48	12	156	51	25	21	8	115	68	72	70	44	22	18	72	61	22	35	39	19	22	18	20.7
BMNH-52.1084.a	Puma_concolor	193	67	82	80	49	35	36	70	70	52	52	26	46	53	13	170	57	28	22	6	136	75	79	75	45	21	20	82	65	23	35	39	20	20	20	24.15
BMNH-40.692	Puma_concolor	205	74	81	85	58	43	42	73	72	56	54	31	45	57	20	183	61	29	21	9	134	79	82	83	54	22	23	85	67	24	38	40	20	21	20	24.2
BRSUVA-Puma	Puma_concolor	210	67	78	95	57	40	36	71	70	62	61	NA	NA	NA	20	192	60	31	25	7.5	142	82	85	NA	57	26	27	84	NA	27	39	40	16	24	23	24
HM-NH.35.94	Puma_yagouaroundi	98	41	42	32	26	17	31	44	45	24	23	10	16	21	7	93	32	13	11	4.6	63	36	37	36	20	10	9	45	31	10	20	25	10	16	14	12
BMNH-1908.6.17.11	Puma_yagouaroundi	105	41	44	36	25	17	30	44	46	25	24	13	18	23	7	101	39	14	11	6	68	40	43	41	23	11	11	41	34	11	23	26	11	15	15	13
BMNH-1934.9.2.33	Puma_yagouaroundi	106	40	48	37	27	20	31	45	45	27	24	12	20	23	8	101	41	15	11	6	67	39	43	41	22	12	11	40	34	11	23	26	12	14	12	11.3
BMNH-1934.9.2.32	Puma_yagouaroundi	104	35	48	36	25	19	28	45	44	25	23	13	21	25	7	98	38	14	11	5	67	40	43	40	23	12	11	41	32	12	22	24	12	15	13	12.1
BMNH-1926.1.12.8	Puma_yagouaroundi	98	42	42	31	24	17	32	42	46	23	21	12	17	22	6	93	37	13	10	5	61	36	38	36	20	11	11	38	31	10	20	24	12	14	13	11.35
BMNH-1926.1.12.7	Puma_yagouaroundi	92	40	38	30	24	17	29	40	42	21	20	11	17	20	7	89	35	13	11	5	59	37	39	36	20	11	11	37	31	7	18	23	12	14	12	12.1
BMNH-1923.8.9.8	Puma_yagouaroundi	98	39	40	36	26	17	30	43	42	24	23	12	21	24	5	90	35	14	11	4	61	37	40	37	21	11	11	40	31	8	21	24	13	14	12	12.55
BMNH-1886.1.19.1	Puma_yagouaroundi	104	43	42	34	26	18	32	47	45	24	23	12	20	24	7	99	37	13	11	5	64	36	38	40	24	11	11	41	35	11	21	26	13	15	14	11.7
BMNH-1926.1.8.9	Puma_yagouaroundi	111	44	46	38	29	19	31	45	46	27	25	13	19	24	6	105	38	15	13	5	68	42	44	44	25	12	13	43	36	12	21	25	11	15	13	14
MS.Jaguarundi	Puma_yagouaroundi	108	42	44	35	25	18	30	45	46	24	23	13	20	22	7	101	38	14	10	5.7	70	39	40	40	22	12	12	41	32	10	20	23	14	11	10	11.5
UoP-Jaguar	Anomalous_Jaguar	250	76	107	104	64	44	43	61	76	68	70	31	55	65	23	223	68	36	30	11	162	88	97	104	62	20	22	101	77	25	45	48	21	25	26	28.7
UoP-Tiger	Peruvian_Tiger	218	67	87	88	58	39	43	57	75	59	58	28	44	54	23	193	59	31	25	11.5	144	80	86	91	52	20	21	92	68	25	39	47	18	26	23	25.2

## Sheet: Raw_data_mandibular
Raw mandibular measurements of 323 specimens (including missing values)
specimen	Taxa	L_Sym	L_Mand	L_Diast	L_m1	D_MdM1	D_MdP4	R_T1	R_T2	L_CorProc	R_M1	R_M2	D_AngProc	D_Cond
BMNH-1926.6.4.4	Acinonyx_jubatus	34	128	6	19.25	24.5	24	40	48	20	29.5	66.5	12	10
BMNH-1926.6.4.5	Acinonyx_jubatus	33	132	7.5	18.8	25	23.5	42.5	49	22.5	29.5	70.5	11	10.5
BMNH-1931.1.3.3	Acinonyx_jubatus	32	122	5.5	18.3	22.5	22.5	39	45.5	18.5	27.5	63	10	11
BMNH-1931.1.2.9	Acinonyx_jubatus	26	112.5	6	15.9	20	19	36	42	16.5	24.5	56	8	10
BMNH-1942.60	Acinonyx_jubatus	25	105	4	16.45	19	19	35	41.5	17	25	55	10	9
BMNH-1935.2.3.1	Acinonyx_jubatus	29	125.5	5.5	16.65	22.5	22	38	44	19.5	30.5	64	11.5	11
BMNH-1905.8.13.1	Acinonyx_jubatus	34	128	8	17.65	23.5	22.5	42	48.5	21	32	68.5	13.5	12
BMNH-39.536	Acinonyx_jubatus	35	120.5	5	18.35	26	24.5	39.5	46	20.5	30	62	12.5	10
BMNH-43.56	Acinonyx_jubatus	31	113.5	5	17.75	23.5	23	34	41	15.5	26	51.5	10	9
RCSOM-A125.21	Caracal_aurata	18	67	7	11.4	12.5	11	20.5	24.5	11	15	31.5	5	5
RCSOM-A125.2	Caracal_aurata	NA	NA	NA	NA	NA	NA	NA	NA	NA	NA	NA	NA	NA
RCSOM-A125.23	Caracal_aurata	18	69.5	7	11.5	12.5	11	21	24	10.5	17.5	33.5	6.5	6
BMNH-25.10.7.13	Caracal_aurata	22	83	8	12.6	16	14.5	26	29	12.5	21	48	9.5	5
BMNH-1938.3.29.1	Caracal_aurata	23	87	10	12.3	17	15.5	28	32	15	20	41.5	10.5	6
RCSOM-A121.1	Caracal_caracal	18	73	6	11.85	14.5	13.5	22.5	25.5	13	15.5	32.5	7.5	6
RCSOM-A121.11	Caracal_caracal	17	71	4	10.95	13	12.5	24	25	12	17.5	32.5	9.5	6
RCSOM-A121.12	Caracal_caracal	19	77	6	10.7	15	14	23.5	27	12.5	16.5	35.5	8	7
RCSOM-A121.13	Caracal_caracal	23	86.5	8	12	17	16	29	33	16.5	22	48.5	11	7
RCSOM-A121.2	Caracal_caracal	19	71	3	12.3	13	13	21.5	25	10.5	16	35	6	6
RCSOM-A121.15	Caracal_caracal	NA	NA	NA	NA	NA	NA	NA	NA	NA	NA	NA	NA	NA
RCSOM-A121.3	Caracal_caracal	15	68.5	6	11.15	13	12	20	24	13	17.5	36	7.5	6
RCSOM-A121.22	Caracal_caracal	16	62	4	10.9	12	12	18.5	21	11	14.5	29.5	5	5
RCSOM-A121.21	Caracal_caracal	17	69.5	6	10.8	13	12	20	23.5	10.5	15	35	7	4.5
RCSOM-A120.21	Felis_chaus	17	70.5	5	10.2	13.5	12	21.5	23.5	10	16	30.5	7	5.5
BMNH-19.7.7.3494	Felis_chaus	20	78	9	11.4	14.5	13.5	21.5	25.5	10	16.5	33.5	7.5	4
BMNH-92.5.22.1	Felis_chaus	18	69	6	10.1	12	12	19	23	11	14	29	7	5
BMNH-1909.7.1.15	Felis_chaus	20	82.5	9	10.25	15	14.5	23.5	28.5	13	20	34	10	6
BMNH-1934.12.11.4	Felis_chaus	21	81.5	8.5	10.9	15	13	22	27	11.5	18.5	34.5	9.5	5
BMNH-77.858	Felis_chaus	20	80	9	10.2	15	14	22	26	11.5	16.5	35	7	5
BMNH-32.2.1.76	Felis_chaus	20	79.5	9.5	11.45	14.5	13	22.5	26.5	12	17	34.5	8.5	4
BMNH-1936.4.14.35	Felis_chaus	24	86	8	11.8	15.5	14	25	29.5	11.5	20	39	7.5	6
BMNH-8.1.13.4	Felis_chaus	17	69	8.5	10.25	12.5	11.5	19	22	9	14	30.5	5.5	4
BMNH-4.6.1.1	Felis_chaus	17	66	7.5	10.2	12	11	19	22	9	13	31	5	4
BMNH-22.5.16.27	Felis_chaus	18	69	7	10.05	12.5	11	19.5	23	9.5	14.5	30.5	5	4.5
BMNH-29.10.19.1	Felis_chaus	20	73.5	10	9.7	13	12	20	22	11	16	32	8	5
BMNH-25.6.10.12	Felis_chaus	17	71	9	9.5	13	12	23	25.5	11.5	15	31	6	5
BMNH-12.6.28.11	Felis_chaus	17	63	6	10.05	11	10	18.5	21.5	9	13	29.5	6	4
BMNH-32.2.1.39	Felis_chaus	18	66	7	10.75	12	11	17.5	20	8.5	13	30	5.5	4
BMNH-32.2.1.64	Felis_chaus	15	66	9	9.4	11	10.5	19	21	7.5	12	31	4	4
BMNH-32.2.1.59	Felis_chaus	20	70.5	9.5	8.75	13.5	12.5	20.5	23	9.5	14.5	30.5	7	5
BMNH-14.8.22.17	Felis_chaus	16	61	8	9	12	11	17.5	21.5	9	13	30	5.5	4.5
BMNH-14.7.19.86	Felis_chaus	17	70.5	7.5	10.2	13	11	20	23	10	15	39.5	6	4
BMNH-1934.3.24.14	Felis_chaus	17	68.5	7.5	10.2	12.5	11	21	24.5	11.5	15	35	7	5
BMNH-67.1429	Felis_margarita	13	52.5	4.95	7.2	9.75	9.2	14	17.5	7.35	11.5	26	5.4	3.7
BMNH-59.634	Felis_margarita	13	54.5	5.65	7.5	11	10	18	22	8.6	13.5	26.5	5.55	4.3
BMNH-2.12.1.5	Felis_nigripes	11	45	6.35	6.45	8.1	7.3	13	16	6.25	11	22.5	3.7	3.75
BMNH-39.679	Felis_nigripes	10	42	5.7	6.6	7.5	6.95	12	14	4.95	10	20.5	3.85	3.8
BMNH-2.12.1.4	Felis_nigripes	12	43.5	5.4	6.7	8.45	7.75	12.5	15.5	6.5	11	21.5	3.85	3.8
BCMAG-Af1371	Felis_silvestris	14	56	6.4	7.15	9.5	8.65	15.2	17	9	11.35	27.1	4.6	3.65
BCMAG-Af1374	Felis_silvestris	13.3	50.5	5	7.2	8.9	8.3	14	16.2	6.55	10.15	23.2	4.1	3.5
BCMAG-Af1382	Felis_silvestris	11.8	51.7	5.8	7.35	9.25	9.2	14.1	15.75	8	11.45	24.4	3.35	3.8
BCMAG-Af1384	Felis_silvestris	NA	NA	NA	NA	NA	NA	NA	NA	NA	NA	NA	NA	NA
BCMAG-Af1385	Felis_silvestris	NA	NA	NA	NA	NA	NA	NA	NA	NA	NA	NA	NA	NA
BCMAG-Af1386	Felis_silvestris	11	47	5.2	6.65	7.6	7.55	12.25	13.65	7.3	10.05	22.05	3.85	3.4
BCMAG-Af1387	Felis_silvestris	NA	NA	NA	NA	NA	NA	NA	NA	NA	NA	NA	NA	NA
BCMAG-Af1388	Felis_silvestris	NA	NA	NA	NA	NA	NA	NA	NA	NA	NA	NA	NA	NA
BRSUVA-Cat-CHAIRO	Felis_silvestris	15	61.5	8	7.5	11.65	11.1	17	19.5	8	13.5	29.5	5	4.5
BRSUVA-T.1.543	Felis_silvestris	14	58.5	6.55	7.95	11.75	11	17	20	8	12	26.5	5.25	4.5
BCMAG-Ab4632	Felis_silvestris	NA	NA	NA	NA	NA	NA	NA	NA	NA	NA	NA	NA	NA
BCMAG-Ab4598	Felis_silvestris	17	58.5	5.7	8.2	11	10	18	19.5	10	13.5	28	6.35	4.6
BCMAG-Ab4631	Felis_silvestris	15.5	64	7.85	8.7	11.3	10.55	18.6	19.6	8.5	13.45	27.5	4.85	4
BCMAG-Af1372	Felis_silvestris	14	56.5	6.45	7.1	10.5	9.65	16.7	21	8.5	11	28	4.35	4.3
BCMAG-Af1373	Felis_silvestris	NA	NA	NA	NA	NA	NA	NA	NA	NA	NA	NA	NA	NA
BCMAG-Af1383	Felis_silvestris	NA	NA	NA	NA	NA	NA	NA	NA	NA	NA	NA	NA	NA
RCSOM-G16.24	Felis_silvestris	15	56	6.5	7.75	11	10	17	19.5	9	15	27.5	7.5	5
RCSOM-A120.1	Felis_silvestris	14	56	6.5	8.65	10.5	10	17	19	7.5	12	27.5	4	3
RCSOM-A120.12	Felis_silvestris	13	53	5.5	7.8	10	9	16	18	7	13	24.5	7	4
RCSOM-A120.13	Felis_silvestris	16	60.5	6	8.8	11.5	10.65	19	21	10	14	28	7	5
RCSOM-G70.5	Felis_silvestris	15	58.5	6.5	8.6	12	11	18	21	8	14.5	27.5	7.5	4
BCMAG-Af926	Felis_silvestris	15	55.5	5	8.1	10.2	9.95	18.5	19.5	10	13.5	25.5	7	4.25
BCMAG-Ab2797	Felis_silvestris	15	60	5.5	8.05	10.5	9.85	18	20	9	15	27	8	5
BCMAG-Ab4630	Felis_silvestris	15	56.5	6.25	8.15	11	10	16	18.5	8	14	25.5	6.5	4
BCMAG-Ab4629	Felis_silvestris	17	61	7	8.4	12.25	10.75	19	21	9	15	27.5	8	5
BCMAG-Ab1536	Felis_silvestris	18	61.5	6.5	8.2	12.5	11.5	20	22	9	15	27.5	8	4
BMNH-1901.11.18.1	Leopardus_colocolo	20	63	7	8.6	13	13	20	24	10.5	13	31.5	6	4.5
BMNH-1901.12.27.1	Leopardus_colocolo	18	61	5	9.2	12	12	18.5	21.5	9	12	29.5	5.5	4
BMNH-1927.11.1.67	Leopardus_colocolo	15	51.5	4.5	8.5	11	11	15	19	9	12	26.5	4	3.5
BMNH-1908.4.13.1	Leopardus_colocolo	19	63	5	9.5	13	13	21	23.5	11	13.5	30.5	5.5	4
BMNH-1921.6.7.3	Leopardus_colocolo	18	61	4	10.3	13	12	19	23.5	9.5	13.5	30.5	5.5	5
RCSOM-G16.3	Leopardus_geoffroyi	15	54.5	6.5	8.05	10	9	16	19	7	12	28	5	4
BMNH-1913.8.14.1	Leopardus_geoffroyi	21	68.5	7	10.45	14.85	14.15	21	25	10	15	38.5	7	5.5
BMNH-1917.1.25.2	Leopardus_geoffroyi	18	61	4	9.55	12	10.85	19	21	9	14.5	30.5	7	5
BMNH-1909.12.1.9	Leopardus_geoffroyi	19	66	7	9.95	13.75	12.1	19.5	23	9	14.5	37	6	5
BMNH-12.11.15.1	Leopardus_geoffroyi	16	60	5	9.6	12	11	16.5	20	8	13	31	4.5	4.5
BMNH-1909.12.1.8	Leopardus_geoffroyi	19	64.5	6	9.35	13.25	12.2	21	25	9	15.5	31	6.5	6
BMNH-1921.4.8.1	Leopardus_geoffroyi	14	51.5	3.8	9.3	9.65	8.85	15	17.5	6.5	10.5	24	4	3.6
BMNH-1917.1.25.3	Leopardus_geoffroyi	15	53.5	4.85	8.8	10	9.35	14	19	7.5	11	25	4.45	3.95
BMNH-1837.5.13.94	Leopardus_geoffroyi	19	66.5	5	9.9	13	12.5	21	22	11	16	32	7.85	5.1
BMNH-1903.7.9.1	Leopardus_guigna	13	49	5	6.7	9	8	15	16	6	11	24	4	3
BMNH-1905.2.4.1	Leopardus_guigna	14	48.5	5	6.55	9	8.5	14.5	17	6	11	25.5	4	3
BCMAG-Ab2160	Leopardus_pardalis	22	77.5	6.4	10.15	15.4	13.8	23.6	25.75	12.5	16.05	41.95	6	6
BCMAG-Af1355	Leopardus_pardalis	20	70.5	5.6	11	15.4	13.55	21.25	24	9	15	34.5	5	5.5
BCMAG-Af1356	Leopardus_pardalis	30	89.5	6.85	12.15	19	18	26	28.5	12.5	18.5	41	7	6
BCMAG-Af1380	Leopardus_pardalis	27.3	85.8	7.1	11.85	17.8	16.5	25.65	29	10	16.9	41.7	7	5.5
BCMAG-Af1381	Leopardus_pardalis	24	80.7	7.5	12	17.15	16.2	23.5	27.5	13	16.5	47.05	7.5	5
RCSOM-A127.12	Leopardus_pardalis	17	75.5	8	10.65	13	12	22	26	11	17.5	34.5	9	5
RCSOM-A127.2	Leopardus_pardalis	25	76.5	3.5	13.6	16	15	21.5	24.5	11.5	15.5	36	9.5	5
RCSOM-G70.7	Leopardus_pardalis	24	73.5	6	11.05	15.5	15.5	24.5	26.5	11	17.5	37	8.5	5
BMNH-1904.12.4.5	Leopardus_pardalis	28	91	7.5	12.15	19.5	18	31.5	35	14.5	21.5	52.5	8	7
BMNH-1926.12.4.28	Leopardus_pardalis	23	75.5	5	10.85	14.5	13.5	23.5	25	11	17.5	38.5	7.5	5.5
BMNH-1914.4.25.48	Leopardus_pardalis	31	95	8	12.7	21	18.5	33	36.5	16	21.5	51	11.5	7
BMNH-1899.8.1.28	Leopardus_pardalis	22	76	5	11.85	15	13.5	21.5	24	8.5	16.5	39	8	5
BMNH-1933.6.12.1	Leopardus_pardalis	31	93	6	12.7	19	18.5	29	31	13.5	20.5	47	11	6.5
BMNH-1915.2.15.1	Leopardus_pardalis	23	75.5	4	11.45	16	14.5	22	25	13	16	37	8.5	5
MS-Ocelot	Leopardus_pardalis	22	80	5.85	10	15.5	15.5	24.5	25.5	10	12	42	4.5	4.5
RCSOM-G70.3	Leopardus_tigrinus	10	44.5	4	7.25	8	7.65	12.5	14.5	5.5	9.5	23	3.5	3
BMNH-1903.7.1.11	Leopardus_tigrinus	15	54	5	8.4	9.5	9	15	17.5	6	12	25	4	4
BMNH-63.1211	Leopardus_tigrinus	14	49	5	6.8	9	8	13.5	15	5	11	24.5	3	3
BMNH-1884.2.8.3	Leopardus_tigrinus	12	48.5	4.15	7.15	8.4	7.9	14	17	7	10.5	24.5	4	4
BMNH-29.6.6.1	Leopardus_tigrinus	13	49	5	7.6	9	8.65	15	17	5.5	11	23	4	4
BMNH-1898.7.1.2	Leopardus_tigrinus	14	51.5	5	7.9	9.5	9	14.5	16	5	12	27	4	4.5
BMNH-98.3.2.16	Leopardus_wiedii	17	55.5	5	7.5	11	10	16	17	8.5	11.5	28	5	4
BMNH-1855.12.26.175	Leopardus_wiedii	15	54.5	6	7.65	10	9.35	14	16	7	12	28.5	5.5	4
BMNH-1858.5.4.71	Leopardus_wiedii	17	60	6	8.35	10.5	10.3	17	19.5	7	12	30	6.5	4
BMNH-1914.5.28.9	Leopardus_wiedii	17	62.5	5	9.4	11.25	10.3	17.5	20	8	13.5	33	6	4.5
BMNH-1908.6.17.9	Leopardus_wiedii	16	58	5.5	8.85	11.45	10.6	16	18	8	14	32	5.5	5
BMNH-26.1.12.5	Leopardus_wiedii	15	58.5	6	8.4	10.65	9.8	17	17.5	8.5	13	30.5	6	4
BMNH-1922.5.29.3	Leopardus_wiedii	15	52.5	4	7.65	9.25	8.35	14	17	6	11.5	25	4	4
BMNH-1913.12.18.2	Leopardus_wiedii	14	53.5	4	7.5	10.2	9.65	16	17	7	12	25	4.5	4
RCSOM-A124.31	Leptailurus_serval	16	72	7	9.8	12	12	21.5	22.5	9	15.5	35.5	7.5	4
RCSOM-A124.3	Leptailurus_serval	19	75	6	10.8	14	13	22	23	10.5	16.5	36	9	5
RCSOM-A124.2	Leptailurus_serval	16	74.5	6	10.5	13.5	12	23	23	11	16	40	7.5	6
RCSOM-A124.12	Leptailurus_serval	19	66	5	9.5	14	12.5	21	23	10	15	34	5.5	5
RCSOM-A124.11	Leptailurus_serval	19	79	8	10.3	14	13.5	24	25.5	10.5	16	40.5	8	6
RCSOM-A124.1	Leptailurus_serval	20	76.5	7.5	9.8	14	13	23.5	24	9.5	14.5	38	7	5
RCSOM-G80.11	Leptailurus_serval	20	82	6.5	11.15	16	14.5	25	28	14	19.5	39.5	11	6
BMNH-99.10.23.3	Leptailurus_serval	19	78.5	8	11.45	15	13	24.5	29.5	11.5	18.5	37	8.5	5.5
BMNH-50.2042	Leptailurus_serval	20	78	7	9.15	15	13	24	26.5	12.5	21	41	9	6
BMNH-9.11.2.4	Leptailurus_serval	18	70	5	10.75	12	12	21.5	25	9	15.5	36	5	5
BMNH-9.11.2.5	Leptailurus_serval	18	68.5	6	10.1	14	13.5	21.5	24.5	10	15	35	7.5	5
BMNH-11.1.12.1	Leptailurus_serval	15	69	6	9.1	13	12	22.5	25	13	16.5	40.5	7	6
BMNH-1937.2.24.27	Leptailurus_serval	20	77	9	10.2	15	14	24	26	11	17	41.5	8.5	5
BMNH-66.36	Leptailurus_serval	18	73	7	9.8	15	14	23	24	12	17.5	38	9	5
BMNH-70.679	Leptailurus_serval	17	72	6	9.8	12.5	12	21	24.5	11	16	38	8	5
RCSOM-A122.2	Lynx_canadensis	22	77.5	8	12.45	16	15	23.5	26	11	16.5	36	6	6
RCSOM-A122.3	Lynx_canadensis	23	83	8.5	12.55	16.5	14.5	24.5	26	12	16	40	6.5	6.5
RCSOM-G16.32	Lynx_canadensis	24	85	10.5	12.4	17	16	26	26.5	12.5	16	39	6.5	6
BMNH-62.12.12.29	Lynx_canadensis	20	78	8	12.3	15.35	14	23.5	25	10.5	15	36	6.5	6
BMNH-1989.377	Lynx_canadensis	NA	NA	NA	NA	NA	NA	NA	NA	NA	NA	NA	NA	NA
BMNH-63.2.24.40	Lynx_canadensis	22	80.5	7	12.65	16	14.5	24.5	26.5	10.5	17	40	7	6
BMNH-1.6.29.1	Lynx_canadensis	22	80.5	8	13.3	17	15.5	24	27	11	18.5	39.5	8	6
BMNH-92.4.19.1	Lynx_canadensis	22	86.5	7.5	13.3	17	15	26.5	28	11.5	19.5	43	8	7
BMNH-85.804	Lynx_canadensis	22	81.5	8	12.4	16.55	15.9	23.5	27	11	16.5	36.5	7	5.5
BCMAG-Ab4458	Lynx_canadensis	21	81.5	9	12	15.5	14	25	26	11.5	16.5	40	7	6
RCSOM-A122.1	Lynx_lynx	26	92	9.5	13.55	18.5	18	25	30	14	19.5	44.5	8	7
RCSOM-A122.11	Lynx_lynx	26	85	6	15.3	18	17	25.5	29.5	12.5	15.5	43	5.5	7
BMNH-83.4.21.1	Lynx_lynx	27	87	8	14.95	18	17	26	30	15	17	42	6.5	6
BMNH-85.803	Lynx_lynx	26	77.5	5.5	15.1	16	15.5	22	27	14.5	17.5	35	6.5	7
BMNH-98.8.5.1	Lynx_lynx	28	93	10	14.4	18.5	18	28	32	14	19.5	46.5	7	7
BMNH-1230c	Lynx_lynx	29	91.5	7	15.3	20	18	28	33	15	20.5	51	7.5	8
BMNH-55.12.26.176	Lynx_lynx	30	95.5	8	16.15	20	19.5	28	34	15	20.5	47.5	9	7
BMNH-69.10.19.16	Lynx_lynx	27	89	8.5	15.95	19	18	26.5	31.5	14	18.5	40	8	6
BMNH-58.5.4.63	Lynx_lynx	26	89	8.5	NA	18	17.5	25.5	30.5	15.5	19.5	43.5	7.5	7
BMNH-42.41	Lynx_lynx	NA	NA	NA	NA	NA	NA	NA	NA	NA	NA	NA	NA	NA
BMNH-95.9.4.1	Lynx_pardinus	22	81	7	12.8	16	15.5	24	27	14	17	40	5.5	5
BMNH-55.12.26.179	Lynx_pardinus	21	77.5	8	10	15.5	14.5	26	29.5	13	18	40.5	8	5.5
BMNH-4.12.12.1	Lynx_pardinus	23	82.5	6.5	12.85	16	15	23.5	27	14	19	42	8.5	5
BMNH-39.3664	Lynx_pardinus	20	74.5	6.5	12	14.5	14	22	23.5	12.5	16	37	7	5
BMNH-1903.3.16.1	Lynx_pardinus	22	83	8	12.05	15.5	15	25	27	15	17.5	39.5	7	5
BMNH-19.4.2.1	Lynx_rufus	24	83	10.5	12.1	16	15	27	28.5	10.5	17.5	46	7.5	7
BMNH-1227.a	Lynx_rufus	19	75	8	11.15	14.5	13.5	22	25	11.5	18	39.5	7	6
BMNH-43.5.27.5	Lynx_rufus	20	73.5	8	10	13.5	13.1	22.5	25	10.5	16.5	40.5	6.5	6
BMNH-94.5.9.2	Lynx_rufus	21	73	8.5	11.3	15	14	22	25.5	9	17	40	8.5	5.5
BMNH-82.10.26.10	Lynx_rufus	20	82	10.5	11.15	16.5	15.5	25.5	30.5	13.5	20.5	50	8	6
BMNH-88.11.25.1	Lynx_rufus	20	77	9.5	11.15	16	15	23	28.5	11.5	18.5	40	8.5	6.5
BMNH-57.6.22.6	Lynx_rufus	19	73	7	10	14.5	14	22	25	10.5	15.5	39.5	6.5	5
BMNH-13.8.2.1	Lynx_rufus	19	69	8	10	13	13	19	22.5	9.5	14.5	37	5.5	5
BMNH-1938.11.30.22	Neofelis_diardi	30	93.5	14	13.65	17	17	28	31	13	19	41.5	8	7
BMNH-1938.11.30.24	Neofelis_diardi	32	102.5	11.5	16.45	20	20.5	32.5	34	18	19	45.5	10	7
BMNH-1903.4.9.2	Neofelis_diardi	30	94	12.5	13.55	18	18	27.5	29.5	14	17	44.5	8	7
BMNH-30.3.3.5	Neofelis_diardi	30	95	13	12.35	18	18	28	31	16	22	44	8	7
BMNH-1938.11.30.23	Neofelis_diardi	41	121	17.5	14.95	21	20.5	36	38.5	18	23	56	9.5	7
BMNH-39.336	Neofelis_diardi	30	89.5	11.5	13.15	17.5	18	27.5	30	14	17.5	44	8	6.5
BMNH-55.1644	Neofelis_nebulosa	35	106.5	14	14.75	21	20.5	32	36.5	14	23.5	52	9.5	7
BMNH-43.65	Neofelis_nebulosa	31	108	12.5	15	21.5	20.5	32	35.5	13.5	26.5	51.5	9	10
BMNH-47.685	Neofelis_nebulosa	34	109	14.5	15.95	21	21	32	35	13	22.5	50.5	8.5	8.5
BMNH-58.6.24.49	Neofelis_nebulosa	39	114	14.5	16.1	22.5	21.5	36.5	39.5	20	27.5	58	12	8.5
BMNH-30.3.3.4	Neofelis_nebulosa	29	98	12.5	12.8	18	18	30	31.5	16	21	45.5	9	7
BMNH-1977.17	Neofelis_nebulosa	34	101	11	13.85	19	19	31.5	33.5	16	22	44	8.5	8
RCSOM-G16.4	Otocolobus_manul	12	50	6	8.7	10	9	16	18	11	12	27	5	4
BMNH-79.11.21.540	Otocolobus_manul	14	55.5	5.35	9	11	11	18	22.5	11.5	13.5	29	5.2	4.8
BMNH-79.526	Otocolobus_manul	13	55.5	6.3	9.35	11	11	17	20.5	11	12.5	27	5.4	4.15
BCMAG-Aa1894	Panthera_leo	60	192	29	24	36	34	59	65	26.5	39.5	94.5	16	13
BCMAG-Aa3293	Panthera_leo	NA	NA	NA	NA	NA	NA	NA	NA	NA	NA	NA	NA	NA
BCMAG-Aa4746	Panthera_leo	54	188.5	23	25.5	35.5	32	62	65	29	38.5	95	13.5	17
BCMAG-Ab4139	Panthera_leo	61	202	27	26.5	41.5	38.5	66.5	72	35.5	43	106	14	18
BCMAG-Ab4156	Panthera_leo	73	240	35	27	51	45	78	89	38	57.5	114.5	21	22.5
BCMAG-Ab4168	Panthera_leo	59	177	19	28	36.5	34	50.5	59	31	32.5	85	10.5	14
BCMAG-Ab4172	Panthera_leo	60	202	33	24	39.5	34.5	61.5	71	32	45	92	14.5	18.5
BCMAG-Ab4186	Panthera_leo	64	200	29.75	25	39	35	59	64.5	29.5	47	91	27	15
BCMAG-Ac2271	Panthera_leo	76	236	35	27	50.5	46	75	84	36.5	52	117.5	20	20.5
BCMAG-Af1352	Panthera_leo	70	221	30	27	43	40	69.5	77	33	44.5	98.5	17.5	17.5
BCMAG-Af1367	Panthera_leo	78	258.5	39.5	27	47.5	42.5	84.5	82.5	39	53.5	141	18.5	21
BCMAG-Ab2183	Panthera_leo	61	197	23	24.65	40	35	62	70	31.5	39.5	106	16.5	14.5
BRSUVA-LionL-Bullet	Panthera_leo	81	250.5	28.5	29	47.5	45.5	82.5	83.5	33.5	52.5	122	19	18.5
BRSUVA-LionL-noP3	Panthera_leo	80	242	32.5	28.5	51.5	47	70	82.5	39	54	116.5	19	21.5
BRSUVA-LionS-Brown	Panthera_leo	63	206	26.5	27	40	35.5	59.5	67	31	46.5	103.5	23	19.5
BRSUVA-LionS-Red	Panthera_leo	68	196	28.5	25	44	41.5	59	65.5	33.5	45.5	91.5	15	15.5
BMNH-77.857	Panthera_onca	66	190.5	14.5	24.45	42.5	40.5	64.5	68	41.5	45.5	91.5	19.5	16.5
BMNH-89.370	Panthera_onca	63	182.5	21.5	22.6	41.5	38	60.5	62	30.5	42	88	19	15.5
BMNH-1990.542	Panthera_onca	60	171	15.5	22.2	37.5	35	60.5	64.5	32.5	40.5	77.5	19	15.5
BMNH-1935.3.6.2	Panthera_onca	54	155.5	19	19.3	34	31	53.5	57.5	37	33	72.5	15	12
BMNH-1926.12.4.29	Panthera_onca	50	146.5	17.5	18.75	28.5	26	48	53	27.5	29	70.5	12	11
BMNH-1845.8.25.21	Panthera_onca	52	155.5	16	19.2	31	30	56	54.5	25	32	80	12.5	14
BMNH-1936.5.26.3	Panthera_onca	48	142	13	19.35	29	28	44.5	47.5	25.5	31	67	15	11
BMNH-1934.9.10.64	Panthera_onca	50	145.5	9	19.95	28	26	48	54	31	33.5	71.5	16	11.5
BMNH-1874.4.8.2	Panthera_onca	51	153	14	19.1	30.5	28	51	56	29.5	33	74.5	15	12
BMNH-1928.5.2.139	Panthera_onca	55	156.5	12.5	22.2	31.5	31.5	52	54	23.5	32.5	73	14.5	12
BMNH-1870.3.10.19	Panthera_onca	46	146.5	16.5	19.05	29.5	28	52	52.5	26.5	33.5	71	18	11
BMNH-1845.8.25.23	Panthera_onca	59	168	16	NA	31.5	31	59.5	63	31.5	36	83.5	13	14.5
BMNH-1845.8.25.22	Panthera_onca	62	171	16.5	21.2	35	34	61.5	61	34.5	40	88.5	16	13
BMNH-1884.2.8.1	Panthera_onca	52	155	17.5	19.05	33.5	32	50	52.5	27.5	35	78	14	12
BCMAG-Aa1899	Panthera_pardus	44	158.5	19.5	19.15	27.5	25	51	55.5	28.5	30.5	82	10.5	12
BCMAG-Ab3871	Panthera_pardus	37	119	10.5	16	22	21.5	40.5	40.5	22	24.5	62	12	12.5
BCMAG-Ab4129	Panthera_pardus	46	137	13.5	19.5	27	26.3	42.5	45	27	27	61.5	11.5	11
BCMAG-Ab4133	Panthera_pardus	45	150.5	19	18	31	29	47.5	54	28	30	67.5	12	12.5
BCMAG-Ab4137	Panthera_pardus	39	127.5	14	19	24	23	37.5	40.5	22	NA	56	NA	9
BCMAG-Ab4140	Panthera_pardus	44	140.5	17.5	17.4	28	26	46	52	27.5	29	71	12	10
BCMAG-Ad2710	Panthera_pardus	34	123.5	18.5	15.5	22.5	20.5	37.5	40	20.5	26	65.5	7.5	8.5
BCMAG-Af1351	Panthera_pardus	NA	NA	NA	NA	NA	NA	NA	NA	NA	NA	NA	NA	NA
BCMAG-Af1357	Panthera_pardus	37	136.5	13.5	17	26.5	25	44.5	46	24.5	29	69	11	10.5
BCMAG-Af1368	Panthera_pardus	34	112.5	12.5	17	21.25	19.25	34	38	18	19.5	53	6	7
BCMAG-Af1375	Panthera_pardus	33	117	12	17	23.5	21	37	40	19	22	56	8	9
BCMAG-Af1416	Panthera_pardus	34	113	8	17	24	21.5	33.5	36.5	21	23	51.5	10.5	9.5
BCMAG-Ab2185	Panthera_pardus	46	149	16.5	20.1	28	27.5	45.5	47.5	26.5	28	77.5	10.5	10
BRSUVA-LeopardL	Panthera_pardus	38	132	13	17	26	22	45.5	49	25	26	68	10.5	10.5
BRSUVA-LeopardS	Panthera_pardus	NA	NA	NA	NA	NA	NA	NA	NA	NA	NA	NA	NA	NA
BCMAG-Ab2866	Panthera_tigris	78	215.5	30	26.5	43	40	63	76	35	57.5	109	28	18
BCMAG-Ab4126	Panthera_tigris	71	215.5	29.5	25.5	44	38.5	66	75	33.5	57	111.5	26.5	17.5
BCMAG-Ab4130	Panthera_tigris	59	182	22.5	23.5	33.5	30.5	59	65	28	37	92.5	18.5	13
BCMAG-Ab4132	Panthera_tigris	61	191	24.5	25	37	33.5	58.5	66.5	32	45	92	18.5	14
BCMAG-Ab4136	Panthera_tigris	54	156	18	25	31	30.5	45	53.5	23	31	69	12	13
BCMAG-Ab4138	Panthera_tigris	59	179	21.5	25	38	36	57.5	67.5	28	39.5	89	17	13
BCMAG-Ab4143	Panthera_tigris	62	195	20	27	37	36	63	71.5	25.5	44	96	18.5	17.5
BCMAG-Ab4148	Panthera_tigris	55	166	15	22	31	30	50.5	54.5	28.5	34.5	78.5	13	12
BCMAG-Ab4149	Panthera_tigris	58	186	24.5	22	35	31.5	57.5	62	24.5	39	93	18	13.5
BCMAG-Ab4151	Panthera_tigris	72	220.5	29	27	44.5	42.5	74.5	85	39	62	119.5	29.5	14.5
BCMAG-Ab4153	Panthera_tigris	66	224	25	28	43	39	69.5	77.5	34.5	55.5	118.5	22.5	16.5
BCMAG-Ab4154	Panthera_tigris	67	197.5	20	28	39.5	37	65.5	75.5	31	51	104	22.5	14.5
BCMAG-Ab4155	Panthera_tigris	65	186.5	23.5	25	36.5	36	56.5	64.5	29	40.5	90	16	13
BCMAG-Ab4158	Panthera_tigris	71	216.5	27.5	26.5	42	39.5	71	85	30.5	54	117.5	34	17
BCMAG-Ab4173	Panthera_tigris	69	218	26	26	45	43.5	69	70	38	51	110	24.5	16
BCMAG-Ab4175	Panthera_tigris	81	227	23	27	44	42	81	93	40.5	61	125.5	29	17
BCMAG-Ab4184	Panthera_tigris	69	213.5	26	25	35	35.5	69	73	27.5	47	105	25.5	16
BCMAG-Ab4187	Panthera_tigris	73	221	26.5	25.5	44	41.5	78	83.5	35	53	117.5	22	17
BCMAG-Ab4188	Panthera_tigris	55	170.5	24	23.5	32.5	30	49.5	56	27	37.5	82.5	16	13
BCMAG-Ab4189	Panthera_tigris	64	215.5	23.5	28	40.5	38	71.5	79	38	56	107.5	24.5	16.5
BCMAG-Af1420	Panthera_tigris	NA	NA	NA	NA	NA	NA	NA	NA	NA	NA	NA	NA	NA
BCMAG-Ab2184	Panthera_tigris	61	180	20.5	25.45	36	34	55	63	26.5	39	92	19	12.5
BMNH-10.3.10.8	Panthera_tigris	67	206	27	27.85	40.5	37.5	67.5	77	33.5	51	106.5	22	17
BRSUVA-Tiger	Panthera_tigris	72	216.5	24	27	41.5	39.5	69	81	32	56.5	110.5	33	14.5
BMNH-75.2283	Panthera_uncia	41	128.5	9.5	19.55	25.5	25.5	40	42	18	24	63.5	8	9.5
BMNH-81.1498	Panthera_uncia	37	117	8.5	19	24	25.5	35	40	17	22	55.5	8	8
BMNH-1938.6.28.3	Panthera_uncia	37	109	9	16.95	21.5	22	33.5	37	14.5	20.5	53	6.5	9
BMNH-84.2090	Panthera_uncia	36	114	10	16.85	22.5	22.5	36	38.5	17	21	56	7.5	9
BMNH-47.37	Panthera_uncia	32	98.5	7	16.35	19.5	19.5	28	32	14	17	48.5	6	7
BMNH-56.10.1.5	Pardofelis_marmorata	16	54	4.5	9.35	11	11	15.5	20	7.5	11	27	5.05	4.5
BMNH-26.10.4.47	Pardofelis_marmorata	15	54	5	8.75	10	10	15	18.5	7.5	10.5	26.5	4.75	3.9
BMNH-55.1645	Pardofelis_marmorata	19	61	6	8.75	13	12	19.5	24.5	9	14	33	5.4	5.5
BMNH-61.1277	Pardofelis_marmorata	15	55	4	8.8	10.5	10	18	19	8.5	12	25	4.9	4.9
BMNH-95.7.30.4	Pardofelis_marmorata	16	52	4	8.45	10	10	16	22	7	12	26	4.25	4.8
BMNH-32.2.9.1	Pardofelis_marmorata	14	55	5	8.8	10	10	17	21.5	7.5	11	26.5	4.95	4.8
RCSOM-A125.1	Pardofelis_temminckii	25	80.5	10	11.3	16.5	16	24	28.5	12.5	17.5	40.5	7.5	5.5
BMNH-23.1.7.7	Pardofelis_temminckii	27	89	9.45	13.1	17.5	16	28	32	14	19	43	7.5	6.6
BMNH-1868.9.12.1	Pardofelis_temminckii	26	83.5	9.95	11.95	18	17	27.5	29.5	13.5	18	46.5	7	5.8
BMNH-8.8.7.1	Pardofelis_temminckii	29	94.5	12	12.45	18.5	17	30.5	34	15	23	46.5	10	8.5
BMNH-50.510	Pardofelis_temminckii	19	71	9	11.1	13.5	12	23	23.5	11	14.5	37.5	6	5.7
BMNH-32.3.1.33	Pardofelis_temminckii	23	76.5	11	11.05	16	14.5	24	28	11.5	17.5	37.5	7	5.7
RCSOM-A124.54	Prionailurus_bengalensis	NA	NA	NA	NA	NA	NA	NA	NA	NA	NA	NA	NA	NA
BMNH-1938.11.30.27	Prionailurus_bengalensis	13	51	6.2	6.95	9.6	8.3	15	17.5	7.35	11	24.5	5.5	3.6
BMNH-36.5.18.6	Prionailurus_bengalensis	13	51	5.85	7.25	9.25	8.4	15	17	7.7	12	24.5	5	4.2
BMNH-27.12.1.66	Prionailurus_bengalensis	15	63	7.5	8.65	11.6	11	19	21	9.3	14.5	32.5	6.5	4.3
BMNH-27.12.1.72	Prionailurus_bengalensis	14	57.5	6.95	8.3	11	9.95	17	19	9.1	12.5	32	5.15	4.3
BMNH-1938.8.8.2	Prionailurus_bengalensis	16	61	6.7	8.3	12	11	19	21.5	9.3	14	30	6	4.45
BMNH-8.2.26.19	Prionailurus_bengalensis	15	53	5.9	8.2	10.45	9.65	16	18	8.1	12.5	28.5	4.35	3.65
BMNH-70.7.18.25	Prionailurus_bengalensis	13	51.5	6.15	8.05	9.35	8.9	15	17	7.45	12	26	4.5	3.7
BMNH-75.2246	Prionailurus_planiceps	15	61	5.25	8.3	11	10	19.5	19.5	8.3	11.5	32.5	5.5	4.35
BMNH-92.10.1.2	Prionailurus_planiceps	18	64.5	5.4	8.55	12	11	22	20	10	13	34	5.7	4.9
BMNH-72.8.19.18	Prionailurus_planiceps	17	67	5.6	7.8	11	10	23.5	22.5	10.5	12	32	5.05	4.6
BMNH-29.3.9.1	Prionailurus_planiceps	15	62	5.3	8.1	10	9.55	19.5	19.5	8.45	11	33	5.05	4.45
BMNH-60.5.4.51	Prionailurus_planiceps	16	59	5.25	8.25	10	9.5	17.5	16.5	8	10.5	27.5	4.35	4.2
BMNH-79.11.21.627	Prionailurus_planiceps	18	64	6.5	8.15	11.5	10.5	20.5	20	9.35	11.5	29	5	4.8
BMNH-61.1276	Prionailurus_planiceps	18	59	4.5	8.3	11	10.5	20	19.5	9	11.5	27	5.55	4.45
RCSOM-A124.6	Prionailurus_rubiginosus	11	45	5	6.8	8.55	8.1	14	15.5	7.5	11	22.5	5.5	3
RCSOM-A124.61	Prionailurus_rubiginosus	11	47	5.5	6.95	9.35	8.7	14.5	16	7	11.5	23	5	3
RCSOM-A124.62	Prionailurus_rubiginosus	11	47	5	6.2	8.8	8.15	15	17	7.5	11	24.5	5	4
RCSOM-A124.63	Prionailurus_rubiginosus	10	41	4	6.6	8.2	7.85	13	14.5	7	9.5	20.5	4	3
RCSOM-A124.64	Prionailurus_rubiginosus	10	42.5	5	6.3	8.5	8.05	12.5	14.5	6	9.5	21	4.5	3
BMNH-20.2.8.5	Prionailurus_rubiginosus	11	43.5	4.15	6.7	8.65	7.9	14	15.5	5.9	11	22	4.95	3.05
BMNH-15.3.1.49	Prionailurus_rubiginosus	11	45	5.3	6.95	8.9	8.15	14	15	7.2	10	21	4.9	3.75
BMNH-66.5.8.1	Prionailurus_rubiginosus	10	43.5	4.65	6.9	8.7	8.1	14	15	7.45	11	21.5	5.1	3.45
BMNH-34.4.17.2	Prionailurus_rubiginosus	11	44	5.9	6.75	8.25	7.65	12.5	14.5	6.25	10	22	4.5	2.95
RCSOM-A124.71	Prionailurus_viverrinus	24	91.5	10	11.3	18	17	31	30.5	16	21.5	45.5	8.5	6.5
RCSOM-A124.7	Prionailurus_viverrinus	20	76.5	8.5	10.75	14	13.5	25	25	14.5	18	39	7.5	5.5
RCSOM-G16.31	Prionailurus_viverrinus	21	81.5	9	10.8	16	15	27.5	28.5	15.5	21	40	9	7
BMNH-75.2286	Prionailurus_viverrinus	25	89	11	11.15	19	18	31	32.5	18.5	21	45.5	10	7.15
BMNH-14.1.19.1	Prionailurus_viverrinus	23	84.5	8	11.3	16.5	16	27.5	28.5	15.5	19.5	42.5	10	6.1
BMNH-43.1.12.120	Prionailurus_viverrinus	22	80	9.05	10.1	16	15	26	26.5	14	18	39.5	7.45	6.05
RCSOM-A123.4	Puma_concolor	37	137	11.5	18	26.5	24	50.5	49	27.5	33	78.5	13	11
RCSOM-G98.12	Puma_concolor	34	104	10.5	15.7	21	19.5	33	36	18.5	24	52	9	9.5
RCSOM-A123.31	Puma_concolor	37	111.5	6.5	15.75	25	23.5	39.5	46	20.5	27	61	14	7.5
BMNH-1837.3.15.17	Puma_concolor	35	114	9.25	17.35	23.5	21	39	42.5	22	27	63	11	8.5
BMNH-1858.5.4.56	Puma_concolor	37	117	10.5	16.55	22	20	36	37.5	21	25	54	11	8
BMNH-1850.11.22.46	Puma_concolor	34	107.5	11	15.3	24	22	36.5	41	18	25.5	56.5	12.5	8.25
BMNH-1901.11.14.1	Puma_concolor	48	143.5	13	19.6	31	29	47	53.5	24.5	39.5	75	17.5	10
BMNH-11.8.21.1	Puma_concolor	43	143	12	19.5	27.5	25.5	50	50.5	20	36	79	17	9.5
BMNH-1901.3.21.15	Puma_concolor	36	128.5	13	18.05	25.5	23.5	40.5	47	20.5	34	72.5	15.5	10.5
BMNH-1926.12.4.100	Puma_concolor	36	126	12	16	23.5	23	41	46.5	22	32	64	13	9
BMNH-1926.1.12.3	Puma_concolor	30	105.5	10	15.1	20	19	33	39.5	18.5	25.5	53	11.5	8
BMNH-52.1084.a	Puma_concolor	39	119	10	17.35	26	23.5	40	44	19	33	68	13	8
BMNH-40.692	Puma_concolor	39	130	12.5	18.35	25.5	22.5	42	47	22	31	68	15	9
BRSUVA-Puma	Puma_concolor	NA	NA	NA	NA	NA	NA	NA	NA	NA	NA	NA	NA	NA
BMNH-1908.6.17.11	Puma_yagouaroundi	18	61	7	9.15	12.5	11.5	19	21	11	13	29.5	4	4
BMNH-1934.9.2.33	Puma_yagouaroundi	17	59.5	5.5	8.95	12	10	20	21	11	14.5	33	4	4
BMNH-1934.9.2.32	Puma_yagouaroundi	16	60.5	6	9.1	12	11	20.5	21.5	13.5	14	35.5	4	5
BMNH-1926.1.12.8	Puma_yagouaroundi	14	54.5	4.5	8.55	11	10	17.5	19	9	13.5	30	4	4
BMNH-1926.1.12.7	Puma_yagouaroundi	14	51.5	5	8.5	10	9	15	17.5	8	12	26.5	3.5	4
BMNH-1923.8.9.8	Puma_yagouaroundi	16	55	4	9.55	11	10	17	19.5	10	14.5	27.5	4.5	4
BMNH-1886.1.19.1	Puma_yagouaroundi	16	58	5	9.15	11.5	10.5	18.5	19.5	10	14.5	30.5	4	4
BMNH-1926.1.8.9	Puma_yagouaroundi	19	63.5	4	10.45	12.5	11.5	22	20	12	16	32	4	5
MS.Jaguarundi	Puma_yagouaroundi	16	63	6.4	8.5	12.5	11.5	19.5	21	10	15	32	5.5	5
UoP-Jaguar	Anomalous_Jaguar	55	159	13.5	20.95	33	31.5	55	55	32.5	34.5	71.5	14	12.5
UoP-Tiger	Peruvian_Tiger	48	141	16	18.35	28	26.5	44.5	47.5	28.5	32	66	14	12

## Sheet: standardised_data_cranial
Standardised cranial measurements of 293 specimens (excluding missing values): each raw value was divided by the geometric mean for that specimen
Specimen	Taxa	LSkT	LFr	LPa.Oc	Lface	Wiof	Wo	WPOC	WPOP	WBC	Wsn	WC1s	WNA	LN	LNT	WMFS	LCdBs	LBsCr	WIC1s	WI3s.I3s	LC1sP3s	Wsk	WP4s.P4s	Wpal	Lpal	LPMMX	WPN	WPN.ant	WMP	WPocP	dAB.ant	dAB.post	WOC	HOC	WFM	WFMV	LP4s
BMNH-1926.6.4.4	Acinonyx_jubatus	4.26453	1.61535	1.44305	2.04611	1.37843	0.99075	1.27074	1.91689	1.5292	1.31382	1.14152	0.710755	0.99075	1.3569	0.452299	3.83377	1.29228	0.624603	0.473837	0.0969212	3.03686	1.63689	1.74458	1.7015	1.09844	0.538451	0.473837	1.63689	1.22767	0.430761	0.732293	0.904598	0.495375	0.452299	0.387685	0.509375
BMNH-1926.6.4.5	Acinonyx_jubatus	4.26197	1.54601	1.58779	2.06831	1.35798	0.981924	1.25352	1.85939	1.5669	1.2953	1.08638	0.668544	1.00282	1.37887	0.480516	3.78145	1.25352	0.605868	0.41784	0.114906	3.07112	1.58779	1.69225	1.69225	1.06549	0.543192	0.480516	1.60868	1.21174	0.501408	0.73122	0.919248	0.459624	0.459624	0.41784	0.488873
BMNH-1931.1.3.3	Acinonyx_jubatus	4.26688	1.66184	1.54955	1.95378	1.36989	0.988119	1.23515	1.77412	1.59447	1.30252	1.10041	0.696175	0.89829	1.28006	0.49406	3.77282	1.28006	0.65126	0.449145	0.101058	2.9419	1.66184	1.72921	1.72921	1.05549	0.538974	0.516517	1.68429	1.21269	0.449145	0.718632	0.89829	0.449145	0.49406	0.404231	0.53336
BMNH-1931.1.2.9	Acinonyx_jubatus	4.22923	1.53127	1.48266	1.99309	1.33683	0.947931	1.36113	1.77433	1.6528	1.31252	1.11807	0.65626	0.972237	1.28821	0.461813	3.81603	1.26391	0.65626	0.461813	0.0729178	2.91671	1.6285	1.67711	1.67711	1.02085	0.53473	0.53473	1.6285	1.2153	0.510425	0.802096	0.899319	0.510425	0.510425	0.437507	0.537161
BMNH-1942.60	Acinonyx_jubatus	4.26775	1.47339	1.65121	2.08307	1.37178	0.990727	1.29557	1.75282	1.65121	1.32097	1.09234	0.711291	1.06694	1.42258	0.482662	3.73428	1.27016	0.635081	0.457259	0.0762098	2.94678	1.62581	1.72742	1.72742	1.06694	0.508065	0.482662	1.67662	1.24476	0.457259	0.736695	0.863711	0.457259	0.508065	0.406452	0.536009
BMNH-1935.2.3.1	Acinonyx_jubatus	4.2839	1.60083	1.55573	2.11941	1.28517	0.992062	1.28517	1.69101	1.57828	1.24008	1.08225	0.744047	1.01461	1.37536	0.586219	3.83297	1.21753	0.608765	0.450937	0.0901875	2.95364	1.57828	1.66847	1.71356	1.03716	0.541125	0.496031	1.62337	1.26262	0.42839	0.698953	0.946968	0.473484	0.473484	0.450937	0.491522
BMNH-1905.8.13.1	Acinonyx_jubatus	4.20271	1.60818	1.50097	1.9727	1.30799	0.964909	1.22222	1.75828	1.58674	1.30799	1.13645	0.686157	0.922024	1.2651	0.514618	3.75242	1.24366	0.62183	0.428848	0.128655	2.91617	1.60818	1.73684	1.75828	1.07212	0.557503	0.493176	1.60818	1.24366	0.514618	0.771927	0.879139	0.514618	0.407406	0.385964	0.496392
BMNH-39.536	Acinonyx_jubatus	4.22356	1.38477	1.70789	2.031	1.36169	0.992421	1.33861	1.86944	1.66173	1.29246	1.10782	0.669307	0.969341	1.33861	0.461591	3.76197	1.2463	0.646228	0.461591	0.0923182	2.95418	1.61557	1.73097	1.73097	1.15398	0.553909	0.553909	1.59249	1.15398	0.438512	0.715466	0.807785	0.484671	0.461591	0.415432	0.540062
BMNH-43.56	Acinonyx_jubatus	4.227	1.68591	1.31941	1.95468	1.29498	0.977341	1.36828	1.80808	1.58818	1.22168	1.07507	0.708572	0.879607	1.27054	0.537537	3.81163	1.19724	0.635272	0.464237	0.122168	2.78542	1.63705	1.68591	1.71035	1.12394	0.537537	0.561971	1.61261	1.29498	0.41537	0.684139	0.855173	0.439803	0.48867	0.439803	0.555863
RCSOM-A125.21	Caracal_aurata	4.42288	1.55399	2.07198	1.59383	1.07584	0.75707	1.23522	1.55399	1.99229	1.03599	0.996145	0.47815	0.876608	1.03599	0.278921	4.06427	1.31491	0.557841	0.47815	0.179306	2.82905	1.71337	1.83291	1.75322	1.07584	0.398458	0.438304	1.87275	1.55399	0.358612	0.876608	1.11568	0.517996	0.677379	0.677379	0.623587
RCSOM-A125.2	Caracal_aurata	4.57641	1.62255	2.205	1.62255	1.04009	0.66566	1.20651	1.37292	1.95538	1.1233	1.0817	0.457641	0.915282	1.0817	0.291226	4.20198	1.33132	0.540848	0.499245	0.208019	2.78745	1.78896	1.91377	1.87217	1.0817	0.416037	0.416037	1.83056	1.49773	0.374434	0.832075	1.1233	0.457641	0.624056	0.582452	0.624056
RCSOM-A125.23	Caracal_aurata	4.42259	1.5795	2.01386	1.65847	1.14513	0.789748	1.2636	1.69796	1.93488	1.14513	1.02667	0.434361	0.90821	1.10565	0.315899	4.0672	1.38206	0.552823	0.473849	0.197437	2.76412	1.73745	1.81642	1.77693	1.02667	0.394874	0.394874	1.81642	1.54001	0.355386	0.829235	1.06616	0.513336	0.631798	0.552823	0.619952
BMNH-25.10.7.13	Caracal_aurata	4.59789	1.49931	2.13235	1.76586	1.13281	0.766315	0.899587	1.73254	1.69922	1.13281	1.13281	0.533089	0.966223	1.16613	0.299862	4.13144	1.36604	0.599725	0.466452	0.133272	3.03194	1.76586	1.89913	1.73254	1.03286	0.433134	0.433134	1.89913	1.49931	0.399816	0.866269	1.0995	0.466452	0.633043	0.533089	0.591395
BMNH-1938.3.29.1	Caracal_aurata	4.6594	1.564	2.08533	1.72691	1.10783	0.814581	0.879747	1.59658	1.66174	1.14041	1.07525	0.488749	0.912331	1.10783	0.358416	4.2684	1.49883	0.586498	0.423582	0.260666	2.96507	1.62916	1.75949	1.85724	1.04266	0.423582	0.390999	1.88983	1.49883	0.390999	0.847164	1.01008	0.423582	0.586498	0.586498	0.534365
RCSOM-A121.1	Caracal_caracal	4.16757	1.56729	1.81663	1.60291	1.24671	0.854887	1.06861	1.53167	1.78101	1.21109	1.06861	0.498684	0.890507	1.06861	0.356203	3.81137	1.28233	0.641165	0.463064	0.160291	2.9921	1.78101	1.88787	1.67415	1.03299	0.534304	0.569924	1.85225	1.42481	0.427443	0.748026	0.961747	0.463064	0.569924	0.498684	0.587734
RCSOM-A121.11	Caracal_caracal	4.35614	1.45205	1.92298	1.60903	1.21658	0.902624	1.17734	1.72676	1.84449	1.21658	1.13809	0.470934	0.941869	1.17734	0.353201	4.04219	1.25583	0.549423	0.510179	0.156978	3.10032	1.88374	2.04072	1.766	0.981113	0.43169	0.43169	1.88374	1.45205	0.43169	0.784891	1.02036	0.392445	0.549423	0.470934	0.588668
RCSOM-A121.12	Caracal_caracal	4.34082	1.60112	1.88576	1.70786	1.24532	0.925092	1.17416	1.56554	1.77902	1.2809	1.10299	0.426966	0.960673	1.13857	0.284644	4.02059	1.2809	0.640448	0.462546	0.142322	3.05992	1.8146	1.88576	1.74344	0.960673	0.462546	0.498127	1.88576	1.42322	0.498127	0.818351	0.960673	0.462546	0.533707	0.498127	0.556834
RCSOM-A121.13	Caracal_caracal	4.50258	1.5759	1.994	1.70455	1.18997	0.900515	1.02916	1.86535	1.70455	1.18997	1.06132	0.482419	0.964838	1.18997	0.353774	4.05232	1.35077	0.578903	0.482419	0.192968	3.24829	1.70455	1.83319	1.73671	1.02916	0.450258	0.450258	1.80103	1.4151	0.385935	0.804031	0.932676	0.450258	0.546741	0.450258	0.538701
RCSOM-A121.2	Caracal_caracal	4.18674	1.59319	1.77844	1.66729	1.18563	0.778067	1.18563	1.51908	1.88959	1.18563	1.07447	0.481661	0.926271	1.14858	0.333457	3.85329	1.25973	0.555762	0.481661	0.129678	2.81586	1.77844	1.85254	1.66729	0.963321	0.518712	0.555762	1.85254	1.51908	0.481661	0.815118	1.03742	0.481661	0.592813	0.518712	0.602076
RCSOM-A121.15	Caracal_caracal	4.17168	1.36382	2.08584	1.6446	1.24348	0.842358	1.36382	1.72483	1.88528	1.16326	1.00281	0.481348	0.962695	1.16326	0.361011	3.81067	1.24348	0.601684	0.441235	0.220618	2.80786	1.68472	1.88528	1.60449	0.882471	0.52146	0.561572	1.76494	1.44404	0.441235	0.762134	1.00281	0.481348	0.52146	0.441235	0.497392
RCSOM-A121.3	Caracal_caracal	4.29062	1.65603	1.88185	1.61839	1.12911	0.865652	1.12911	1.65603	1.91949	1.16675	1.05384	0.451644	0.903289	1.12911	0.338733	3.91425	1.27966	0.602192	0.451644	0.207004	2.93569	1.69367	1.80658	1.7313	1.05384	0.451644	0.451644	1.88185	1.50548	0.37637	0.828015	1.0162	0.451644	0.602192	0.526918	0.566437
RCSOM-A121.22	Caracal_caracal	4.12939	1.61937	1.94324	1.57889	1.21453	0.688232	1.2955	1.5384	1.98373	1.17404	1.09307	0.445327	0.931138	1.09307	0.242905	3.80552	1.25501	0.566779	0.485811	0.141695	2.8339	1.78131	1.94324	1.65985	0.971622	0.526295	0.526295	1.86228	1.57889	0.445327	0.809685	1.13356	0.445327	0.607264	0.607264	0.647748
RCSOM-A120.21	Felis_chaus	4.40898	1.5719	2.03197	1.61024	1.18851	0.805118	1.26519	1.87861	1.91695	1.11183	0.996813	0.536746	0.920135	1.07349	0.345051	4.06393	1.3802	0.575084	0.460068	0.210864	2.87542	1.61024	1.72525	1.72525	0.881796	0.460068	0.536746	1.76359	1.3802	0.38339	0.72844	0.996813	0.460068	0.613423	0.536746	0.517576
BMNH-19.7.7.3494	Felis_chaus	4.45786	1.60204	1.88066	1.74135	1.18412	0.801022	1.32343	1.95032	1.77618	1.14929	1.11447	0.487579	1.07964	1.25377	0.243789	4.03994	1.32343	0.626887	0.452752	0.243789	2.89065	1.77618	1.88066	1.70653	0.940331	0.452752	0.557233	1.70653	1.39308	0.313444	0.766195	0.940331	0.452752	0.487579	0.522406	0.532854
BMNH-1909.7.1.15	Felis_chaus	4.45672	1.62062	1.89073	1.78944	1.18171	0.776549	1.21547	1.99202	1.75568	1.18171	1.11418	0.506445	1.11418	1.31676	0.202578	4.05156	1.31676	0.641497	0.405156	0.253223	2.93738	1.65439	1.78944	1.72191	1.08042	0.438919	0.540208	1.68815	1.41805	0.371393	0.742786	0.979127	0.506445	0.506445	0.472682	0.501381
BMNH-77.858	Felis_chaus	4.4622	1.55658	1.90249	1.79872	1.1069	0.760995	1.21067	1.83331	1.79872	1.1069	1.07231	0.51886	1.07231	1.24526	0.242135	4.04711	1.24526	0.622632	0.415088	0.276725	2.80185	1.69494	1.79872	1.72953	1.00313	0.449679	0.51886	1.8679	1.45281	0.345907	0.760995	1.00313	0.48427	0.51886	0.51886	0.539615
BMNH-32.2.1.76	Felis_chaus	4.55906	1.57813	1.89376	1.82362	1.22744	0.806602	1.26251	1.92883	1.78855	1.12223	1.08716	0.490975	1.01702	1.29758	0.210418	4.13822	1.33265	0.631254	0.420836	0.280557	2.91078	1.71841	1.75348	1.71841	0.946881	0.420836	0.526045	1.78855	1.47293	0.350697	0.771532	0.98195	0.455906	0.526045	0.490975	0.524291
BMNH-1936.4.14.35	Felis_chaus	4.54746	1.54877	2.01011	1.81239	1.21925	0.856767	1.15334	2.01011	1.71353	1.18629	1.15334	0.494289	1.08744	1.3181	0.230668	4.05317	1.2522	0.626099	0.428384	0.214192	2.96573	1.74649	1.81239	1.71353	0.955625	0.461336	0.560194	1.74649	1.38401	0.296573	0.790862	0.955625	0.461336	0.560194	0.494289	0.523946
BMNH-8.1.13.4	Felis_chaus	4.39938	1.63517	1.86876	1.63517	1.12904	0.700786	1.32371	1.82983	1.9077	1.09011	1.01225	0.467191	0.973314	1.16798	0.233595	3.97112	1.20691	0.583989	0.428258	0.350393	2.80315	1.6741	1.7909	1.71303	0.973314	0.545056	0.622921	1.7909	1.44051	0.350393	0.778651	0.973314	0.467191	0.583989	0.506123	0.480817
BMNH-4.6.1.1	Felis_chaus	4.47383	1.68282	1.97013	1.72386	1.19029	0.738798	1.35446	1.88804	1.92908	1.02611	1.02611	0.451488	1.02611	1.19029	0.246266	4.10443	1.31342	0.574621	0.451488	0.328355	2.83206	1.64177	1.76491	1.72386	0.94402	0.451488	0.533577	1.80595	1.4776	0.246266	0.738798	1.02611	0.492532	0.615665	0.533577	0.529472
BMNH-22.5.16.27	Felis_chaus	4.45295	1.74937	1.82889	1.66986	1.19275	0.79517	1.39155	1.86865	1.82889	1.11324	1.03372	0.477102	0.993962	1.153	0.278309	4.05536	1.35179	0.596377	0.437343	0.278309	2.90237	1.66986	1.74937	1.66986	0.954203	0.437343	0.556619	1.78913	1.39155	0.278309	0.755411	0.993962	0.477102	0.556619	0.556619	0.528788
BMNH-29.10.19.1	Felis_chaus	4.62624	1.69629	2.04326	1.81194	1.19511	0.848144	1.34932	2.12036	1.8505	1.07946	1.0409	0.424072	1.07946	1.27222	0.231312	4.12506	1.31077	0.616832	0.424072	0.346968	2.92995	1.58063	1.69629	1.69629	0.9638	0.424072	0.539728	1.77339	1.34932	0.346968	0.693936	0.925248	0.462624	0.501176	0.501176	0.47419
BMNH-25.6.10.12	Felis_chaus	4.39997	1.60338	1.86439	1.67795	1.2305	0.820333	1.30508	1.97626	1.86439	1.19321	1.11864	0.447454	1.00677	1.2305	0.223727	3.9898	1.2305	0.633894	0.410166	0.298303	2.98303	1.64067	1.75253	1.67795	0.932197	0.447454	0.52203	1.78982	1.45423	0.372879	0.745757	0.969484	0.52203	0.559318	0.52203	0.441861
BMNH-12.6.28.11	Felis_chaus	4.25313	1.61041	1.77558	1.69299	1.1149	0.701973	1.40395	1.94075	1.94075	1.1149	1.07361	0.454218	1.03231	1.19748	0.247755	3.8815	1.32136	0.619388	0.454218	0.268402	2.72531	1.56912	1.6517	1.6517	0.949729	0.495511	0.536803	1.81687	1.40395	0.412926	0.784558	1.03231	0.495511	0.578096	0.536803	0.470735
BMNH-32.2.1.39	Felis_chaus	4.48578	1.82754	1.91061	1.61986	1.12144	0.706094	1.41219	1.99368	1.86907	1.07991	1.03837	0.49842	0.955304	1.16298	0.207675	4.07043	1.32912	0.58149	0.41535	0.290745	2.74131	1.70293	1.786	1.6614	0.955304	0.49842	0.58149	1.786	1.45372	0.33228	0.747629	0.996839	0.49842	0.58149	0.49842	0.542031
BMNH-32.2.1.64	Felis_chaus	4.45461	1.68098	1.76503	1.68098	1.09264	0.714418	1.38681	1.97516	1.93313	1.00859	0.966566	0.462271	0.966566	1.17669	0.210123	4.16044	1.34479	0.588345	0.462271	0.378222	2.81565	1.68098	1.76503	1.72301	0.966566	0.462271	0.54632	1.80706	1.34479	0.378222	0.798468	1.00859	0.462271	0.54632	0.54632	0.489587
BMNH-32.2.1.59	Felis_chaus	4.52861	1.70816	1.94651	1.74788	1.15201	0.794492	1.31091	2.1054	1.82733	1.15201	1.03284	0.436971	1.03284	1.23146	0.278072	4.09163	1.35064	0.595869	0.476695	0.25821	3.09852	1.70816	1.86706	1.66843	0.953391	0.436971	0.556145	1.74788	1.39036	0.317797	0.715043	0.873941	0.476695	0.51642	0.476695	0.510461
BMNH-14.8.22.17	Felis_chaus	4.34455	1.69437	1.86816	1.52059	1.21647	0.825464	1.47715	2.08538	1.95505	1.08614	1.04269	0.4779	0.86891	1.04269	0.217227	3.95354	1.25992	0.608237	0.4779	0.304118	2.95429	1.73782	1.86816	1.60748	0.912355	0.434455	0.564791	1.82471	1.4337	0.391009	0.782019	0.955801	0.4779	0.564791	0.4779	0.495278
BMNH-14.7.19.86	Felis_chaus	4.59438	1.91094	1.9516	1.58567	1.21975	0.772507	1.4637	1.82962	1.87028	1.13843	1.09777	0.447241	0.894482	1.05711	0.162633	4.1878	1.38238	0.609874	0.406583	0.284608	3.09003	1.78896	1.87028	1.66699	0.93514	0.447241	0.569216	1.78896	1.4637	0.365924	0.772507	1.01646	0.447241	0.569216	0.528557	0.534656
BMNH-1934.3.24.14	Felis_chaus	4.54016	1.75234	1.95147	1.63286	1.15495	0.796519	1.39391	1.95147	1.91164	1.11513	1.0753	0.477911	0.955822	1.15495	0.238956	4.10207	1.35408	0.597389	0.438085	0.278782	2.94712	1.67269	1.83199	1.67269	0.995648	0.477911	0.557563	1.79217	1.47356	0.238956	0.796519	0.995648	0.477911	0.597389	0.517737	0.454016
BMNH-67.1429	Felis_margarita	4.31056	1.43685	1.88277	1.73413	1.13957	0.792747	1.58549	2.32869	2.08096	1.09003	0.990933	0.490512	1.09003	1.28821	0.29728	4.01328	1.33776	0.545013	0.341872	0.232869	3.17099	1.58549	1.73413	1.4864	0.990933	0.431056	0.495467	1.98187	1.63504	0.232869	0.792747	0.990933	0.465739	0.644107	0.545013	0.52024
BMNH-59.634	Felis_margarita	4.09553	1.28848	1.8867	1.70264	1.19645	0.874326	1.42653	2.39289	1.97874	1.15043	1.10441	0.432561	1.05839	1.24246	0.257696	3.91146	1.3345	0.690258	0.372739	0.232387	3.40527	1.74865	1.93272	1.47255	0.966361	0.450968	0.506189	2.07077	1.6106	0.262298	0.736275	0.920343	0.460172	0.552206	0.506189	0.503888
BMNH-2.12.1.5	Felis_nigripes	4.14427	1.82994	1.82994	1.45319	1.13026	0.807325	1.72229	2.26051	2.20669	1.18408	1.02261	0.452102	0.861147	1.07643	0.145319	3.82134	1.29172	0.64586	0.39828	0.290637	3.12166	1.72229	1.82994	1.50701	0.807325	0.44672	0.538217	1.9914	1.50701	0.387516	0.807325	1.02261	0.457484	0.699682	0.516688	0.508615
BMNH-39.679	Felis_nigripes	4.15291	1.73038	1.84574	1.3843	1.15359	0.80751	1.73038	2.19181	2.24949	1.15359	1.03823	0.432594	0.865189	1.03823	0.149966	3.92219	1.32662	0.634472	0.47297	0.245137	3.057	1.78806	1.90342	1.55734	0.865189	0.438362	0.559489	2.01877	1.55734	0.328772	0.80751	1.03823	0.421059	0.692151	0.553721	0.533533
BMNH-2.12.1.4	Felis_nigripes	4.22936	1.81258	1.81258	1.48302	1.15346	0.823901	1.70273	2.19707	2.252	1.15346	1.04361	0.428429	0.878828	1.04361	0.115346	3.84487	1.26332	0.659121	0.428429	0.282873	3.13082	1.75766	1.81258	1.53795	0.823901	0.483355	0.604194	1.97736	1.53795	0.357024	0.714048	1.04361	0.461385	0.659121	0.604194	0.521804
HM-NH.35.95	Felis_silvestris	4.12707	1.48766	1.87158	1.53565	1.10375	0.815816	1.63163	2.25549	2.06353	1.05576	1.00777	0.479892	1.00777	1.05576	0.239946	3.79114	1.19973	0.623859	0.431902	0.256742	2.95133	1.67962	1.82359	1.53565	0.911794	0.479892	0.527881	1.87158	1.3437	0.407908	0.767826	1.05576	0.431902	0.671848	0.57587	0.453498
BCMAG-Af1371	Felis_silvestris	4.25069	1.41371	2.01549	1.5952	1.1558	0.788049	1.35162	2.25907	1.93908	1.13192	1.09849	0.444173	0.979091	1.19401	0.186266	3.95457	1.25133	0.630439	0.434621	0.288951	2.92294	1.67162	1.86266	1.6955	0.93133	0.501486	0.525366	1.83878	1.50446	0.429845	0.716408	0.964763	0.429845	0.597007	0.501486	0.50865
BCMAG-Af1374	Felis_silvestris	4.13184	1.09476	2.01799	1.64971	1.10485	0.746656	1.54376	2.2097	1.96754	1.0998	1.04431	0.443958	1.09476	1.31169	0.206844	3.8695	1.28647	0.645757	0.479273	0.234591	2.83023	1.74052	1.84646	1.58412	0.923231	0.474228	0.454048	1.9625	1.51349	0.454048	0.807196	1.03422	0.418733	0.640712	0.504498	0.501975
BCMAG-Af1382	Felis_silvestris	4.08042	1.62257	1.9442	1.38734	1.12332	0.787282	1.48815	2.16982	1.9394	1.10411	1.0081	0.417643	0.86409	1.05611	0.230424	3.74439	1.21453	0.614464	0.446446	0.295231	2.70748	1.68978	1.82419	1.56496	0.945698	0.528055	0.57606	1.83859	1.51696	0.432045	0.86409	0.993703	0.446446	0.648067	0.528055	0.472849
HM-NH.74.5.15	Felis_silvestris	4.1567	1.31487	1.99352	1.61178	1.18763	0.827098	1.27246	2.24801	1.82386	1.14521	1.06038	0.424153	0.975552	1.14521	0.296907	3.81738	1.27246	0.636229	0.466568	0.290545	3.0539	1.69661	1.9511	1.6542	0.933137	0.424153	0.551399	1.90869	1.3997	0.381738	0.827098	0.975552	0.381738	0.551399	0.551399	0.445361
HM-NH.74.5.16	Felis_silvestris	4.21411	1.38342	1.9155	1.57497	1.10674	0.851335	1.31957	2.1709	1.9155	1.10674	1.06417	0.425668	1.0216	1.1493	0.255401	3.91614	1.277	0.638501	0.425668	0.270299	3.02224	1.6601	1.87294	1.61754	0.936469	0.468234	0.553368	1.83037	1.44727	0.425668	0.744918	1.0216	0.425668	0.595935	0.532084	0.466106
HM-NH.74.5.22	Felis_silvestris	4.26919	1.39402	1.91678	1.56827	1.17621	0.8277	1.26333	2.26529	1.82965	1.17621	1.08908	0.435632	1.00195	1.13264	0.261379	3.92069	1.26333	0.653448	0.435632	0.263557	3.09299	1.69896	1.91678	1.56827	0.95839	0.479195	0.522758	1.87322	1.43758	0.392069	0.740574	0.95839	0.479195	0.566321	0.522758	0.442166
HM-NH.74.5.23	Felis_silvestris	4.17238	1.36241	1.95846	1.53271	1.19211	0.808931	1.31983	2.12876	1.78816	1.19211	1.02181	0.425753	1.02181	1.14953	0.298027	3.87435	1.27726	0.638629	0.425753	0.317186	2.89512	1.70301	1.87331	1.70301	0.979232	0.468328	0.510904	1.78816	1.49014	0.383178	0.72378	1.02181	0.468328	0.553479	0.510904	0.423624
HM-NH.74.5.27	Felis_silvestris	4.14019	1.29983	1.97381	1.58868	1.10726	0.770269	1.34797	2.02196	1.97381	1.10726	1.05912	0.433276	1.01098	1.1554	0.240709	3.75506	1.1554	0.625843	0.433276	0.257559	2.98479	1.7331	1.92567	1.54054	0.914694	0.481418	0.52956	1.87753	1.34797	0.433276	0.81841	1.05912	0.433276	0.673985	0.577701	0.519931
HM-NH.74.5.29	Felis_silvestris	4.28813	1.68634	2.02361	1.49362	1.15635	0.819081	1.5418	2.26452	1.92725	1.15635	0.963625	0.481812	0.915444	1.05999	0.240906	3.95086	1.30089	0.578175	0.38545	0.354132	2.89087	1.68634	1.87907	1.63816	0.963625	0.433631	0.481812	1.83089	1.39726	0.289087	0.722719	1.05999	0.481812	0.626356	0.578175	0.472176
BRSUVA-Cat-CHAIRO	Felis_silvestris	4.19225	1.42623	1.94486	1.46945	1.25335	0.821163	1.46945	2.24739	1.90164	1.25335	1.1237	0.47541	0.821163	0.907601	0.302534	3.88972	1.25335	0.691506	0.423547	0.276602	3.02534	1.72876	1.90164	1.64233	0.95082	0.432191	0.47541	1.85842	1.46945	0.432191	0.777944	0.994039	0.47541	0.561848	0.47541	0.410581
BRSUVA-T.1.543	Felis_silvestris	4.20589	1.28752	1.97419	1.67377	1.20168	0.815427	1.33043	2.18878	1.88836	1.20168	1.07293	0.429172	1.07293	1.20168	0.257503	3.86255	1.20168	0.643759	0.429172	0.214586	3.00421	1.80252	1.93128	1.54502	0.944179	0.47209	0.515007	1.88836	1.45919	0.386255	0.729593	1.03001	0.429172	0.600841	0.557924	0.480673
BCMAG-Ab4632	Felis_silvestris	4.15827	1.59562	1.83738	1.45056	1.1121	0.821984	1.45056	2.03079	1.98243	1.1121	1.06374	0.435168	0.821984	0.96704	0.265936	3.91651	1.25715	0.652752	0.48352	0.275607	2.80442	1.64397	1.74067	1.59562	0.96704	0.48352	0.531872	1.88573	1.49891	0.386816	0.773632	1.01539	0.507696	0.652752	0.531872	0.471432
BCMAG-Ab4598	Felis_silvestris	4.10397	1.4385	1.9039	1.52312	1.22696	0.833487	1.48928	2.01391	1.94621	1.22696	1.01542	0.47386	0.973106	1.18465	0.253854	3.78665	1.26927	0.668482	0.42309	0.247507	2.87701	1.67967	1.77698	1.56543	0.888488	0.47386	0.465399	1.86159	1.3962	0.42309	0.930797	1.04503	0.380781	0.634635	0.528862	0.467514
BCMAG-Af1372	Felis_silvestris	4.26939	1.3365	2.08365	1.62422	1.16016	0.802831	1.39219	2.40385	1.84233	1.16016	1.06735	0.473345	0.969894	1.20657	0.199547	3.89814	1.20657	0.64969	0.454783	0.280759	3.06282	1.69847	1.94907	1.62422	0.881722	0.487267	0.556877	1.8841	1.42932	0.394454	0.788909	0.928128	0.417658	0.556877	0.51047	0.464064
BCMAG-Af1383	Felis_silvestris	4.18561	1.43852	1.89114	1.62674	1.14275	0.838018	1.443	2.16899	1.92251	1.15171	1.06657	0.457101	1.00383	1.20997	0.22855	3.88984	1.27271	0.622912	0.501914	0.253198	2.9353	1.6133	1.79255	1.64915	0.985903	0.461582	0.492952	1.91803	1.47885	0.35851	0.761834	0.967978	0.425731	0.596023	0.537765	0.477267
HM-NH.35.92	Felis_silvestris	4.2655	1.23699	2.04744	1.62089	1.19434	0.76779	1.3223	2.21806	1.87682	1.10903	1.02372	0.469205	1.02372	1.19434	0.25593	3.8816	1.3223	0.639825	0.42655	0.298585	2.94319	1.66354	1.74885	1.66354	1.02372	0.469205	0.469205	1.91947	1.36496	0.469205	0.76779	0.895755	0.42655	0.59717	0.51186	0.458541
RCSOM-G16.24	Felis_silvestris	4.15887	1.35615	1.98902	1.58218	1.17533	0.813691	1.58218	2.16984	2.03423	1.17533	0.994512	0.406846	0.994512	1.13013	0.27123	3.84243	1.31095	0.587666	0.406846	0.248628	2.93833	1.763	1.85341	1.62738	0.904101	0.452051	0.542461	1.8082	1.35615	0.361641	0.904101	0.994512	0.452051	0.587666	0.542461	0.488215
RCSOM-A120.12	Felis_silvestris	4.05932	1.50514	1.91564	1.45953	1.18587	0.820987	1.59636	2.05247	2.05247	1.18587	1.00343	0.410494	0.957818	1.00343	0.273662	3.78566	1.23148	0.592935	0.410494	0.250857	2.82784	1.73319	1.82442	1.55075	0.912208	0.456104	0.456104	1.91564	1.41392	0.410494	0.912208	1.14026	0.456104	0.638545	0.592935	0.465226
RCSOM-A120.13	Felis_silvestris	4.12278	1.51449	1.76691	1.51449	1.22001	0.799314	1.34621	2.10346	1.97725	1.17794	1.05173	0.378623	0.967591	1.13587	0.252415	3.87036	1.34621	0.588968	0.378623	0.252415	2.94484	1.68277	1.80897	1.6407	0.967591	0.420692	0.462761	1.85104	1.38828	0.462761	0.967591	1.05173	0.462761	0.673107	0.588968	0.466968
RCSOM-G70.5	Felis_silvestris	4.10989	1.46782	1.80332	1.59363	1.25813	0.796814	1.38394	2.13882	2.01301	1.21619	1.09038	0.419376	0.964565	1.09038	0.209688	3.77438	1.25813	0.629064	0.419376	0.251626	2.97757	1.71944	1.88719	1.6775	0.922627	0.461314	0.503251	1.88719	1.38394	0.419376	0.922627	1.04844	0.419376	0.587126	0.587126	0.469701
BCMAG-Ab2797	Felis_silvestris	4.22342	1.4958	1.93574	1.53979	1.18784	0.703904	1.36381	2.15571	1.93574	1.18784	1.05586	0.43994	0.967868	1.14384	0.21997	3.87147	1.31982	0.65991	0.43994	0.246366	2.9476	1.67177	1.80375	1.71577	0.923874	0.43994	0.483934	1.93574	1.58378	0.351952	0.923874	1.05586	0.483934	0.571922	0.549925	0.472935
BMNH-1901.11.18.1	Leopardus_colocolo	4.45182	1.65931	2.1045	1.57837	1.2546	0.890363	1.2546	1.90214	1.90214	1.17366	1.09272	0.445182	0.890363	1.09272	0.161884	4.04711	1.49743	0.647537	0.404711	0.242826	3.23769	1.74026	1.86167	1.65931	0.971306	0.485653	0.485653	1.90214	1.37602	0.485653	0.809421	0.930835	0.445182	0.566595	0.526124	0.457323
BMNH-1901.12.27.1	Leopardus_colocolo	4.51459	1.79707	1.92856	1.53408	1.18344	0.832788	1.31493	1.75324	1.97239	1.18344	1.1396	0.482141	0.832788	1.05194	0.131493	4.16394	1.44642	0.657464	0.43831	0.175324	3.112	1.75324	1.8409	1.75324	0.92045	0.482141	0.482141	1.97239	1.49025	0.482141	0.832788	1.05194	0.482141	0.613633	0.569802	0.517205
BMNH-1927.11.1.67	Leopardus_colocolo	4.38128	1.76204	1.95253	1.4763	1.19057	0.809585	1.28581	2.0954	2.04777	1.14294	1.0477	0.476226	0.809585	1.00008	0.190491	4.0003	1.38106	0.666717	0.428604	0.166679	3.14309	1.76204	1.85728	1.61917	0.857207	0.476226	0.476226	1.95253	1.4763	0.476226	0.857207	1.0477	0.476226	0.619094	0.571472	0.542898
BMNH-1908.4.13.1	Leopardus_colocolo	4.49041	1.78785	2.03731	1.4968	1.28891	0.873135	1.20576	1.70469	1.95416	1.20576	1.1226	0.498934	0.789979	1.03945	0.124734	4.15778	1.4968	0.665246	0.415778	0.228678	3.24307	1.78785	1.91258	1.70469	0.95629	0.457356	0.498934	1.99574	1.45522	0.457356	0.831557	0.997868	0.457356	0.58209	0.540512	0.50725
BMNH-1921.6.7.3	Leopardus_colocolo	4.52611	1.68113	2.02597	1.4656	1.07764	0.905221	1.25007	2.02597	2.06908	1.07764	1.03454	0.474164	0.732798	0.991433	0.258635	4.09505	1.5087	0.560375	0.474164	0.129317	3.14672	1.63802	1.81044	1.72423	0.948327	0.431058	0.431058	1.89665	1.5087	0.431058	0.862115	1.16386	0.517269	0.646587	0.603481	0.579773
RCSOM-G16.3	Leopardus_geoffroyi	4.36703	1.69046	2.01917	1.45568	1.03306	0.798275	1.26785	1.92525	2.01917	1.03306	0.986104	0.469573	0.751318	0.939147	0.234787	4.08529	1.50264	0.563488	0.469573	0.281744	2.91136	1.64351	1.73742	1.69046	0.939147	0.422616	0.422616	1.87829	1.50264	0.375659	0.798275	1.17393	0.563488	0.751318	0.610446	0.516531
BMNH-1913.8.14.1	Leopardus_geoffroyi	4.52975	1.62606	1.89707	1.66478	1.04533	0.890463	1.08404	2.01322	1.7035	1.16147	1.12276	0.503305	0.967895	1.16147	0.232295	4.22002	1.4712	0.658169	0.46459	0.212937	3.05855	1.62606	1.81964	1.74221	0.967895	0.387158	0.387158	1.89707	1.4712	0.387158	0.890463	1.08404	0.46459	0.619453	0.503305	0.518792
BMNH-1917.1.25.2	Leopardus_geoffroyi	4.4687	1.50389	1.8906	1.67576	1.11718	0.730461	1.07421	1.71873	1.93357	1.16014	1.07421	0.472651	0.988271	1.20311	0.214841	4.08199	1.41795	0.601556	0.472651	0.171873	2.83591	1.63279	1.80467	1.7617	0.988271	0.429683	0.429683	1.8906	1.46092	0.429683	0.859366	1.16014	0.515619	0.644524	0.644524	0.556439
BMNH-1909.12.1.9	Leopardus_geoffroyi	4.44398	1.61242	1.96636	1.57309	1.06184	0.8652	1.10116	2.00569	1.80905	1.14049	1.06184	0.471927	0.825873	1.10116	0.235964	4.05071	1.49444	0.668564	0.471927	0.235964	2.94955	1.61242	1.76973	1.76973	0.943854	0.4326	0.4326	1.84838	1.41578	0.393273	0.8652	1.10116	0.511255	0.589909	0.550582	0.51912
BMNH-12.11.15.1	Leopardus_geoffroyi	4.42394	1.64814	1.95174	1.56139	1.04093	0.780696	1.17104	1.77825	1.95174	1.04093	0.997556	0.477092	0.910812	1.0843	0.21686	4.12034	1.47465	0.563836	0.477092	0.21686	2.86255	1.64814	1.73488	1.69151	0.910812	0.477092	0.477092	1.865	1.51802	0.43372	0.954184	1.0843	0.520464	0.65058	0.563836	0.520464
BMNH-1909.12.1.8	Leopardus_geoffroyi	4.48119	1.45336	1.97818	1.5341	1.09002	0.807421	1.00928	1.65521	1.89744	1.17076	1.04965	0.524824	0.807421	0.968905	0.282597	4.15822	1.5341	0.605566	0.484453	0.201855	2.86635	1.69558	1.8167	1.73596	0.928534	0.484453	0.444082	1.97818	1.5341	0.403711	0.928534	1.04965	0.524824	0.605566	0.565195	0.512712
BMNH-1921.4.8.1	Leopardus_geoffroyi	4.39952	1.56428	2.05311	1.51539	1.12432	0.782138	1.27097	1.75981	2.10199	1.12432	1.02656	0.488836	0.782138	1.02656	0.244418	4.10622	1.41762	0.635487	0.488836	0.195534	2.88413	1.66204	1.75981	1.66204	0.928788	0.459506	0.415511	1.85758	1.46651	0.391069	0.879905	1.17321	0.488836	0.68437	0.53772	0.586603
BMNH-1917.1.25.3	Leopardus_geoffroyi	4.33164	1.55374	1.9304	1.41249	1.08291	0.800412	1.27124	1.88332	2.02457	1.08291	0.988744	0.47083	0.706246	0.988744	0.258957	4.04914	1.41249	0.612079	0.47083	0.228353	2.91915	1.64791	1.74207	1.69499	0.941661	0.517913	0.447289	1.88332	1.45957	0.47083	0.894578	1.08291	0.47083	0.706246	0.564996	0.517913
BMNH-1837.5.13.94	Leopardus_geoffroyi	4.53799	1.60394	1.95603	1.68219	1.1345	0.782412	1.21274	1.79955	1.87779	1.1345	1.01714	0.469447	0.899774	1.09538	0.238636	4.22503	1.60394	0.586809	0.469447	0.187779	2.97317	1.68219	1.79955	1.68219	0.938894	0.469447	0.508568	1.76043	1.5257	0.430327	0.860653	1.05626	0.469447	0.586809	0.508568	0.514436
BMNH-1903.7.9.1	Leopardus_guigna	4.45637	1.75072	2.12208	1.3263	1.11409	0.848832	1.48546	1.85682	2.06903	1.06104	1.00799	0.477468	0.636624	0.848832	0.26526	4.13805	1.4324	0.636624	0.424416	0.26526	2.7587	1.64461	1.80377	1.64461	0.901884	0.424416	0.424416	1.80377	1.48546	0.318312	1.06104	1.11409	0.53052	0.742728	0.636624	0.490731
BCMAG-Ab2160	Leopardus_pardalis	4.53135	1.61583	1.82659	1.65096	1.10649	0.772789	0.878169	2.00223	1.79146	1.15918	1.12406	0.526901	0.913296	1.15918	0.210761	4.18008	1.47532	0.667409	0.491775	0.219542	2.95065	1.61583	1.75634	1.82659	1.08893	0.386394	0.421521	1.86172	1.51045	0.386394	0.878169	1.01868	0.526901	0.614718	0.562028	0.514607
BCMAG-Af1355	Leopardus_pardalis	4.51842	1.6804	1.90446	1.64306	1.15761	0.933558	1.08293	1.86712	1.79243	1.12027	1.08293	0.410766	0.821531	1.08293	0.242725	4.21968	1.45635	0.634819	0.522793	0.214718	3.09941	1.6804	1.90446	1.79243	1.00824	0.448108	0.448108	1.90446	1.34432	0.448108	0.821531	1.04559	0.410766	0.597477	0.48545	0.539597
BCMAG-Af1356	Leopardus_pardalis	4.63885	1.72757	1.91952	1.72757	1.05574	0.847789	1.02375	2.27143	1.66359	1.08773	1.11972	0.479881	0.927769	1.15171	0.191952	4.25494	1.2157	0.639841	0.543865	0.252737	3.10323	1.63159	1.79155	1.82355	1.05574	0.287928	0.415897	1.91952	1.53562	0.415897	0.831793	1.05574	0.511873	0.575857	0.575857	0.52147
BCMAG-Af1380	Leopardus_pardalis	4.45184	1.48934	1.84549	1.74836	1.10082	0.854753	0.922745	1.61885	1.65123	1.1332	1.10082	0.485655	0.938933	1.19795	0.291393	4.30614	1.48934	0.615163	0.485655	0.223401	2.94631	1.6836	1.81311	1.81311	1.00369	0.420901	0.453278	1.94262	1.48934	0.356147	0.874179	1.06844	0.453278	0.582786	0.550409	0.542315
BCMAG-Af1381	Leopardus_pardalis	4.51348	1.62618	1.92487	1.75893	1.16156	0.896059	1.12837	1.82531	1.79212	1.16156	1.12837	0.530998	0.995621	1.16156	0.199124	4.08205	1.39387	0.63056	0.530998	0.195805	2.95368	1.59299	1.72574	1.79212	0.995621	0.448029	0.431436	1.89168	1.42706	0.365061	0.763309	1.062	0.464623	0.580779	0.564185	0.514404
HM-NH.70.4B	Leopardus_pardalis	4.5831	1.51595	2.11528	1.72748	1.1634	0.775602	0.916621	1.5512	1.79799	1.1634	1.05764	0.52882	0.916621	1.09289	0.282037	4.23056	1.41019	0.564074	0.45831	0.190375	2.96139	1.72748	1.83324	1.79799	0.98713	0.423056	0.423056	1.93901	1.51595	0.387801	0.846112	1.09289	0.45831	0.669838	0.564074	0.581702
RCSOM-A127.12	Leopardus_pardalis	4.38839	1.4745	1.966	1.72025	1.19364	0.73725	1.12343	1.65004	1.82557	1.12343	1.05321	0.526607	1.01811	1.22875	0.280857	4.00222	1.36918	0.561714	0.456393	0.228197	2.91389	1.72025	1.82557	1.75536	0.947893	0.4915	0.526607	1.75536	1.36918	0.456393	0.73725	0.983	0.4915	0.561714	0.4915	0.51432
RCSOM-A127.2	Leopardus_pardalis	4.55293	1.56507	1.99191	1.60064	1.28051	0.889244	1.06709	1.77849	1.74292	1.31608	1.24494	0.426837	0.818104	1.06709	0.248988	4.2328	1.35165	0.604686	0.569116	0.124494	3.059	1.81406	1.95634	1.77849	1.10266	0.391267	0.462407	1.92077	1.49393	0.426837	0.782535	1.03152	0.497977	0.533546	0.497977	0.622471
RCSOM-G70.7	Leopardus_pardalis	4.3756	1.45853	1.85963	1.7867	1.13036	0.87512	1.13036	1.82317	1.75024	1.16683	1.16683	0.43756	1.02097	1.23975	0.255243	4.15682	1.45853	0.65634	0.54695	0.21878	3.20877	1.7867	1.93256	1.75024	1.02097	0.32817	0.364633	1.96902	1.495	0.43756	0.802193	1.02097	0.474023	0.54695	0.43756	0.508663
BMNH-1904.12.4.5	Leopardus_pardalis	4.76449	1.65044	2.08641	1.775	1.08992	0.809651	0.840792	1.775	1.775	1.18334	1.08992	0.498247	0.934213	1.21448	0.186843	4.32852	1.4636	0.622809	0.467107	0.186843	3.36317	1.74386	1.96185	1.775	1.12106	0.404826	0.404826	1.89957	1.4636	0.529387	0.809651	0.996494	0.467107	0.560528	0.498247	0.53873
BMNH-1926.12.4.28	Leopardus_pardalis	4.72011	1.8376	2.05379	1.69347	1.08094	0.79269	1.04491	1.7295	1.76554	1.11697	1.08094	0.432376	0.900784	1.11697	0.216188	4.28773	1.44125	0.576502	0.504439	0.180157	2.88251	1.69347	1.8376	1.80157	1.08094	0.432376	0.432376	1.90966	1.51332	0.432376	0.936815	1.08094	0.504439	0.576502	0.504439	0.544073
BMNH-1914.4.25.48	Leopardus_pardalis	4.84122	1.40947	2.42061	1.77716	1.10306	0.857937	0.827296	1.74651	1.65459	1.16434	1.16434	0.428969	0.949859	1.19498	0.214484	4.35097	1.56267	0.674093	0.49025	0.199164	3.2479	1.68523	1.83844	1.86908	1.16434	0.367687	0.398328	1.89972	1.37883	0.49025	0.827296	1.01114	0.459609	0.551531	0.52089	0.522422
BMNH-1899.8.1.28	Leopardus_pardalis	4.37569	1.58795	1.76439	1.58795	1.09392	0.846909	1.19979	1.69382	1.79968	1.12921	1.09392	0.458742	0.882196	1.05864	0.317591	4.19926	1.4468	0.599894	0.49403	0.141151	2.82303	1.65853	1.76439	1.72911	1.02335	0.423454	0.458742	1.90554	1.48209	0.458742	0.882196	1.09392	0.529318	0.599894	0.564606	0.557548
BMNH-1933.6.12.1	Leopardus_pardalis	4.62964	1.61571	1.98857	1.77107	1.21179	0.932143	0.901072	1.89536	1.64679	1.305	1.305	0.528214	0.838929	1.0875	0.310714	4.28786	1.39821	0.621429	0.559286	0.186429	3.13821	1.64679	1.86429	1.92643	1.14964	0.341786	0.372857	1.80214	1.36714	0.435	0.838929	0.932143	0.435	0.497143	0.466071	0.525107
BMNH-1915.2.15.1	Leopardus_pardalis	4.61094	1.53698	2.18037	1.7157	1.07231	0.822105	1.10806	1.93016	1.75144	1.10806	1.10806	0.500412	1.00082	1.21529	0.250206	4.21776	1.46549	0.643387	0.500412	0.214462	3.07396	1.78719	1.93016	1.75144	0.96508	0.393181	0.393181	1.93016	1.53698	0.393181	0.822105	1.00082	0.464668	0.500412	0.428925	0.53973
MS-Ocelot	Leopardus_pardalis	4.60444	1.55789	1.86947	1.73099	1.17707	0.830876	0.900116	1.97333	1.73099	1.14245	1.17707	0.519298	0.969356	1.24631	0.242339	4.189	1.38479	0.657777	0.519298	0.250994	3.15041	1.69637	1.73099	1.66175	1.07322	0.311579	0.311579	1.97333	1.48865	0.553917	0.830876	0.969356	0.484678	0.553917	0.484678	0.515836
HM-NH.35.87	Leopardus_tigrinus	4.37043	1.72896	2.01712	1.48883	1.10461	0.768428	1.48883	2.06515	2.1612	1.05659	1.00856	0.480267	0.816454	1.05659	0.21612	4.05826	1.41679	0.576321	0.465859	0.244936	2.81437	1.63291	1.68094	1.58488	0.912508	0.384214	0.408227	1.92107	1.4408	0.384214	0.912508	1.15264	0.480267	0.720401	0.624347	0.511485
BMNH-1903.7.1.11	Leopardus_tigrinus	4.41715	1.72036	2.04584	1.44139	1.06942	0.743941	1.2089	1.85985	1.95285	1.02292	0.976423	0.464963	0.836934	1.02292	0.232482	4.18467	1.53438	0.604452	0.464963	0.232482	2.78978	1.53438	1.62737	1.72036	0.929927	0.464963	0.464963	1.72036	1.44139	0.418467	0.929927	1.16241	0.557956	0.697445	0.650949	0.481237
BMNH-63.1211	Leopardus_tigrinus	4.48717	1.65045	2.01149	1.49572	1.03153	0.722074	1.34099	2.01149	2.06307	0.979958	0.928381	0.515767	0.876804	1.03153	0.257884	4.22929	1.5473	0.618921	0.46419	0.257884	3.04303	1.59888	1.75361	1.65045	0.876804	0.46419	0.361037	1.80519	1.39257	0.412614	0.876804	1.13469	0.567344	0.618921	0.567344	0.479663
BMNH-1884.2.8.3	Leopardus_tigrinus	4.46375	1.81664	1.92045	1.40141	1.03808	0.726657	1.45331	1.81664	2.17997	1.03808	0.986177	0.519041	0.778561	0.934273	0.207616	4.20423	1.55712	0.622849	0.519041	0.19464	2.80282	1.66093	1.76474	1.60903	0.882369	0.467137	0.415233	1.86855	1.45331	0.363329	0.934273	1.14189	0.519041	0.726657	0.674753	0.526826
BMNH-29.6.6.1	Leopardus_tigrinus	4.34994	1.56402	2.05278	1.51515	1.07527	0.782011	1.36852	1.75953	2.05278	1.07527	0.977514	0.537633	0.830887	1.02639	0.244378	4.00781	1.36852	0.586508	0.488757	0.207722	2.68816	1.6129	1.75953	1.6129	0.879763	0.488757	0.488757	1.8084	1.36852	0.488757	0.977514	1.07527	0.488757	0.635384	0.586508	0.493645
BMNH-1898.7.1.2	Leopardus_tigrinus	4.4175	1.767	1.96334	1.4725	1.03075	0.785334	1.42342	1.96334	1.91425	1.03075	0.932584	0.490834	0.785334	0.981668	0.245417	4.123	1.4725	0.589001	0.44175	0.2945	2.74867	1.4725	1.61975	1.66883	0.883501	0.44175	0.44175	1.66883	1.32525	0.490834	1.03075	1.12892	0.539917	0.687167	0.638084	0.436842
BMNH-98.3.2.16	Leopardus_wiedii	4.38104	1.82543	1.9167	1.50598	1.09526	0.775809	1.41471	2.28179	1.96234	1.04962	1.00399	0.456358	0.775809	0.958352	0.273815	4.10722	1.41471	0.638901	0.456358	0.228179	3.0576	1.50598	1.68852	1.64289	0.912716	0.456358	0.456358	1.96234	1.46035	0.410722	0.86708	1.04962	0.501994	0.638901	0.54763	0.465485
BMNH-1855.12.26.175	Leopardus_wiedii	4.3942	1.74823	1.93723	1.46473	1.08674	0.755991	1.41748	2.17347	2.03172	1.03949	0.992238	0.519744	0.755991	0.944988	0.236247	4.06345	1.46473	0.614242	0.472494	0.283496	2.92946	1.55923	1.65373	1.60648	0.897739	0.425245	0.425245	1.98448	1.55923	0.472494	0.80324	1.08674	0.472494	0.614242	0.566993	0.486669
BMNH-1858.5.4.71	Leopardus_wiedii	4.5537	1.85866	2.04452	1.57986	1.20813	0.789928	1.53339	2.32332	1.99805	1.11519	1.06873	0.464664	0.882861	1.11519	0.139399	4.18197	1.44046	0.604063	0.464664	0.185866	3.06678	1.67279	1.81219	1.62632	0.882861	0.464664	0.418197	1.99805	1.57986	0.464664	0.836395	1.02226	0.418197	0.604063	0.51113	0.536687
BMNH-1914.5.28.9	Leopardus_wiedii	4.42174	1.80304	1.80304	1.50253	1.11617	0.85859	1.33082	2.01769	2.01769	1.07324	1.03031	0.515154	0.729802	0.94445	0.257577	4.25002	1.4596	0.601013	0.515154	0.214648	2.79042	1.58839	1.76011	1.67425	0.94445	0.386366	0.429295	1.84597	1.4596	0.429295	0.94445	1.07324	0.429295	0.643943	0.601013	0.536619
BMNH-1908.6.17.9	Leopardus_wiedii	4.48593	1.86544	1.99868	1.55453	1.15479	0.888303	1.55453	2.354	1.99868	1.11038	1.02155	0.444152	0.799473	1.02155	0.222076	4.21944	1.4657	0.621812	0.488567	0.222076	2.9314	1.59895	1.73219	1.68778	1.02155	0.399737	0.399737	1.82102	1.51012	0.310906	0.755058	1.02155	0.488567	0.621812	0.577397	0.519657
BMNH-26.1.12.5	Leopardus_wiedii	4.32618	1.72164	1.85408	1.54506	1.05947	0.794605	1.54506	2.29552	1.94237	1.05947	1.01533	0.529736	0.75046	0.971183	0.264868	4.10546	1.41263	0.618026	0.485592	0.220724	3.04598	1.58921	1.72164	1.6775	0.971183	0.441447	0.397302	1.89822	1.41263	0.485592	0.927039	1.01533	0.397302	0.662171	0.529736	0.470141
BMNH-1922.5.29.3	Leopardus_wiedii	4.31009	1.86771	1.9156	1.38881	1.14936	0.766239	1.4367	2.01138	2.10716	1.10147	1.05358	0.478899	0.718349	0.862019	0.23945	4.07064	1.4367	0.622569	0.478899	0.23945	2.82551	1.62826	1.72404	1.53248	0.862019	0.478899	0.431009	1.9156	1.38881	0.478899	0.957798	1.05358	0.478899	0.670459	0.574679	0.493266
BMNH-1913.12.18.2	Leopardus_wiedii	4.41368	1.66106	1.99327	1.51869	1.13901	0.759343	1.6136	2.27803	2.08819	1.09155	1.0441	0.474589	0.806801	0.949178	0.189836	4.12892	1.47123	0.616966	0.474589	0.237295	2.98991	1.56614	1.66106	1.70852	0.949178	0.42713	0.42713	1.94582	1.51869	0.379671	0.759343	1.09155	0.474589	0.664425	0.616966	0.4912
HM-NH.36.18	Leptailurus_serval	4.40428	1.45653	1.83801	1.62993	1.1791	0.797625	1.14442	1.80333	1.66461	1.14442	1.10974	0.450832	1.04038	1.14442	0.346794	4.09217	1.38717	0.658908	0.450832	0.260095	2.94775	1.66461	1.83801	1.73397	0.901663	0.52019	0.55487	1.76865	1.3525	0.416152	0.797625	0.936343	0.450832	0.52019	0.450832	0.485511
RCSOM-A124.3	Leptailurus_serval	4.46149	1.52257	1.98288	1.69961	1.20389	0.814399	1.13308	1.77043	1.94748	1.16849	1.06226	0.495721	0.991442	1.16849	0.389495	4.03658	1.34553	0.601947	0.424904	0.212452	2.83269	1.66421	1.73502	1.73502	0.956033	0.424904	0.53113	1.69961	1.38094	0.354086	0.743581	0.991442	0.495721	0.566538	0.495721	0.5329
RCSOM-A124.12	Leptailurus_serval	4.32018	1.5675	1.94981	1.52927	1.07049	0.841096	1.29988	2.06451	1.87335	1.07049	1.03225	0.497012	0.879328	1.03225	0.305853	4.05256	1.37634	0.611706	0.497012	0.191158	3.0203	1.5675	1.79689	1.68219	0.91756	0.420548	0.45878	1.91158	1.52927	0.45878	0.841096	1.07049	0.45878	0.611706	0.535243	0.481719
RCSOM-A124.11	Leptailurus_serval	4.37492	1.41237	1.9291	1.68796	1.20569	0.809532	1.17124	1.75686	1.82575	1.13679	1.06789	0.482274	1.03344	1.20569	0.37893	3.96154	1.30903	0.585619	0.447826	0.275585	2.7903	1.68796	1.7913	1.68796	0.9301	0.482274	0.551171	1.68796	1.41237	0.37893	0.792308	0.964548	0.447826	0.516722	0.482274	0.482274
RCSOM-A124.1	Leptailurus_serval	4.44052	1.46824	1.96959	1.6831	1.21756	0.752024	1.07432	1.71891	1.75472	1.11013	1.03851	0.501349	1.07432	1.25337	0.322296	4.15404	1.43243	0.572971	0.429728	0.250675	2.93647	1.6831	1.79053	1.75472	0.966888	0.501349	0.53716	1.6831	1.43243	0.393917	0.716213	0.966888	0.429728	0.572971	0.501349	0.515673
BMNH-99.10.23.3	Leptailurus_serval	4.35843	1.47569	1.99047	1.61296	1.20114	0.823641	1.23546	1.81887	1.81887	1.13251	1.02955	0.480457	0.995233	1.13251	0.343184	3.98093	1.3041	0.617731	0.41182	0.240229	2.9857	1.64728	1.78456	1.71592	0.960914	0.480457	0.514776	1.78456	1.51001	0.377502	0.823641	0.960914	0.446139	0.514776	0.514776	0.511344
BMNH-50.2042	Leptailurus_serval	4.30649	1.50552	1.96068	1.57554	1.1554	0.805278	0.945326	1.99569	1.7506	1.12039	1.08537	0.525181	0.945326	1.12039	0.385133	3.95637	1.33046	0.630218	0.420145	0.245085	3.01104	1.64557	1.82063	1.68058	0.945326	0.490169	0.525181	1.7506	1.4355	0.420145	0.84029	1.01535	0.455157	0.525181	0.525181	0.437651
BMNH-9.11.2.4	Leptailurus_serval	4.25093	1.36637	1.89774	1.70796	1.21455	0.759095	1.25251	1.78387	1.78387	1.1766	1.02478	0.569322	1.02478	1.13864	0.303638	3.98525	1.36637	0.607276	0.455457	0.189774	2.80865	1.63206	1.78387	1.67001	0.87296	0.531367	0.569322	1.74592	1.44228	0.417502	0.759095	0.986824	0.455457	0.569322	0.531367	0.531367
BMNH-9.11.2.5	Leptailurus_serval	4.2825	1.45299	1.91183	1.68241	1.1471	0.764732	1.18533	1.64417	1.87359	1.1471	1.03239	0.497075	1.03239	1.22357	0.305893	3.9766	1.37652	0.573549	0.458839	0.229419	2.67656	1.64417	1.75888	1.68241	0.879441	0.497075	0.497075	1.75888	1.49123	0.420602	0.802968	1.07062	0.535312	0.573549	0.497075	0.506635
BMNH-11.1.12.1	Leptailurus_serval	4.26665	1.45964	1.94619	1.60935	1.19766	0.823389	1.30994	1.94619	1.83391	1.08538	1.01052	0.486548	0.973096	1.1228	0.374268	3.92981	1.27251	0.598828	0.411694	0.224561	3.14385	1.72163	1.90877	1.64678	0.898243	0.449121	0.486548	1.79649	1.30994	0.486548	0.823389	1.01052	0.449121	0.561402	0.486548	0.471577
BMNH-1937.2.24.27	Leptailurus_serval	4.31069	1.47111	1.91586	1.64217	1.1632	0.821083	1.23162	1.84744	1.84744	1.09478	1.06057	0.513177	0.992142	1.19741	0.307906	3.96857	1.36847	0.581601	0.410542	0.273694	3.04485	1.60795	1.7448	1.67638	0.95793	0.478965	0.513177	1.71059	1.4369	0.410542	0.786871	0.992142	0.478965	0.547389	0.513177	0.451596
BMNH-66.36	Leptailurus_serval	4.19677	1.44595	1.79862	1.65755	1.16381	0.775874	1.16381	1.79862	1.79862	1.12854	1.05801	0.529005	0.987476	1.19908	0.317403	3.91464	1.26961	0.634806	0.423204	0.229235	2.92716	1.65755	1.79862	1.69282	0.881675	0.493738	0.529005	1.79862	1.48121	0.458471	0.811141	1.02274	0.529005	0.564272	0.458471	0.474341
BMNH-70.679	Leptailurus_serval	4.41523	1.43495	1.98685	1.58212	1.1406	0.846252	1.28777	1.87647	1.87647	1.10381	0.993426	0.478316	0.956632	1.17739	0.331142	4.04729	1.43495	0.588697	0.404729	0.220761	2.94348	1.65571	1.76609	1.58212	0.883045	0.51511	0.551903	1.76609	1.43495	0.367936	0.809458	0.993426	0.51511	0.551903	0.51511	0.51143
RCSOM-A122.2	Lynx_canadensis	4.17706	1.54584	1.74318	1.6774	1.21694	0.920926	1.31561	1.84185	1.87474	1.11827	1.08538	0.559134	0.920926	1.18405	0.361792	3.78237	1.21694	0.624914	0.394682	0.230231	2.86145	1.74318	1.80896	1.64451	0.986706	0.460463	0.460463	1.71029	1.41428	0.460463	0.855145	0.986706	0.394682	0.526243	0.460463	0.532821
RCSOM-A122.3	Lynx_canadensis	4.06561	1.58956	1.55899	1.62013	1.22274	0.947624	1.22274	1.83411	1.83411	1.13104	1.0699	0.550233	0.917055	1.1616	0.427959	3.72936	1.1616	0.641939	0.397391	0.21398	2.8123	1.68127	1.74241	1.62013	0.947624	0.458528	0.550233	1.71184	1.37558	0.458528	0.855918	0.978192	0.458528	0.519665	0.519665	0.501324
RCSOM-G16.32	Lynx_canadensis	4.12707	1.62026	1.6814	1.58968	1.25341	1.00884	1.19226	1.92596	1.74254	1.19226	1.10055	0.580846	0.886555	1.10055	0.427992	3.79079	1.22283	0.672559	0.397421	0.244567	3.05709	1.6814	1.77311	1.62026	0.978267	0.397421	0.458563	1.71197	1.31455	0.489134	0.886555	0.947697	0.397421	0.489134	0.489134	0.495248
BMNH-62.12.12.29	Lynx_canadensis	4.06076	1.41961	1.81578	1.6177	1.18851	0.858371	1.25454	1.74976	1.8488	1.1555	1.08947	0.561243	0.9244	1.1555	0.363157	3.76363	1.22153	0.660285	0.429185	0.198086	2.87224	1.71674	1.78277	1.58468	0.957414	0.429185	0.4622	1.71674	1.35359	0.495214	0.891385	1.02344	0.4622	0.561243	0.528228	0.529879
BMNH-1989.377	Lynx_canadensis	4.11134	1.65729	1.65729	1.56167	1.21109	0.924255	1.27483	1.91225	1.84851	1.14735	1.08361	0.509934	0.860514	1.08361	0.35058	3.76076	1.24296	0.637417	0.414321	0.191225	2.93212	1.7529	1.84851	1.59354	0.987997	0.446192	0.541805	1.7529	1.40232	0.478063	0.892384	0.987997	0.446192	0.541805	0.478063	0.53065
BMNH-63.2.24.40	Lynx_canadensis	4.04236	1.53547	1.62948	1.56681	1.22211	0.940085	1.34745	1.94284	1.84883	1.15944	1.09677	0.564051	0.846076	1.00276	0.438706	3.69767	1.19077	0.658059	0.40737	0.172349	2.88293	1.75482	1.84883	1.59814	0.971421	0.438706	0.501379	1.75482	1.41013	0.470042	0.877412	1.00276	0.470042	0.532715	0.501379	0.509213
BMNH-85.804	Lynx_canadensis	4.07223	1.46346	1.68616	1.59071	1.24076	0.922614	1.24076	1.90886	1.81341	1.14531	1.08169	0.509028	0.890799	1.14531	0.349957	3.75408	1.24076	0.636285	0.413585	0.190886	3.02236	1.71797	1.81341	1.5589	0.922614	0.509028	0.540843	1.7816	1.39983	0.477214	0.890799	0.986242	0.477214	0.509028	0.509028	0.501075
BCMAG-Ab4458	Lynx_canadensis	4.17163	1.73283	1.63656	1.5082	1.2194	0.962684	1.09104	1.8291	1.8291	1.12313	1.12313	0.57761	0.866415	1.09104	0.417163	3.81865	1.41194	0.673879	0.481342	0.174888	2.98432	1.76492	1.8291	1.57238	0.994773	0.449252	0.481342	1.79701	1.34776	0.481342	0.850371	0.962684	0.417163	0.513431	0.449252	0.497387
RCSOM-A122.1	Lynx_lynx	4.16967	1.39941	1.71356	1.71356	1.19949	0.971019	1.17094	2.08484	1.62789	1.14238	1.08526	0.542628	1.02814	1.25661	0.342713	3.71272	1.14238	0.656866	0.48551	0.199916	2.8845	1.62789	1.77068	1.65644	1.02814	0.428391	0.48551	1.85636	1.45653	0.514069	0.828222	0.94246	0.428391	0.48551	0.45695	0.515497
RCSOM-A122.11	Lynx_lynx	4.06966	1.50728	1.65801	1.65801	1.26612	0.904369	1.29626	1.80874	1.74845	1.26612	1.14553	0.512476	0.96466	1.20583	0.422039	3.73806	1.20583	0.633058	0.512476	0.120583	2.92413	1.86903	1.92932	1.62786	0.994806	0.422039	0.512476	1.80874	1.3867	0.452184	0.874223	0.934514	0.452184	0.48233	0.452184	0.581811
BMNH-83.4.21.1	Lynx_lynx	4.07711	1.41687	1.64819	1.73494	1.24337	0.925301	1.18554	1.87952	1.76386	1.18554	1.0988	0.520482	0.954217	1.18554	0.433735	3.67229	1.18554	0.607229	0.462651	0.173494	2.9494	1.73494	1.8506	1.61928	1.04096	0.433735	0.491566	1.82169	1.35904	0.491566	0.925301	0.925301	0.433735	0.491566	0.462651	0.542169
BMNH-85.803	Lynx_lynx	3.98502	1.36074	1.84671	1.65232	1.19874	0.809962	1.23114	1.84671	1.81432	1.19874	1.10155	0.518376	0.939556	1.16635	0.388782	3.59623	1.10155	0.550774	0.550774	0.0971955	2.78627	1.81432	1.87911	1.61992	1.00435	0.485977	0.518376	1.87911	1.49033	0.550774	0.939556	1.03675	0.453579	0.518376	0.550774	0.584793
BMNH-1230c	Lynx_lynx	4.12275	1.37425	1.65471	1.68276	1.23402	0.953562	1.17793	1.99126	1.73885	1.20598	1.12184	0.504827	0.953562	1.20598	0.448735	3.67402	1.20598	0.645057	0.476781	0.168276	3.02896	1.7108	1.79494	1.62666	1.0377	0.448735	0.448735	1.79494	1.37425	0.532873	0.925516	0.925516	0.420689	0.476781	0.420689	0.544091
BMNH-55.12.26.176	Lynx_lynx	4.22539	1.49297	1.69016	1.7465	1.23945	0.845078	1.0986	1.85917	1.63382	1.18311	1.15494	0.535216	0.957756	1.26762	0.450708	3.83102	1.23945	0.619724	0.450708	0.1831	2.90144	1.77466	1.831	1.66199	1.04226	0.478878	0.563386	1.80283	1.40846	0.450708	0.845078	0.873248	0.39437	0.478878	0.422539	0.532399
BMNH-69.10.19.16	Lynx_lynx	4.12626	1.51103	1.71443	1.68537	1.22044	0.871746	1.10421	1.91784	1.68537	1.19139	1.10421	0.63928	0.929862	1.22044	0.435873	3.66133	1.19139	0.610222	0.464931	0.188878	2.87676	1.71443	1.77255	1.62726	1.01704	0.406815	0.493989	1.80161	1.42385	0.493989	0.842687	0.929862	0.464931	0.493989	0.435873	0.520142
BMNH-58.5.4.63	Lynx_lynx	4.21036	1.43331	1.70206	1.6722	1.25415	0.8361	1.04512	1.6722	1.70206	1.22429	1.13471	0.537493	0.955542	1.16457	0.41805	3.82217	1.16457	0.627075	0.507632	0.179164	2.86663	1.73192	1.8215	1.6722	1.01526	0.507632	0.507632	1.85136	1.5229	0.477771	0.8361	0.925682	0.41805	0.507632	0.477771	0.506139
BMNH-42.41	Lynx_lynx	4.07843	1.45259	1.67607	1.6202	1.22912	0.893902	1.14531	2.01128	1.67607	1.17325	1.11738	0.50282	0.921837	1.17325	0.474886	3.74322	1.20118	0.670427	0.474886	0.237443	2.98899	1.73194	1.84367	1.6202	1.00564	0.446951	0.530754	1.81574	1.39672	0.446951	0.838033	0.921837	0.446951	0.474886	0.391082	0.474886
BMNH-95.9.4.1	Lynx_pardinus	4.09	1.51826	1.61121	1.6422	1.20841	0.960529	1.30136	1.95204	1.76613	1.11545	1.08447	0.588712	0.960529	1.23939	0.402803	3.71818	1.23939	0.588712	0.433787	0.185909	2.8506	1.61121	1.67318	1.67318	1.05348	0.495757	0.526742	1.76613	1.39432	0.464772	0.83659	0.929544	0.433787	0.526742	0.464772	0.467871
BMNH-4.12.12.1	Lynx_pardinus	4.13706	1.52098	1.52098	1.64266	1.15594	0.943007	1.2472	2.03811	1.76434	1.09511	1.06469	0.547553	0.943007	1.15594	0.395455	3.77203	1.2472	0.638811	0.425874	0.197727	2.98112	1.64266	1.73392	1.67308	1.03427	0.486713	0.517133	1.82518	1.42972	0.425874	0.851748	0.943007	0.456294	0.547553	0.486713	0.46542
BMNH-39.3664	Lynx_pardinus	4.02847	1.50658	1.67034	1.60484	1.17906	0.949801	1.40833	1.99786	1.86685	1.11356	1.0153	0.55678	0.982553	1.17906	0.393021	3.53719	1.14631	0.589532	0.425773	0.212886	2.94766	1.63759	1.67034	1.60484	0.982553	0.491276	0.524028	1.80135	1.44108	0.491276	0.851546	0.949801	0.425773	0.55678	0.458525	0.458525
BMNH-1903.3.16.1	Lynx_pardinus	4.21042	1.54483	1.66599	1.75687	1.15105	0.969305	1.21163	1.72657	1.72657	1.12076	1.06018	0.605816	0.908723	1.18134	0.424071	3.75606	1.21163	0.605816	0.454362	0.181745	2.93821	1.60541	1.72657	1.6357	1.02989	0.484652	0.545234	1.84774	1.39338	0.484652	0.848142	0.939014	0.454362	0.484652	0.484652	0.454362
BMNH-19.4.2.1	Lynx_rufus	4.34962	1.65545	1.78529	1.65545	1.16855	0.779036	1.16855	1.98005	1.72037	1.16855	1.10363	0.519357	0.941335	1.10363	0.292138	4.05748	1.29839	0.649196	0.421978	0.210989	3.05122	1.88267	1.85021	1.78529	1.07117	0.454437	0.519357	1.88267	1.46069	0.357058	0.811495	1.00625	0.421978	0.551817	0.486897	0.480405
BMNH-1227.a	Lynx_rufus	4.40504	1.78386	1.74745	1.60183	1.16497	0.76451	1.31059	1.96588	1.85667	1.16497	1.09216	0.509674	0.873726	1.09216	0.327647	4.04098	1.34699	0.655295	0.400458	0.182026	2.87602	1.67464	1.78386	1.74745	1.01935	0.436863	0.473268	1.78386	1.45621	0.400458	0.873726	1.01935	0.473268	0.582484	0.509674	0.491471
BMNH-43.5.27.5	Lynx_rufus	4.2477	1.66368	1.80527	1.59289	1.13272	0.814143	1.4513	2.05306	1.80527	1.16812	1.09732	0.530963	0.884938	1.09732	0.28318	3.89373	1.27431	0.672553	0.460168	0.212385	2.8318	1.66368	1.73448	1.69908	1.02653	0.460168	0.495565	1.76988	1.4159	0.42477	0.849541	0.991131	0.42477	0.601758	0.460168	0.474327
BMNH-94.5.9.2	Lynx_rufus	4.23546	1.61843	1.85947	1.58399	1.13634	0.791997	1.44625	2.10051	1.92834	1.13634	1.03304	0.482085	0.826431	1.03304	0.309912	3.85668	1.23965	0.619823	0.413216	0.223825	2.99581	1.72173	1.82504	1.72173	1.03304	0.44765	0.482085	1.85947	1.48069	0.482085	0.791997	0.96417	0.44765	0.550954	0.51652	0.490694
BMNH-82.10.26.10	Lynx_rufus	4.24898	1.52444	1.88123	1.55688	1.13522	0.843309	1.26496	1.9461	1.68662	1.16766	1.07035	0.551394	0.875744	1.07035	0.38922	3.8922	1.26496	0.648699	0.421655	0.25948	2.98402	1.62175	1.78392	1.65418	1.00548	0.421655	0.518959	1.78392	1.3947	0.421655	0.875744	0.973049	0.45409	0.551394	0.486525	0.441116
BMNH-88.11.25.1	Lynx_rufus	4.22632	1.6509	1.94807	1.55185	1.18865	0.825452	1.35374	2.04712	1.81599	1.15563	1.05658	0.561307	0.85847	1.0896	0.363199	3.79708	1.25469	0.627344	0.429235	0.198109	2.90559	1.55185	1.6509	1.6509	0.957525	0.429235	0.462253	1.88203	1.51883	0.462253	0.85847	1.02356	0.429235	0.594326	0.528289	0.444093
BMNH-57.6.22.6	Lynx_rufus	4.17542	1.61629	1.81833	1.58262	1.17855	0.774473	1.27956	2.02037	1.81833	1.14487	1.07753	0.51654	0.909164	1.07753	0.269382	3.73768	1.24589	0.639782	0.404073	0.168364	2.89586	1.64997	1.78466	1.64997	1.01018	0.471419	0.505091	1.95302	1.4816	0.505091	0.909164	1.04386	0.505091	0.572437	0.538764	0.48152
BMNH-13.8.2.1	Lynx_rufus	4.1166	1.54372	1.83777	1.54372	1.17617	0.845373	1.43346	2.09505	1.87452	1.13942	0.955639	0.47782	0.882128	1.06591	0.294043	3.74905	1.21293	0.624841	0.441064	0.257287	2.97718	1.61724	1.7275	1.61724	0.955639	0.47782	0.47782	1.80101	1.43346	0.514575	0.882128	0.955639	0.441064	0.588086	0.514575	0.487008
BMNH-1938.11.30.22	Neofelis_diardi	4.55679	1.52955	1.88008	1.81634	1.14716	0.828508	0.924105	1.59328	1.68888	1.08343	1.05157	0.509851	1.08343	1.27463	0.382388	4.20627	1.33836	0.541717	0.44612	0.33459	3.05911	1.68888	1.81634	1.91194	1.08343	0.382388	0.382388	1.81634	1.40209	0.350523	0.796642	0.95597	0.44612	0.541717	0.477985	0.570396
BMNH-1938.11.30.24	Neofelis_diardi	4.73798	1.40054	2.1455	1.99651	1.10255	0.774764	0.834362	1.16215	1.63892	1.16215	1.16215	0.566174	1.07275	1.37074	0.387382	4.291	1.34094	0.566174	0.476778	0.22349	3.06926	1.69852	1.78792	1.99651	1.16215	0.417181	0.387382	1.93691	1.51973	0.357584	0.86416	0.983355	0.446979	0.506577	0.536375	0.451449
BMNH-1903.4.9.2	Neofelis_diardi	4.62962	1.42694	2.02942	1.83916	1.10984	0.824452	0.951291	1.42694	1.68061	1.07813	1.07813	0.475645	1.04642	1.23668	0.412226	4.21739	1.3001	0.539065	0.475645	0.285387	3.01242	1.68061	1.77574	1.87087	1.10984	0.380516	0.412226	1.80745	1.42694	0.380516	0.856162	0.919581	0.443936	0.539065	0.507355	0.597728
BMNH-30.3.3.5	Neofelis_diardi	4.56242	1.41371	1.99204	1.83139	1.15667	0.867503	0.931762	1.5101	1.70288	1.09241	1.12454	0.481946	0.996022	1.22093	0.417686	4.14473	1.38158	0.546205	0.481946	0.289168	3.18084	1.73501	1.79926	1.83139	1.15667	0.353427	0.353427	1.89565	1.44584	0.385557	0.835373	0.899632	0.417686	0.546205	0.514076	0.551025
BMNH-1938.11.30.23	Neofelis_diardi	4.94029	1.29327	2.19856	2.06923	1.16394	0.827693	0.827693	1.44846	1.47433	1.03462	1.08635	0.569039	1.13808	1.31914	0.439712	4.37125	1.44846	0.543173	0.491443	0.349183	3.23317	1.68125	1.81058	1.96577	1.16394	0.387981	0.33625	1.9399	1.39673	0.33625	0.827693	0.905289	0.413846	0.465577	0.439712	0.477217
BMNH-39.336	Neofelis_diardi	4.46779	1.40416	1.85094	1.78712	1.14886	0.829732	0.957383	1.30842	1.7552	1.05312	1.05312	0.478692	1.02121	1.27651	0.414866	4.14866	1.34034	0.542517	0.478692	0.271259	3.03171	1.72329	1.85094	1.85094	1.11695	0.414866	0.382953	1.88285	1.4999	0.351041	0.829732	1.02121	0.478692	0.57443	0.510604	0.545708
BMNH-55.1644	Neofelis_nebulosa	4.71455	1.44618	2.02465	1.82219	1.0991	0.809861	0.809861	1.27264	1.64865	1.18587	1.12802	0.462778	0.983403	1.24372	0.404931	4.36746	1.33049	0.607396	0.462778	0.303698	3.0659	1.67757	1.73542	2.02465	1.12802	0.376007	0.376007	1.79326	1.44618	0.376007	0.867708	1.01233	0.433854	0.549549	0.520625	0.56401
BMNH-43.65	Neofelis_nebulosa	4.78678	1.5671	1.99449	1.76655	1.13971	0.82629	0.797797	1.1967	1.53861	1.1967	1.1967	0.51287	0.940261	1.13971	0.455884	4.38788	1.31067	0.626841	0.51287	0.299174	2.90626	1.65258	1.82354	2.02299	1.13971	0.398899	0.341913	1.90901	1.36765	0.341913	0.883275	0.968754	0.455884	0.51287	0.484377	0.578403
BMNH-47.685	Neofelis_nebulosa	4.69635	1.48159	1.92886	1.95681	1.11818	0.726815	0.726815	1.00636	1.62136	1.23	1.20204	0.559089	1.09022	1.31386	0.363408	4.33294	1.42568	0.642952	0.50318	0.307499	2.90726	1.64931	1.78908	1.95681	1.17409	0.363408	0.335453	1.84499	1.48159	0.307499	0.922497	1.00636	0.475225	0.559089	0.531134	0.56468
BMNH-58.6.24.49	Neofelis_nebulosa	4.87515	1.35421	2.27507	1.89589	1.13754	0.812526	0.785441	1.40838	1.57088	1.1917	1.1917	0.5146	1.0292	1.24587	0.379179	4.38764	1.43546	0.622936	0.460431	0.270842	3.2501	1.7063	1.81464	1.97715	1.1917	0.352094	0.379179	1.78756	1.32713	0.352094	0.812526	0.947947	0.460431	0.5146	0.460431	0.56606
BMNH-30.3.3.4	Neofelis_nebulosa	4.75545	1.54476	2.05968	1.81737	1.151	0.817816	0.817816	1.27216	1.66592	1.151	1.151	0.514921	0.999553	1.18129	0.454342	4.21024	1.30245	0.5755	0.454342	0.272605	3.05924	1.7265	1.84766	1.90824	1.151	0.333184	0.424053	1.78708	1.36303	0.363474	0.848105	1.02984	0.454342	0.545211	0.484632	0.554297
BMNH-1977.17	Neofelis_nebulosa	4.71616	1.61342	1.83061	1.9237	1.08596	0.775684	0.775684	1.30315	1.7065	1.17904	1.14801	0.527465	1.05493	1.24109	0.434383	4.37486	1.42726	0.58952	0.46541	0.279246	3.13376	1.7065	1.79959	1.98575	1.17904	0.403355	0.372328	1.73753	1.3652	0.341301	0.806711	0.93082	0.434383	0.496438	0.496438	0.600379
RCSOM-G16.4	Otocolobus_manul	3.75864	1.50346	1.76877	1.45924	1.1497	0.840166	1.76877	2.43206	2.03409	1.10548	1.01704	0.442193	0.884385	1.10548	0.309535	3.36066	1.1497	0.61907	0.397973	0.265316	3.05113	1.81299	1.90143	1.45924	0.884385	0.442193	0.486412	2.07831	1.41502	0.442193	0.840166	0.928605	0.486412	0.61907	0.530631	0.451037
BMNH-79.11.21.540	Otocolobus_manul	3.92582	1.47746	1.73074	1.51967	1.18197	0.802049	1.64631	2.44836	2.06844	1.13975	1.05533	0.54877	0.886475	1.13975	0.274385	3.58811	1.09754	0.67541	0.413688	0.185738	3.03934	1.77295	1.89959	1.51967	0.928688	0.464344	0.506557	2.11065	1.56188	0.379918	0.844262	1.01311	0.401024	0.54877	0.54877	0.504447
BMNH-79.526	Otocolobus_manul	3.92809	1.56279	1.73174	1.47831	1.18265	0.84475	1.64726	2.3653	1.98516	1.14041	1.05594	0.422375	0.929225	1.09818	0.278768	3.54795	1.18265	0.6758	0.380138	0.257649	2.95663	1.6895	1.81621	1.56279	0.929225	0.464613	0.50685	2.15411	1.47831	0.354795	0.84475	1.0137	0.422375	0.633563	0.549088	0.464613
BCMAG-Ab4139	Panthera_leo	4.44302	1.26735	1.38389	2.09769	1.15082	0.903172	0.844902	1.32562	1.39846	1.20908	1.19452	0.670095	1.10711	1.31106	0.466153	4.006	1.13625	0.655528	0.53899	0.233077	3.00086	1.74807	1.82091	2.11226	1.20908	0.509855	0.495288	1.71894	1.36932	0.393317	0.815768	0.844902	0.48072	0.407884	0.378749	0.524422
BCMAG-Ab4172	Panthera_leo	4.43301	1.20242	1.36177	1.9992	1.18793	0.847486	0.898191	1.37626	1.39075	1.23139	1.2169	0.753321	1.01409	1.17344	0.434608	3.96942	1.04306	0.70986	0.651913	0.296982	3.14367	1.69497	1.8833	2.17304	1.36177	0.507043	0.52153	1.69497	1.3328	0.405635	0.724347	0.811269	0.434608	0.362174	0.376661	0.478069
BCMAG-Ab4186	Panthera_leo	4.38419	1.13931	1.48543	2.03346	1.25469	0.836457	0.793192	1.38448	1.44217	1.31237	1.28353	0.735506	1.00952	1.197	0.43265	3.95154	1.09605	0.749927	0.620132	0.245169	3.17277	1.74502	1.90366	2.09114	1.29795	0.504759	0.548024	1.70176	1.38448	0.403807	0.764349	0.807614	0.418229	0.389385	0.34612	0.475915
BCMAG-Af1352	Panthera_leo	4.6186	1.3488	1.43054	2.11175	1.13081	0.831076	0.762955	1.2943	1.43054	1.2398	1.22618	0.68121	1.00819	1.26705	0.42235	4.11451	1.10356	0.640337	0.599465	0.245236	3.17444	1.7439	1.92101	2.1935	1.32155	0.463223	0.544968	1.79839	1.33517	0.42235	0.8447	0.817452	0.408726	0.395102	0.367853	0.51772
BCMAG-Af1367	Panthera_leo	4.66233	1.29167	1.37779	2.15279	1.14405	0.848815	0.799608	1.30398	1.29167	1.25477	1.24247	0.750402	1.07024	1.31628	0.44286	4.28098	1.11945	0.7381	0.627385	0.319843	3.19843	1.69763	1.88215	2.28811	1.40239	0.504368	0.51667	1.77144	1.27937	0.418257	0.676592	0.762703	0.393653	0.332145	0.332145	0.455162
BCMAG-Ab2183	Panthera_leo	4.29431	1.19532	1.29862	2.03648	1.26911	0.841153	0.841153	1.34289	1.29862	1.29862	1.26911	0.664068	0.959209	1.16581	0.442712	4.01392	1.13629	0.723096	0.619797	0.213977	3.09898	1.85939	1.97745	2.11026	1.23959	0.486983	0.50174	1.81512	1.41668	0.457469	0.796882	0.900181	0.457469	0.368927	0.383684	0.498789
HM-NH.23.20	Panthera_leo	4.64002	1.38296	1.53806	2.11968	1.25371	0.87889	0.898277	1.51221	1.18909	1.26664	1.15031	0.646242	1.00814	1.18909	0.42652	4.09718	1.08569	0.646242	0.555769	0.284347	3.11489	1.65438	1.75778	2.09383	1.26664	0.465295	0.516994	1.80948	1.39588	0.439445	0.762566	0.85304	0.45237	0.40067	0.348971	0.465295
BRSUVA-LionL-Bullet	Panthera_leo	4.73385	1.35253	1.46524	2.15403	1.28991	0.901686	0.688788	1.41515	1.31496	1.34001	1.28991	0.726358	1.05197	1.27739	0.450843	4.25796	1.1772	0.726358	0.576077	0.2943	3.06824	1.70318	1.8159	2.21664	1.32748	0.425796	0.500937	1.72823	1.36505	0.375702	0.688788	0.801499	0.425796	0.350656	0.350656	0.463366
BRSUVA-LionL-noP3	Panthera_leo	4.65944	1.13404	1.7627	2.00923	1.22033	0.887512	0.899839	1.26964	1.34359	1.33127	1.23266	0.71494	0.936818	1.17102	0.406776	4.14172	1.07241	0.690287	0.579348	0.277348	2.93372	1.65176	1.78735	2.14482	1.31894	0.505389	0.530042	1.77502	1.41755	0.369797	0.776573	0.838206	0.39445	0.419103	0.39445	0.480736
BRSUVA-LionS-Red	Panthera_leo	4.46762	1.48921	1.19431	2.09374	1.2238	0.884677	0.899421	1.47446	1.47446	1.26804	1.28278	0.722486	1.01738	1.26804	0.442338	3.9663	1.10585	0.781465	0.648763	0.258031	3.02265	1.71038	1.87257	2.06425	1.28278	0.442338	0.560295	1.72512	1.34176	0.398105	0.737231	0.76672	0.398105	0.38336	0.309637	0.471828
BMNH-77.857	Panthera_onca	4.65702	1.23678	1.90861	1.95442	1.22151	0.961942	0.885597	1.45055	1.3742	1.3284	1.29786	0.641295	1.02302	1.25205	0.56495	4.03099	1.31313	0.687101	0.549681	0.183227	3.11486	1.69485	1.86281	1.92388	1.06882	0.381723	0.442799	1.80173	1.3742	0.488605	0.732908	0.839791	0.381723	0.396992	0.396992	0.500057
BMNH-89.370	Panthera_onca	4.54999	1.28375	1.86875	1.93375	1.18625	0.909999	0.844999	1.43	1.44625	1.28375	1.3	0.649999	0.991249	1.2675	0.438749	4.19249	1.3	0.682499	0.568749	0.219375	3.16875	1.64125	1.80375	1.9825	1.21875	0.422499	0.406249	1.95	1.41375	0.503749	0.812499	0.763749	0.3575	0.37375	0.406249	0.497249
BMNH-1990.542	Panthera_onca	4.69745	1.37229	1.84731	1.98806	1.19636	0.844486	0.844486	1.26673	1.44266	1.21395	1.30192	0.598178	1.03801	1.26673	0.45743	4.18724	1.31951	0.633365	0.562991	0.167138	3.11404	1.68897	1.84731	1.97047	1.24914	0.45743	0.45743	2.00565	1.49544	0.51021	0.791706	0.826893	0.40465	0.369463	0.369463	0.522526
BMNH-1935.3.6.2	Panthera_onca	4.653	1.30284	1.93565	1.95426	1.06088	0.818927	0.856151	1.48896	1.48896	1.20978	1.20978	0.632807	1.06088	1.247	0.390852	4.07602	1.26561	0.614195	0.539747	0.23265	3.14542	1.58202	1.76814	1.93565	1.20978	0.428076	0.390852	1.91703	1.41451	0.446688	0.800315	0.930599	0.390852	0.483912	0.483912	0.487634
BMNH-1926.12.4.29	Panthera_onca	4.62638	1.3655	1.91577	1.97691	1.05979	0.77446	0.835602	1.18207	1.4674	1.18207	1.18207	0.591035	1.05979	1.26359	0.448372	4.11687	1.26359	0.591035	0.529894	0.213996	3.1386	1.69158	1.77311	1.87501	1.20245	0.448372	0.468752	1.93615	1.48778	0.509513	0.79484	0.917124	0.40761	0.427991	0.468752	0.520722
BMNH-1845.8.25.21	Panthera_onca	4.54525	1.31223	1.69258	1.97785	1.21714	0.836782	0.893835	1.52142	1.52142	1.19812	1.19812	0.665622	0.988924	1.27419	0.475444	4.14587	1.29321	0.608569	0.494462	0.190178	3.30909	1.69258	1.90178	1.93981	1.16008	0.399373	0.437409	1.95883	1.44535	0.532498	0.836782	0.836782	0.361338	0.418391	0.418391	0.484002
BMNH-1936.5.26.3	Panthera_onca	4.48771	1.38083	1.76665	1.9291	1.19808	0.852867	1.01532	1.40114	1.48236	1.29961	1.25899	0.629497	1.01532	1.25899	0.426434	3.98005	1.23869	0.629497	0.588884	0.203064	3.08657	1.66512	1.82757	1.86819	1.15746	0.426434	0.467046	1.78696	1.38083	0.44674	0.812254	0.812254	0.406127	0.406127	0.426434	0.50969
BMNH-1934.9.10.64	Panthera_onca	4.52042	1.36617	1.84835	1.88853	1.18535	0.783539	0.703176	1.14517	1.56708	1.24563	1.26572	0.622813	1.06481	1.28581	0.462087	4.1186	1.32599	0.602722	0.582631	0.13059	3.17434	1.68762	1.82826	1.90862	1.12508	0.482178	0.482178	1.92871	1.44653	0.482178	0.82372	0.924174	0.421905	0.482178	0.462087	0.540441
BMNH-1874.4.8.2	Panthera_onca	4.4748	1.2758	1.828	1.94226	1.08538	0.837836	0.856877	1.31388	1.48525	1.18059	1.18059	0.590293	1.08538	1.33292	0.418918	4.11301	1.25675	0.590293	0.533168	0.209459	3.12284	1.65663	1.78992	1.88513	1.10442	0.457001	0.457001	1.90417	1.5043	0.495085	0.799752	0.894961	0.399876	0.43796	0.495085	0.538881
BMNH-1928.5.2.139	Panthera_onca	4.45537	1.21856	1.75168	1.99921	1.18048	0.818722	0.856802	1.25664	1.48512	1.31376	1.27568	0.666402	0.952003	1.19952	0.418881	4.13169	1.25664	0.609282	0.609282	0.165648	3.00833	1.73264	1.84689	1.98017	1.19952	0.437921	0.418881	1.94209	1.54224	0.476001	0.742562	0.894882	0.418881	0.456961	0.456961	0.574058
BMNH-1870.3.10.19	Panthera_onca	4.48115	1.17075	1.75613	2.05891	1.13038	0.787229	0.8276	1.3726	1.49372	1.23131	1.19094	0.625746	1.04964	1.27168	0.403707	4.07744	1.27168	0.666117	0.56519	0.232132	3.12873	1.6552	1.83687	1.89742	1.17075	0.464263	0.444078	1.81668	1.41298	0.484449	0.787229	0.908341	0.383522	0.464263	0.444078	0.508671
BMNH-1845.8.25.23	Panthera_onca	4.66455	1.29172	1.82994	2.09905	1.13026	0.861148	0.879089	1.45319	1.50701	1.27378	1.2379	0.681742	1.11232	1.36348	0.520277	4.05457	1.25584	0.592039	0.538218	0.206317	3.21137	1.61465	1.84788	1.97346	1.18408	0.394693	0.394693	1.91964	1.34554	0.448515	0.735564	0.807327	0.412634	0.430574	0.394693	0.482602
BMNH-1845.8.25.22	Panthera_onca	4.70426	1.18491	2.06917	2.0338	1.18491	0.84889	0.866575	1.4325	1.37945	1.29102	1.27333	0.636667	1.04343	1.3087	0.424445	4.17371	1.20259	0.672038	0.548241	0.212222	3.20102	1.64472	1.82158	2.05148	1.23796	0.336019	0.389074	1.98074	1.41482	0.512871	0.795834	0.831204	0.40676	0.40676	0.424445	0.488996
BMNH-1884.2.8.1	Panthera_onca	4.55919	1.55725	1.61354	1.95126	1.0882	0.788008	0.844294	1.40716	1.51973	1.20077	1.18201	0.619149	1.0882	1.36963	0.412766	4.03385	1.18201	0.637911	0.525339	0.234526	3.03946	1.6323	1.74487	1.91373	1.21954	0.45029	0.45029	1.87621	1.38839	0.506576	0.788008	0.844294	0.412766	0.45029	0.412766	0.516896
BCMAG-Aa1899	Panthera_pardus	4.52867	1.29123	1.77778	1.81521	1.21638	0.842107	0.916961	1.60936	1.40351	1.17895	1.14152	0.617545	0.954388	1.14152	0.449124	4.11697	1.19766	0.617545	0.43041	0.261989	3.10644	1.71229	1.90878	2.11463	1.29123	0.467837	0.467837	1.80585	1.36609	0.43041	0.711113	0.935675	0.411697	0.43041	0.467837	0.503393
BCMAG-Ab3871	Panthera_pardus	4.32567	1.23591	1.71126	1.87763	1.18837	0.73679	0.974465	1.44981	1.56865	1.14084	1.11707	0.641721	1.04577	1.23591	0.546651	3.99293	1.28344	0.570418	0.570418	0.213907	3.01846	1.80632	2.02023	1.87763	1.18837	0.427814	0.451581	1.85386	1.52112	0.356511	0.760558	0.879395	0.427814	0.499116	0.427814	0.499116
BCMAG-Ab4129	Panthera_pardus	4.46348	1.35756	1.74837	1.97463	1.17244	0.781624	0.925607	1.4604	1.54268	1.23414	1.25471	0.617071	1.06959	1.27528	0.452519	3.9904	1.193	0.617071	0.473088	0.185121	2.79739	1.64552	1.76894	1.97463	1.17244	0.43195	0.411381	1.95406	1.4604	0.493657	0.822762	0.8639	0.411381	0.493657	0.452519	0.534795
BCMAG-Ab4140	Panthera_pardus	4.59829	1.37556	1.98473	1.90613	1.1594	0.786032	0.825333	1.53276	1.49346	1.13975	1.1201	0.609175	1.08079	1.2773	0.471619	4.02841	1.25765	0.589524	0.451968	0.275111	2.98692	1.61137	1.80787	1.90613	1.1987	0.412667	0.412667	1.88648	1.37556	0.49127	0.786032	0.864635	0.451968	0.471619	0.432318	0.477514
BCMAG-Ad2710	Panthera_pardus	4.55849	1.66605	1.61977	1.89744	0.995001	0.694187	0.879303	1.24954	1.61977	1.08756	1.08756	0.647907	1.04128	1.24954	0.393372	4.11884	1.27268	0.578489	0.485931	0.242965	2.84616	1.66605	1.78175	2.01314	1.27268	0.439651	0.416512	1.85116	1.48093	0.50907	0.879303	0.925582	0.439651	0.50907	0.462791	0.53221
BCMAG-Af1357	Panthera_pardus	4.47886	1.52073	1.58322	1.9582	1.16659	0.854108	0.854108	1.52073	1.45823	1.16659	1.18742	0.583293	1.12492	1.4374	0.479134	3.99972	1.24991	0.562461	0.458302	0.239567	2.81231	1.58322	1.70822	1.8957	1.14575	0.416638	0.43747	1.85404	1.35407	0.479134	0.895772	0.87494	0.416638	0.479134	0.458302	0.499966
BCMAG-Af1416	Panthera_pardus	4.59597	1.37633	1.89246	1.99077	1.15514	0.737322	1.05683	1.27802	1.62211	1.22887	1.13056	0.540703	1.15514	1.35176	0.319506	4.17816	1.25345	0.56528	0.56528	0.159753	2.80182	1.69584	1.86788	2.03992	1.25345	0.393238	0.368661	1.8433	1.54838	0.393238	0.884786	0.983096	0.466971	0.516125	0.491548	0.589858
BCMAG-Ab2185	Panthera_pardus	4.62409	1.35666	1.83435	1.98721	1.18469	0.859852	0.898068	1.56684	1.4713	1.14647	1.10825	0.687882	1.12736	1.10825	0.496803	4.06997	1.26112	0.592343	0.458588	0.238848	2.98082	1.62417	1.81524	1.949	1.2229	0.458588	0.43948	1.85346	1.35666	0.420372	0.840744	0.840744	0.382156	0.458588	0.420372	0.493937
HM-NH.74.11.21	Panthera_pardus	4.72763	1.4722	1.74176	2.01132	1.1197	0.787938	0.850144	1.26485	1.57588	1.20264	1.18191	0.580586	1.18191	1.36852	0.425072	4.31293	1.30632	0.622057	0.47691	0.212536	2.86146	1.67955	1.78323	2.1461	1.29595	0.414704	0.373234	1.8869	1.32705	0.414704	0.829409	0.891614	0.414704	0.456175	0.466542	0.5443
BRSUVA-LeopardS	Panthera_pardus	4.40285	1.46762	1.70433	1.87003	1.15989	0.804821	0.994191	1.42027	1.58597	1.15989	1.08888	0.639123	1.04153	1.27825	0.473424	4.04778	1.27825	0.59178	0.473424	0.248548	2.86422	1.65699	1.87003	1.8937	1.15989	0.449753	0.449753	1.77534	1.3966	0.402411	0.828493	0.875835	0.402411	0.497096	0.426082	0.520767
BCMAG-Ab2866	Panthera_tigris	4.54493	1.27092	1.47814	2.15504	1.11896	0.870305	0.815048	1.25711	1.28474	1.24329	1.33999	0.66309	1.29855	1.49195	0.483503	4.07524	1.27092	0.676904	0.552575	0.200308	3.06679	1.58865	1.76824	2.12741	1.27092	0.455874	0.497317	1.61628	1.29855	0.428246	0.828862	0.856491	0.400617	0.428246	0.400617	0.455874
BCMAG-Ab4126	Panthera_tigris	4.59256	1.42151	1.43517	2.17326	1.10713	0.956783	0.792763	1.44884	1.25749	1.24382	1.29849	0.683416	1.28482	1.54452	0.451055	4.1005	1.24382	0.669748	0.57407	0.239196	3.10271	1.62653	1.73588	2.05025	1.23015	0.41005	0.478391	1.80422	1.39417	0.396381	0.847436	0.806431	0.437386	0.341708	0.32804	0.478391
BCMAG-Ab4132	Panthera_tigris	4.52423	1.37369	1.52301	2.10533	1.10493	0.940682	0.880956	1.34383	1.35876	1.17958	1.22438	0.656984	1.25424	1.46328	0.522601	4.03149	1.13479	0.61219	0.537532	0.194109	3.03109	1.64246	1.77684	2.01575	1.19452	0.492738	0.492738	1.77684	1.31397	0.447944	0.791367	0.82123	0.403149	0.433012	0.373286	0.492738
BCMAG-Ab4136	Panthera_tigris	4.18191	1.25457	1.42185	1.94041	1.20439	0.752744	0.936748	1.15421	1.47203	1.25457	1.22112	0.618923	1.22112	1.35494	0.434919	3.8139	1.10402	0.669106	0.602195	0.17564	2.92734	1.73967	1.80659	1.90695	1.12075	0.552012	0.518557	1.77313	1.52222	0.434919	0.903293	0.953476	0.434919	0.368008	0.468374	0.552012
BCMAG-Ab4138	Panthera_tigris	4.45117	1.29377	1.5402	2.12547	1.09354	0.862511	0.877913	1.29377	1.43238	1.15515	1.18595	0.631481	1.32457	1.5402	0.477461	3.95831	1.18595	0.600677	0.539069	0.169422	3.03419	1.74042	1.84824	2.03306	1.18595	0.492863	0.508265	1.74042	1.47859	0.415853	0.831707	0.831707	0.431255	0.415853	0.400451	0.508265
BCMAG-Ab4143	Panthera_tigris	4.46084	1.21798	1.52247	2.22281	1.1114	0.822134	0.77646	1.09618	1.355	1.1723	1.2941	0.654662	1.2941	1.55292	0.456741	4.14112	1.20275	0.608988	0.608988	0.152247	3.04494	1.70517	1.79651	2.14668	1.2332	0.471966	0.441516	1.82696	1.56814	0.411067	0.806909	0.867808	0.48719	0.411067	0.426292	0.555702
BCMAG-Ab4148	Panthera_tigris	4.42138	1.2359	1.60144	1.93218	1.2359	0.852943	0.887757	1.2533	1.51441	1.37515	1.37515	0.661466	1.2533	1.40997	0.34814	3.95139	1.07923	0.678873	0.678873	0.121849	3.02882	1.68848	1.84514	1.93218	1.16627	0.557024	0.52221	1.82773	1.47959	0.365547	0.835536	0.835536	0.452582	0.452582	0.382954	0.539617
BCMAG-Ab4149	Panthera_tigris	4.40343	1.16202	1.636	2.06411	1.22317	0.917381	0.902091	1.31491	1.36078	1.19259	1.25375	0.688035	1.20788	1.46781	0.48927	3.86829	1.13144	0.688035	0.596297	0.244635	3.05794	1.71244	1.86534	1.95708	1.20788	0.48927	0.550428	1.68186	1.29962	0.336373	0.733905	0.779774	0.428111	0.397532	0.412821	0.443401
BCMAG-Ab4151	Panthera_tigris	4.65276	1.30488	1.56849	2.21434	1.10717	0.85674	0.764476	1.34442	1.26534	1.21262	1.26534	0.63267	1.30488	1.58167	0.487683	4.05963	1.23898	0.63267	0.527225	0.184529	3.08426	1.67394	1.81893	2.09572	1.23898	0.500864	0.448141	1.72666	1.37078	0.43496	0.817198	0.790837	0.43496	0.42178	0.395419	0.481093
BCMAG-Ab4153	Panthera_tigris	4.72465	1.21453	1.7217	2.18882	1.1478	0.880867	0.814135	1.29461	1.29461	1.26792	1.26792	0.640631	1.3213	1.50815	0.45378	4.12406	1.16114	0.627284	0.560552	0.173504	2.98294	1.62827	1.7217	2.08205	1.17449	0.480473	0.440434	1.80177	1.44142	0.440434	0.787442	0.880867	0.45378	0.413741	0.387048	0.49382
BCMAG-Ab4154	Panthera_tigris	4.49532	1.18908	1.55161	2.10265	1.14558	0.84106	0.797557	1.17458	1.3631	1.26159	1.33409	0.71055	1.27609	1.49361	0.493035	4.08929	1.17458	0.623544	0.551039	0.130509	3.11772	1.76913	1.85613	2.08815	1.20359	0.478534	0.507536	1.79813	1.4066	0.449532	0.899064	0.797557	0.478534	0.406029	0.362526	0.536538
BCMAG-Ab4158	Panthera_tigris	4.5993	1.34377	1.52386	2.07799	1.14982	0.886611	0.789638	1.37148	1.28836	1.2468	1.28836	0.692665	1.21909	1.4823	0.443306	3.96204	1.10826	0.651105	0.554132	0.207799	3.22782	1.63469	1.82864	2.07799	1.20524	0.581839	0.581839	1.80093	1.32992	0.360186	0.706518	0.775785	0.387892	0.429452	0.415599	0.457159
BCMAG-Ab4173	Panthera_tigris	4.71917	1.27582	1.72853	2.12637	1.16607	0.932859	0.795674	1.23467	1.27582	1.35813	1.35813	0.658489	1.27582	1.53647	0.452711	4.11556	1.20723	0.727082	0.562459	0.178341	3.15526	1.67366	1.76969	2.04406	1.13864	0.452711	0.425274	1.83828	1.31698	0.438993	0.83683	0.754519	0.397837	0.384119	0.411556	0.480148
BCMAG-Ab4175	Panthera_tigris	4.73398	1.32977	1.66221	2.16752	1.09041	0.877647	0.731373	1.19679	1.28988	1.18349	1.24998	0.664884	1.32977	1.54253	0.452121	4.12228	1.09041	0.638289	0.545205	0.212763	3.37761	1.64891	1.82178	2.06114	1.23668	0.465419	0.478717	1.86168	1.46275	0.412228	0.811159	0.771266	0.438824	0.385633	0.398931	0.492014
BCMAG-Ab4184	Panthera_tigris	4.74687	1.27959	1.69236	2.18769	1.11448	0.85306	0.660434	1.15576	1.26583	1.23831	1.27959	0.660434	1.33463	1.59605	0.454048	4.15523	1.16952	0.687952	0.56412	0.220145	3.21961	1.69236	1.80243	2.06386	1.2108	0.467807	0.522843	1.73364	1.34839	0.412771	0.866819	0.798024	0.42653	0.371494	0.371494	0.488446
BCMAG-Ab4189	Panthera_tigris	4.67714	1.25552	1.72461	2.1937	1.07616	0.938188	0.827813	1.37969	1.35209	1.20033	1.29691	0.593266	1.3107	1.58664	0.469094	4.11147	1.17273	0.66225	0.524281	0.144867	3.25606	1.72461	1.83498	2.09713	1.17273	0.482891	0.455297	1.82119	1.29691	0.455297	0.758828	0.800219	0.4415	0.413906	0.400109	0.496688
BCMAG-Ab2184	Panthera_tigris	4.35935	1.24767	1.50322	2.08948	1.11238	0.901934	0.886901	1.41303	1.3529	1.17251	1.21761	0.646386	1.21761	1.42806	0.511096	3.89335	1.20258	0.67645	0.586257	0.195419	2.99141	1.69864	1.83393	1.92413	1.17251	0.465999	0.511096	1.63851	1.36793	0.420902	0.841805	0.856837	0.450967	0.420902	0.375806	0.47577
BMNH-10.3.10.8	Panthera_tigris	4.5806	1.22339	1.55058	2.10537	1.15226	0.924655	0.825077	1.36564	1.28029	1.25184	1.25184	0.682822	1.25184	1.46522	0.512117	4.08271	1.15226	0.654371	0.554793	0.184931	3.14383	1.6786	1.80663	2.07692	1.18071	0.455215	0.440989	1.77818	1.3941	0.412538	0.768175	0.867753	0.412538	0.426764	0.384088	0.517807
BRSUVA-Tiger	Panthera_tigris	4.4472	1.09183	1.57116	2.11708	1.14509	0.892102	0.758953	1.22498	1.26492	1.26492	1.3315	0.679063	1.25161	1.50459	0.466023	4.02112	1.13177	0.652433	0.612488	0.13315	3.08907	1.59779	1.77089	2.02387	1.18503	0.505968	0.545913	1.86409	1.47796	0.519283	0.798897	0.838842	0.412764	0.439394	0.439394	0.479338
BMNH-75.2283	Panthera_uncia	4.27401	1.50463	1.59185	1.72269	1.26476	1.00308	1.11211	1.74449	1.57004	1.22115	1.17753	0.763216	0.785022	1.11211	0.479736	3.90331	1.19934	0.632379	0.479736	0.174449	2.98745	1.70088	1.80991	1.83172	1.00308	0.479736	0.436123	1.83172	1.33018	0.523348	0.806828	0.872247	0.392511	0.45793	0.392511	0.575683
BMNH-81.1498	Panthera_uncia	4.1988	1.38396	1.82964	1.75927	1.31359	1.00865	1.12593	1.6889	1.54816	1.29013	1.17285	0.656795	0.820994	1.17285	0.469139	3.84694	1.24322	0.609881	0.516053	0.129013	2.86175	1.66545	1.78273	1.73582	1.03211	0.445683	0.469139	1.87656	1.40742	0.516053	0.891365	0.891365	0.375312	0.445683	0.492596	0.553585
BMNH-1938.6.28.3	Panthera_uncia	4.16428	1.52772	1.60165	1.65093	1.20739	0.887065	1.15811	1.67557	1.65093	1.18275	1.10883	0.591377	0.911706	1.03491	0.468173	3.84395	1.20739	0.566736	0.492814	0.197126	2.80904	1.65093	1.74949	1.74949	1.01027	0.492814	0.443532	1.84805	1.35524	0.517455	0.862424	0.960987	0.418892	0.492814	0.492814	0.577824
BMNH-84.2090	Panthera_uncia	4.19968	1.70387	1.48789	1.63188	1.24791	1.03192	1.19991	1.89586	1.67987	1.19991	1.10392	0.575957	0.743944	0.983926	0.479964	3.88771	1.2719	0.599955	0.479964	0.191986	2.99977	1.72787	1.82386	1.77587	1.03192	0.479964	0.431968	1.89586	1.3679	0.52796	0.863935	0.911931	0.383971	0.431968	0.455966	0.544759
BMNH-47.37	Panthera_uncia	4.14883	1.58949	1.67031	1.67031	1.21232	0.862095	1.21232	1.64337	1.72419	1.15844	1.07762	0.56575	0.889036	1.02374	0.457988	3.82555	1.18538	0.56575	0.511869	0.175113	2.74793	1.67031	1.77807	1.77807	1.02374	0.484929	0.484929	1.85889	1.34702	0.53881	0.862095	0.969857	0.404107	0.484929	0.511869	0.56575
HM-NH.35.93	Pardofelis_marmorata	4.46743	1.80502	1.9404	1.57939	1.12814	0.676883	1.17326	2.34653	1.89527	1.17326	1.12814	0.496381	0.722008	0.947636	0.315879	4.01617	1.39889	0.631757	0.451255	0.180502	3.11366	1.7599	1.89527	1.62452	0.947636	0.40613	0.40613	2.07577	1.53427	0.40613	0.857385	1.03789	0.40613	0.631757	0.541506	0.586632
BMNH-56.10.1.5	Pardofelis_marmorata	4.3764	1.79919	1.94507	1.55605	1.11841	0.632146	1.4588	2.33408	2.04232	1.11841	1.06979	0.486266	0.778026	0.972533	0.29176	3.89013	1.26429	0.58352	0.43764	0.194507	3.01485	1.79919	1.89644	1.60468	1.02116	0.43764	0.43764	2.09095	1.50743	0.389013	0.7294	1.02116	0.486266	0.58352	0.534893	0.607833
BMNH-26.10.4.47	Pardofelis_marmorata	4.3102	1.93717	1.84031	1.50131	1.11387	0.774867	1.54973	2.37303	2.08246	1.06544	1.01701	0.435863	0.774867	0.920155	0.242146	3.87434	1.25916	0.581151	0.435863	0.242146	3.05104	1.74345	1.84031	1.64659	0.968584	0.387434	0.387434	1.93717	1.50131	0.435863	0.920155	1.06544	0.435863	0.62958	0.581151	0.578729
BMNH-55.1645	Pardofelis_marmorata	4.42088	1.90098	1.94519	1.5031	1.14943	0.707341	1.10522	2.5199	1.90098	1.14943	1.10522	0.486297	0.75155	0.928385	0.309462	3.93458	1.28206	0.618923	0.397879	0.243148	3.18303	1.63573	1.81256	1.63573	0.972594	0.35367	0.397879	2.12202	1.54731	0.486297	0.839967	1.0168	0.397879	0.663132	0.574715	0.537137
BMNH-61.1277	Pardofelis_marmorata	4.3852	1.90661	2.00194	1.47762	1.0963	0.714979	1.47762	2.43093	2.09727	1.0963	1.04864	0.476652	0.762644	0.953305	0.333657	3.90855	1.28696	0.619648	0.428987	0.190661	3.00291	1.66828	1.81128	1.66828	1.00097	0.381322	0.381322	2.04961	1.52529	0.381322	0.810309	1.04864	0.428987	0.667313	0.571983	0.552917
BMNH-95.7.30.4	Pardofelis_marmorata	4.20801	1.90828	1.85935	1.46791	1.1254	0.587164	1.37005	2.64224	2.00614	1.1254	1.07647	0.440373	0.782886	0.929677	0.391443	3.81657	1.27219	0.636095	0.440373	0.195721	3.08261	1.81042	1.90828	1.6147	0.929677	0.440373	0.440373	2.00614	1.51684	0.342513	0.880747	1.02754	0.440373	0.587164	0.538234	0.577378
BMNH-32.2.9.1	Pardofelis_marmorata	4.25877	1.75083	1.89279	1.56155	1.04103	0.709795	1.46691	2.4133	1.94011	1.04103	1.04103	0.473197	0.851755	0.946394	0.331238	3.78558	1.23031	0.615156	0.425877	0.236598	3.07578	1.65619	1.75083	1.60887	0.993714	0.378558	0.378558	1.98743	1.51423	0.378558	0.946394	1.04103	0.425877	0.662476	0.662476	0.527615
RCSOM-A125.1	Pardofelis_temminckii	4.47222	1.46798	1.98007	1.70696	1.09245	0.7852	1.12659	1.91179	1.84351	1.05831	1.05831	0.477948	0.853478	1.09245	0.341391	4.16497	1.3997	0.580365	0.477948	0.238974	3.00424	1.70696	1.87765	1.77523	1.05831	0.37553	0.409669	1.84351	1.53626	0.37553	0.887617	1.05831	0.443809	0.580365	0.512087	0.547933
BMNH-23.1.7.7	Pardofelis_temminckii	4.58864	1.64323	2.04629	1.61223	1.14716	0.7131	0.961135	1.89126	1.76725	1.14716	1.05415	0.49607	0.868122	1.05415	0.341048	4.09257	1.4262	0.589083	0.434061	0.240284	3.06943	1.70524	1.79825	1.73624	1.08515	0.434061	0.434061	1.86026	1.4262	0.403056	0.837117	0.992139	0.465065	0.589083	0.527074	0.531725
BMNH-1868.9.12.1	Pardofelis_temminckii	4.43447	1.45704	1.93216	1.67876	1.17197	0.79187	1.07694	1.93216	1.64709	1.17197	1.07694	0.570146	0.855219	1.14029	0.348423	3.95935	1.26699	0.633496	0.475122	0.256566	3.00911	1.71044	1.86881	1.74211	0.950244	0.443447	0.443447	1.80546	1.45704	0.443447	0.823545	0.918569	0.443447	0.538471	0.475122	0.505213
BMNH-8.8.7.1	Pardofelis_temminckii	4.55868	1.48976	1.99628	1.72813	1.10243	0.744882	0.953449	1.72813	1.63874	1.10243	1.04283	0.476724	0.953449	1.13222	0.357543	4.14154	1.45997	0.595906	0.411175	0.327748	2.89014	1.54935	1.72813	1.81751	1.16202	0.417134	0.417134	1.8771	1.45997	0.417134	0.804472	0.983244	0.476724	0.56611	0.536315	0.50354
BMNH-50.510	Pardofelis_temminckii	4.37062	1.68948	1.90985	1.61603	1.10184	0.661102	1.24875	1.8364	1.94658	0.954926	0.954926	0.477463	0.88147	1.02838	0.293823	4.00334	1.35893	0.550919	0.404007	0.235059	2.82805	1.68948	1.76294	1.61603	1.06511	0.440735	0.440735	1.79967	1.39566	0.477463	0.918198	1.10184	0.514191	0.69783	0.587646	0.567446
BMNH-32.3.1.33	Pardofelis_temminckii	4.39496	1.7303	1.86873	1.62648	1.03818	0.726726	1.10739	1.83412	1.86873	1.00357	0.968969	0.484484	0.830544	1.03818	0.328757	4.0143	1.38424	0.588302	0.449878	0.316645	2.8723	1.69569	1.79951	1.69569	1.00357	0.449878	0.484484	1.93794	1.52266	0.380666	0.795938	1.03818	0.484484	0.622908	0.51909	0.513899
RCSOM-A124.54	Prionailurus_bengalensis	4.43523	1.5109	2.04703	1.65712	1.12099	0.731081	1.26721	2.14451	1.90081	1.12099	1.02351	0.38991	1.02351	1.16973	0.341171	4.04532	1.46216	0.633604	0.438649	0.292433	2.97306	1.60838	1.7546	1.7546	0.926037	0.38991	0.438649	1.7546	1.46216	0.292433	0.77982	1.02351	0.487388	0.682343	0.536126	0.475203
BMNH-1938.11.30.27	Prionailurus_bengalensis	4.51214	1.52095	2.12933	1.62234	1.11536	0.709775	1.21676	2.18002	1.92653	1.11536	1.06466	0.461354	0.963266	1.11536	0.319399	4.05586	1.36885	0.659077	0.441075	0.28391	3.04189	1.62234	1.77444	1.77444	0.963266	0.400516	0.405586	1.82514	1.47025	0.28391	0.811172	1.01396	0.506982	0.659077	0.506982	0.468959
BMNH-36.5.18.6	Prionailurus_bengalensis	4.62848	1.59603	2.02164	1.54283	1.11722	0.691612	1.27682	2.23444	2.02164	1.17042	1.06402	0.436248	0.904416	1.11722	0.212804	4.30928	1.54283	0.58521	0.441568	0.289945	3.03245	1.59603	1.75563	1.86203	1.01082	0.430928	0.457528	1.86203	1.38322	0.276645	0.798014	1.06402	0.516049	0.638411	0.521369	0.510729
BMNH-27.12.1.66	Prionailurus_bengalensis	4.57696	1.70514	2.01925	1.6154	1.12181	0.717955	1.12181	2.10899	1.9295	1.16668	1.07693	0.493594	0.942316	1.12181	0.251284	4.21799	1.48078	0.628211	0.412824	0.302887	2.96157	1.66027	1.79489	1.79489	0.987188	0.385901	0.390388	1.88463	1.43591	0.381414	0.8077	0.942316	0.493594	0.583339	0.493594	0.502569
BMNH-27.12.1.72	Prionailurus_bengalensis	4.53685	1.77732	2.01118	1.54347	1.21606	0.748347	1.02898	2.1515	1.77732	1.21606	1.07575	0.467717	0.935434	1.12252	0.275953	4.11591	1.49669	0.654803	0.416268	0.297	2.94662	1.63701	1.77732	1.8241	0.982205	0.355465	0.369496	1.77732	1.40315	0.388205	0.84189	0.982205	0.434977	0.654803	0.56126	0.488764
BMNH-1938.8.8.2	Prionailurus_bengalensis	4.56594	1.60895	2.13077	1.56546	1.13061	0.782732	1.08713	2.08729	1.91334	1.1741	1.08713	0.434851	0.913187	1.08713	0.304396	4.13109	1.39152	0.652277	0.434851	0.265259	2.95699	1.65243	1.78289	1.78289	0.956672	0.387018	0.404412	1.86986	1.34804	0.391366	0.826217	1.04364	0.478336	0.608792	0.521821	0.487033
BMNH-8.2.26.19	Prionailurus_bengalensis	4.40221	1.73121	1.92906	1.53336	1.18711	0.692483	1.43443	2.07745	2.02799	1.18711	1.08819	0.41549	0.840872	1.03872	0.267101	4.05597	1.38497	0.64302	0.430329	0.27452	2.86886	1.73121	1.83013	1.83013	0.939799	0.41549	0.435275	1.83013	1.38497	0.326456	0.840872	0.989262	0.474846	0.64302	0.544094	0.516889
BMNH-70.7.18.25	Prionailurus_bengalensis	4.38426	1.71339	2.06615	1.51181	1.15906	0.655119	1.36063	2.11654	1.96536	1.15906	1.05827	0.448505	0.907088	1.05827	0.24189	4.0315	1.41103	0.655119	0.428347	0.24189	2.87245	1.71339	1.86457	1.76378	0.907088	0.418268	0.418268	1.81418	1.36063	0.393072	0.856694	1.05827	0.48378	0.655119	0.554332	0.506458
BMNH-75.2246	Prionailurus_planiceps	5.18632	1.92482	2.19215	1.65748	1.12281	0.588139	0.855475	2.29909	2.03175	1.12281	1.12281	0.384964	0.962409	1.17628	0.0588139	4.91898	1.71095	0.641606	0.459818	0.347537	3.20803	1.65748	1.81788	2.08522	1.17628	0.37427	0.417044	2.19215	1.76442	0.278029	0.962409	1.06934	0.406351	0.695073	0.588139	0.550712
BMNH-92.10.1.2	Prionailurus_planiceps	5.08912	1.81055	2.29989	1.51695	1.17441	0.63614	1.12548	2.25096	1.90842	1.27228	1.22335	0.430618	0.782942	0.978677	0.117441	4.79552	1.71269	0.734008	0.489339	0.286263	2.98497	1.66375	1.85949	1.95735	1.17441	0.269136	0.322963	2.15309	1.66375	0.244669	0.831876	1.12548	0.538272	0.63614	0.587206	0.555399
BMNH-72.8.19.18	Prionailurus_planiceps	5.24577	2.01006	2.25519	1.61785	1.07857	0.58831	1.07857	2.35324	1.86298	1.07857	1.07857	0.431428	0.931491	1.12759	0.107857	4.80453	1.7159	0.637336	0.451038	0.370145	3.0396	1.61785	1.81396	2.01006	1.12759	0.348084	0.328473	2.01006	1.61785	0.220616	0.882465	1.07857	0.539284	0.637336	0.58831	0.544187
BMNH-29.3.9.1	Prionailurus_planiceps	5.03814	1.85075	2.1592	1.5937	1.0796	0.616915	1.0796	2.26202	1.95357	1.23383	1.13101	0.447264	0.925373	1.0796	0.0925373	4.78109	1.64511	0.668325	0.457546	0.367579	3.08458	1.64511	1.79934	2.05638	1.13101	0.344444	0.329022	2.10779	1.5937	0.221061	0.873964	1.0796	0.514096	0.719735	0.565506	0.544942
BMNH-60.5.4.51	Prionailurus_planiceps	5.16038	1.9889	1.93514	1.55886	1.07508	0.53754	1.07508	2.25767	1.9889	1.12883	1.07508	0.430032	0.806309	1.02133	0.102133	4.7841	1.66637	0.645047	0.451533	0.341338	2.90271	1.66637	1.82763	2.04265	1.18259	0.327899	0.322524	2.20391	1.66637	0.284896	0.913817	1.07508	0.53754	0.752555	0.591293	0.599357
BMNH-79.11.21.627	Prionailurus_planiceps	4.98017	1.80653	2.09948	1.56241	1.02533	0.585902	1.07415	2.24596	1.85536	1.12298	1.1718	0.449192	0.830028	1.02533	0.122063	4.58957	1.61123	0.683553	0.463839	0.32957	2.97834	1.61123	1.75771	2.00183	1.1718	0.327129	0.297834	2.09948	1.61123	0.322246	0.830028	1.12298	0.537077	0.732378	0.585902	0.588344
BMNH-61.1276	Prionailurus_planiceps	4.95223	1.76865	2.12238	1.56652	1.06119	0.606395	1.11172	2.32451	1.86972	1.16226	1.16226	0.454796	0.909592	1.11172	0.136439	4.49743	1.61705	0.707461	0.475009	0.336044	2.93091	1.66759	1.81918	1.92025	1.01066	0.293091	0.288038	2.02132	1.56652	0.323411	0.909592	1.11172	0.45985	0.707461	0.606395	0.533122
RCSOM-A124.61	Prionailurus_rubiginosus	4.43107	1.78323	1.94535	1.62112	1.13478	0.756523	1.2969	2.10746	1.94535	1.18882	1.08075	0.432299	0.972673	1.13478	0.140497	3.99877	1.40497	0.648449	0.432299	0.270187	3.02609	1.67516	1.89131	1.62112	0.864598	0.486336	0.432299	1.83727	1.45901	0.378262	0.810561	1.08075	0.486336	0.648449	0.648449	0.467423
RCSOM-A124.62	Prionailurus_rubiginosus	4.47611	1.71308	2.04464	1.5473	1.16047	0.718388	1.21573	2.15516	1.98938	1.16047	1.10521	0.442085	0.99469	1.10521	0.143678	4.03402	1.49204	0.663127	0.442085	0.276303	3.03933	1.65782	1.8236	1.60256	0.884169	0.386824	0.386824	1.87886	1.49204	0.386824	0.884169	1.10521	0.552606	0.607866	0.663127	0.472478
RCSOM-A124.63	Prionailurus_rubiginosus	4.44015	1.64225	2.06802	1.45978	1.15566	0.669064	1.5206	2.37214	2.18966	1.21648	1.09483	0.425768	0.851536	1.03401	0.133813	4.01438	1.45978	0.669064	0.486592	0.243296	2.98038	1.70307	1.88554	1.70307	0.91236	0.425768	0.364944	1.88554	1.5206	0.364944	0.790712	1.09483	0.486592	0.669064	0.669064	0.526128
RCSOM-A124.64	Prionailurus_rubiginosus	4.61192	1.72178	2.27521	1.47581	1.16835	0.676415	1.53731	2.3982	2.15223	1.22985	1.10686	0.491938	0.860892	1.04537	0.07994	4.30446	1.53731	0.676415	0.491938	0.307461	3.07461	1.72178	1.90626	1.66029	0.922384	0.430446	0.430446	1.90626	1.5988	0.307461	0.860892	1.10686	0.368954	0.614923	0.676415	0.467341
BMNH-20.2.8.5	Prionailurus_rubiginosus	4.40984	1.63955	2.03531	1.52648	1.18726	0.678437	1.46995	2.26146	1.97877	1.2438	1.07419	0.429676	0.961118	1.07419	0.135687	4.01408	1.46995	0.6219	0.474906	0.234626	2.88336	1.63955	1.80916	1.63955	0.904582	0.452291	0.452291	1.8657	1.46995	0.401408	0.848046	1.07419	0.531442	0.6219	0.6219	0.477732
BMNH-15.3.1.49	Prionailurus_rubiginosus	4.42463	1.70178	1.98541	1.5316	1.19125	0.737438	1.3047	2.21231	2.04214	1.19125	1.13452	0.453808	0.907616	1.07779	0.085089	4.02755	1.36142	0.737438	0.476499	0.300648	3.11993	1.70178	1.87196	1.70178	0.907616	0.43679	0.431118	1.92868	1.41815	0.357374	0.85089	1.13452	0.510534	0.680712	0.623986	0.482171
BMNH-66.5.8.1	Prionailurus_rubiginosus	4.56046	1.75402	2.10483	1.52015	1.22782	0.701609	1.46168	2.3387	2.04636	1.22782	1.11088	0.438505	0.877011	1.05241	0.152015	4.15119	1.40322	0.643141	0.450199	0.230946	3.0403	1.69555	1.87096	1.75402	0.877011	0.444352	0.403425	1.98789	1.46168	0.333264	0.818544	1.05241	0.403425	0.701609	0.643141	0.491126
BMNH-34.4.17.2	Prionailurus_rubiginosus	4.49516	1.71526	2.01099	1.53782	1.12379	0.709762	1.47867	2.24758	2.01099	1.18294	1.06464	0.443601	0.887203	1.0055	0.147867	4.08113	1.47867	0.650615	0.46726	0.27799	2.83905	1.59697	1.77441	1.65611	0.94635	0.425857	0.419943	1.83355	1.41952	0.337137	0.887203	1.12379	0.502748	0.709762	0.591469	0.502748
RCSOM-A124.71	Prionailurus_viverrinus	4.80687	1.59168	2.00551	1.78268	1.14601	0.795839	0.955006	2.06918	1.62351	1.24151	1.17784	0.477503	1.11417	1.33701	0.222835	4.42486	1.52801	0.700338	0.44567	0.254668	3.05602	1.71901	1.94185	1.94185	1.11417	0.350169	0.382003	1.87818	1.49618	0.350169	0.827672	0.891339	0.44567	0.509337	0.413836	0.498195
RCSOM-A124.7	Prionailurus_viverrinus	4.69804	1.72888	1.9168	1.72888	1.05236	0.714102	0.977193	1.9168	1.65371	1.16511	1.12753	0.488596	1.05236	1.24028	0.225506	4.35978	1.50337	0.638934	0.451012	0.26309	2.93158	1.76646	1.84163	1.87922	1.05236	0.375843	0.451012	1.76646	1.35304	0.338259	0.826855	1.01478	0.451012	0.563765	0.563765	0.546852
RCSOM-G16.31	Prionailurus_viverrinus	4.7684	1.43753	1.99852	1.71803	1.15704	0.736298	1.05185	1.89334	1.71803	1.26222	1.22716	0.490865	1.05185	1.26222	0.175309	4.45285	1.50766	0.736298	0.420741	0.262963	3.05038	1.71803	1.96346	1.96346	1.12198	0.38568	0.420741	1.9284	1.57778	0.315556	0.736298	0.98173	0.455803	0.490865	0.525927	0.501384
BMNH-75.2286	Prionailurus_viverrinus	4.80589	1.634	1.95439	1.7942	1.08933	0.736903	0.929138	1.89032	1.56992	1.21749	1.18545	0.480589	1.0573	1.24953	0.198643	4.22918	1.47381	0.672824	0.41651	0.246702	3.13985	1.73012	1.89032	1.82624	1.08933	0.352432	0.480589	1.92236	1.31361	0.41651	0.86506	1.02526	0.44855	0.544667	0.544667	0.486997
BMNH-14.1.19.1	Prionailurus_viverrinus	4.75639	1.57406	2.08734	1.71093	1.095	0.650154	0.855466	1.88202	1.67671	1.23187	1.19765	0.444842	1.02656	1.23187	0.181359	4.31155	1.4714	0.684373	0.444842	0.229265	3.04546	1.81359	1.98468	1.84781	1.095	0.410624	0.444842	1.95046	1.53984	0.376405	0.821247	1.02656	0.479061	0.581717	0.513279	0.528678
BMNH-43.1.12.120	Prionailurus_viverrinus	4.87066	1.73682	1.96337	1.77458	0.981683	0.64187	1.01944	2.07664	1.77458	1.13271	1.13271	0.415328	1.13271	1.28374	0.181234	4.53085	1.54804	0.64187	0.453085	0.258636	2.86954	1.69907	1.81234	1.96337	1.13271	0.415328	0.415328	1.81234	1.39701	0.339814	0.792898	0.981683	0.490842	0.604113	0.528599	0.543702
RCSOM-A123.4	Puma_concolor	4.34697	1.47672	1.76791	1.8719	1.24794	0.95675	0.935952	1.76791	1.58072	1.31033	1.20634	0.644767	0.95675	1.20634	0.311984	3.9518	1.28953	0.665566	0.457576	0.145592	3.20303	1.74711	1.9135	1.80951	1.14394	0.478375	0.499174	1.78871	1.33113	0.540772	0.811158	0.852756	0.415978	0.457576	0.436777	0.463816
RCSOM-G98.12	Puma_concolor	4.23634	1.53121	1.73537	1.78641	1.27601	0.791124	1.07185	1.63329	1.63329	1.27601	1.22497	0.689044	0.969765	1.17393	0.280721	3.87906	1.27601	0.663524	0.510403	0.178641	2.93482	1.68433	1.83745	1.81193	1.02081	0.510403	0.510403	1.73537	1.45465	0.510403	0.816644	0.918725	0.408322	0.484883	0.408322	0.488711
RCSOM-A123.31	Puma_concolor	4.4008	1.08784	2.24985	1.82955	1.13729	0.81588	1.03839	1.80482	1.65648	1.13729	1.21146	0.54392	0.939498	1.16201	0.346131	3.9805	1.33508	0.642814	0.519196	0.13598	3.53548	1.92844	2.10151	1.7801	1.06312	0.469749	0.469749	1.92844	1.43397	0.494472	0.89005	0.865327	0.395578	0.469749	0.420302	0.524141
BMNH-1858.5.4.56	Puma_concolor	4.30886	1.49873	1.68608	1.87342	1.17089	0.843038	0.983544	1.70949	1.61582	1.14747	1.14747	0.60886	1.07721	1.21772	0.421519	3.95759	1.31139	0.60886	0.51519	0.222468	2.92721	1.66266	1.75633	1.82658	1.1943	0.51519	0.491772	1.66266	1.33481	0.491772	0.772784	0.866455	0.374683	0.398101	0.421519	0.524557
BMNH-1850.11.22.46	Puma_concolor	4.29183	1.38212	1.72158	1.84282	1.26088	0.897163	1.0669	1.60034	1.67309	1.21238	1.16389	0.533448	1.0184	1.16389	0.363715	3.83113	1.28513	0.606191	0.460705	0.212167	3.1037	1.74583	1.91556	1.64884	1.0184	0.484953	0.484953	1.86707	1.50335	0.509201	0.800172	0.897163	0.387962	0.460705	0.484953	0.476466
BMNH-1901.11.14.1	Puma_concolor	4.33603	1.39935	1.57674	1.99063	1.24168	0.886915	0.886915	1.57674	1.55703	1.24168	1.22197	0.591277	1.04459	1.18255	0.433603	4.02068	1.37965	0.630695	0.532149	0.177383	2.93667	1.65557	1.79354	1.85267	1.16284	0.51244	0.49273	1.79354	1.45848	0.49273	0.906624	0.847496	0.354766	0.413894	0.394184	0.507512
BMNH-11.8.21.1	Puma_concolor	4.36068	1.51845	1.53792	1.88833	1.20697	0.876029	0.914964	1.63525	1.47952	1.22644	1.18751	0.661889	0.934431	1.22644	0.467216	3.9324	1.30431	0.642421	0.50615	0.155739	3.05637	1.67419	1.82993	1.82993	1.0707	0.525618	0.486683	1.79099	1.44058	0.50615	0.895497	0.895497	0.428281	0.447748	0.389346	0.451642
BMNH-1901.3.21.15	Puma_concolor	4.34906	1.47868	1.60915	1.82661	1.19599	0.869813	0.956794	1.67439	1.56566	1.17425	1.13076	0.630614	1.02203	1.21774	0.413161	4.00114	1.3917	0.652359	0.500142	0.195708	2.91387	1.60915	1.71788	1.82661	1.10901	0.521888	0.456652	1.80486	1.3917	0.478397	0.869813	0.869813	0.413161	0.456652	0.413161	0.480571
BMNH-1926.12.4.100	Puma_concolor	4.43771	1.53782	1.75751	1.77948	1.09844	0.856786	0.988599	1.58176	1.58176	1.20829	1.16435	0.615128	0.922693	1.18632	0.351502	3.99833	1.36207	0.637097	0.483315	0.186735	2.94383	1.58176	1.71357	1.75751	1.14238	0.527253	0.439377	1.84539	1.49388	0.527253	0.834817	0.900724	0.439377	0.505284	0.461346	0.464642
BMNH-1926.1.12.3	Puma_concolor	4.30575	1.48474	1.78169	1.83118	1.18779	0.767117	0.940336	1.55898	1.70745	1.18779	1.11356	0.569151	0.915591	1.18779	0.296948	3.86033	1.26203	0.618642	0.51966	0.197966	2.84575	1.68271	1.78169	1.7322	1.08881	0.544405	0.445423	1.78169	1.50949	0.544405	0.866099	0.965082	0.470168	0.544405	0.445423	0.512236
BMNH-52.1084.a	Puma_concolor	4.46724	1.5508	1.898	1.8517	1.13417	0.810121	0.833267	1.62024	1.62024	1.20361	1.20361	0.601804	1.06473	1.22675	0.300902	3.93487	1.31934	0.648097	0.509219	0.138878	3.1479	1.73597	1.82856	1.73597	1.04158	0.486073	0.462926	1.898	1.50451	0.532365	0.810121	0.902706	0.462926	0.462926	0.462926	0.558983
BMNH-40.692	Puma_concolor	4.37492	1.57924	1.72863	1.81399	1.23778	0.917667	0.896326	1.5579	1.53656	1.1951	1.15242	0.661574	0.960349	1.21644	0.426822	3.90542	1.30181	0.618892	0.448163	0.19207	2.85971	1.68595	1.74997	1.77131	1.15242	0.469504	0.490845	1.81399	1.42985	0.512186	0.810961	0.853644	0.426822	0.448163	0.426822	0.516454
HM-NH.35.94	Puma_yagouaroundi	4.38328	1.83382	1.87855	1.43128	1.16291	0.760365	1.38655	1.968	2.01273	1.07346	1.02873	0.447274	0.715638	0.939275	0.313092	4.15965	1.43128	0.581456	0.492001	0.205746	2.81783	1.61019	1.65491	1.61019	0.894548	0.447274	0.402546	2.01273	1.38655	0.447274	0.894548	1.11818	0.447274	0.715638	0.626183	0.536729
BMNH-1908.6.17.11	Puma_yagouaroundi	4.35593	1.70089	1.82534	1.49346	1.03713	0.705245	1.24455	1.82534	1.90831	1.03713	0.995641	0.539305	0.746731	0.954156	0.290395	4.18999	1.61792	0.58079	0.456335	0.24891	2.82098	1.6594	1.78386	1.70089	0.954156	0.456335	0.456335	1.70089	1.41049	0.456335	0.954156	1.07861	0.456335	0.622275	0.622275	0.539305
BMNH-1934.9.2.33	Puma_yagouaroundi	4.35375	1.64292	1.97151	1.51971	1.10897	0.821462	1.27327	1.84829	1.84829	1.10897	0.985755	0.492877	0.821462	0.944682	0.328585	4.14838	1.684	0.616097	0.451804	0.246439	2.7519	1.60185	1.76614	1.684	0.903609	0.492877	0.451804	1.64292	1.39649	0.451804	0.944682	1.0679	0.492877	0.575024	0.492877	0.464126
BMNH-1934.9.2.32	Puma_yagouaroundi	4.34843	1.46341	2.00697	1.50522	1.04529	0.794424	1.17073	1.88153	1.83972	1.04529	0.961671	0.543553	0.878048	1.04529	0.292683	4.09756	1.58885	0.585365	0.45993	0.209059	2.80139	1.67247	1.79791	1.67247	0.961671	0.501741	0.45993	1.71428	1.33798	0.501741	0.919859	1.00348	0.501741	0.627177	0.543553	0.505923
BMNH-1926.1.12.8	Puma_yagouaroundi	4.37671	1.87573	1.87573	1.38447	1.07185	0.759225	1.42913	1.87573	2.05437	1.02719	0.937866	0.535924	0.759225	0.982527	0.267962	4.15341	1.65243	0.580584	0.446603	0.223301	2.72428	1.60777	1.69709	1.60777	0.893206	0.491263	0.491263	1.69709	1.38447	0.446603	0.893206	1.07185	0.535924	0.625244	0.580584	0.506894
BMNH-1926.1.12.7	Puma_yagouaroundi	4.24595	1.84606	1.75376	1.38455	1.10764	0.784577	1.3384	1.84606	1.93837	0.969184	0.923032	0.507668	0.784577	0.923032	0.323061	4.10749	1.61531	0.599971	0.507668	0.230758	2.72294	1.70761	1.79991	1.66146	0.923032	0.507668	0.507668	1.70761	1.4307	0.323061	0.830729	1.06149	0.553819	0.646122	0.553819	0.558434
BMNH-1923.8.9.8	Puma_yagouaroundi	4.35071	1.73141	1.7758	1.59822	1.15427	0.754716	1.33185	1.90899	1.86459	1.06548	1.02109	0.53274	0.932296	1.06548	0.221975	3.99555	1.55383	0.62153	0.488345	0.17758	2.7081	1.64262	1.7758	1.64262	0.932296	0.488345	0.488345	1.7758	1.37625	0.35516	0.932296	1.06548	0.577135	0.62153	0.53274	0.557158
BMNH-1886.1.19.1	Puma_yagouaroundi	4.38042	1.81113	1.76901	1.43206	1.0951	0.758149	1.34782	1.97961	1.89537	1.01087	0.968746	0.505433	0.842388	1.01087	0.294836	4.16982	1.55842	0.547552	0.463313	0.210597	2.69564	1.5163	1.60054	1.68478	1.01087	0.463313	0.463313	1.72689	1.47418	0.463313	0.884507	1.0951	0.547552	0.631791	0.589671	0.492797
BMNH-1926.1.8.9	Puma_yagouaroundi	4.46144	1.7685	1.84888	1.52734	1.1656	0.763669	1.24599	1.80869	1.84888	1.08521	1.00483	0.522511	0.763669	0.964635	0.241159	4.22028	1.52734	0.602897	0.522511	0.200966	2.73313	1.68811	1.7685	1.7685	1.00483	0.482317	0.522511	1.7283	1.44695	0.482317	0.844056	1.00483	0.442124	0.602897	0.522511	0.562704
MS.Jaguarundi	Puma_yagouaroundi	4.61561	1.79496	1.88043	1.4958	1.06843	0.769268	1.28211	1.92317	1.96591	1.02569	0.982953	0.555582	0.854742	0.940216	0.29916	4.31645	1.62401	0.598319	0.427371	0.243601	2.9916	1.66675	1.70948	1.70948	0.940216	0.512845	0.512845	1.75222	1.36759	0.427371	0.854742	0.982953	0.598319	0.470108	0.427371	0.491477
UoP-Jaguar	Anomalous_Jaguar	4.67196	1.42027	1.9996	1.94353	1.19602	0.822264	0.803576	1.13996	1.42027	1.27077	1.30815	0.579323	1.02783	1.21471	0.42982	4.16738	1.27077	0.672762	0.560635	0.205566	3.02743	1.64453	1.81272	1.94353	1.15865	0.373756	0.411132	1.88747	1.43896	0.467196	0.840952	0.897016	0.392444	0.467196	0.485883	0.536341
UoP-Tiger	Peruvian_Tiger	4.52624	1.39109	1.80634	1.82711	1.20423	0.809741	0.892791	1.18347	1.55719	1.22499	1.20423	0.581352	0.913554	1.12118	0.477539	4.00718	1.22499	0.64364	0.519065	0.23877	2.98981	1.66101	1.78558	1.8894	1.07965	0.415252	0.436014	1.91016	1.41186	0.519065	0.809741	0.975841	0.373727	0.539827	0.477539	0.523217

## Sheet: standardised_data_mandibular
Standardised mandibular measurements of 303 specimens (excluding missing values): each raw value was divided by the geometric mean of that specimen
Specimen	Taxa	L_Sym	L_Mand	L_Diast	L_m1	D_MdM1	D_MdP4	R_T1	R_T2	L_CorProc	R_M1	R_M2	D_AngProc	D_Cond
BMNH-1926.6.4.4	Acinonyx_jubatus	1.30027	4.89512	0.229459	0.73618	0.936957	0.917835	1.52973	1.83567	0.764863	1.12817	2.54317	0.458918	0.382431
BMNH-1926.6.4.5	Acinonyx_jubatus	1.22202	4.88807	0.277731	0.69618	0.925771	0.870224	1.57381	1.81451	0.833194	1.09241	2.61067	0.407339	0.388824
BMNH-1931.1.3.3	Acinonyx_jubatus	1.29786	4.94808	0.223069	0.742212	0.912555	0.912555	1.58176	1.84539	0.750323	1.11535	2.55516	0.40558	0.446138
BMNH-1931.1.2.9	Acinonyx_jubatus	1.17943	5.10328	0.272175	0.721264	0.90725	0.861888	1.63305	1.90523	0.748481	1.11138	2.5403	0.3629	0.453625
BMNH-1942.60	Acinonyx_jubatus	1.17142	4.91995	0.187427	0.770792	0.890277	0.890277	1.63998	1.94455	0.796563	1.17142	2.57712	0.468567	0.42171
BMNH-1935.2.3.1	Acinonyx_jubatus	1.17031	5.06461	0.221955	0.671919	0.907999	0.887821	1.53351	1.77564	0.786932	1.23084	2.58275	0.464088	0.44391
BMNH-1905.8.13.1	Acinonyx_jubatus	1.24031	4.6694	0.291837	0.643866	0.857272	0.820792	1.53215	1.76926	0.766073	1.16735	2.49886	0.492475	0.437756
BMNH-39.536	Acinonyx_jubatus	1.36182	4.68855	0.194546	0.713982	1.01164	0.953273	1.53691	1.78982	0.797637	1.16727	2.41237	0.486364	0.389091
BMNH-43.56	Acinonyx_jubatus	1.36211	4.98708	0.219695	0.779918	1.03257	1.0106	1.49393	1.8015	0.681056	1.14242	2.26286	0.439391	0.395452
RCSOM-A125.21	Caracal_aurata	1.2774	4.75475	0.496765	0.809018	0.887081	0.780631	1.45481	1.73868	0.780631	1.0645	2.23544	0.354832	0.354832
RCSOM-A125.23	Caracal_aurata	1.21391	4.68704	0.472076	0.775553	0.842992	0.741833	1.41623	1.61855	0.708114	1.18019	2.25922	0.438356	0.404636
BMNH-25.10.7.13	Caracal_aurata	1.22953	4.63868	0.447102	0.704186	0.894204	0.810372	1.45308	1.62074	0.698597	1.17364	2.68261	0.530934	0.279439
BMNH-1938.3.29.1	Caracal_aurata	1.20305	4.55069	0.523067	0.643373	0.889215	0.810754	1.46459	1.67382	0.784601	1.04613	2.17073	0.549221	0.31384
RCSOM-A121.1	Caracal_caracal	1.15801	4.69639	0.386005	0.76236	0.932845	0.868511	1.44752	1.64052	0.836344	0.997179	2.09086	0.482506	0.386005
RCSOM-A121.11	Caracal_caracal	1.13073	4.72247	0.266054	0.728324	0.864677	0.83142	1.59633	1.66284	0.798163	1.16399	2.16169	0.631879	0.399082
RCSOM-A121.12	Caracal_caracal	1.17564	4.76443	0.371254	0.66207	0.928135	0.866259	1.45408	1.67064	0.773446	1.02095	2.19659	0.495005	0.43313
RCSOM-A121.13	Caracal_caracal	1.16739	4.39042	0.40605	0.609075	0.862856	0.8121	1.47193	1.67496	0.837478	1.11664	2.46168	0.558319	0.355294
RCSOM-A121.2	Caracal_caracal	1.33774	4.99891	0.211221	0.866008	0.915293	0.915293	1.51375	1.76018	0.739275	1.12651	2.46425	0.422443	0.422443
RCSOM-A121.3	Caracal_caracal	1.00197	4.57567	0.400788	0.744798	0.868375	0.801577	1.33596	1.60315	0.868375	1.16897	2.40473	0.500985	0.400788
RCSOM-A121.22	Caracal_caracal	1.23667	4.79208	0.309167	0.842479	0.9275	0.9275	1.4299	1.62313	0.850208	1.12073	2.2801	0.386458	0.386458
RCSOM-A121.21	Caracal_caracal	1.19525	4.88645	0.421852	0.759333	0.914012	0.843703	1.40617	1.65225	0.73824	1.05463	2.4608	0.49216	0.316389
RCSOM-A120.21	Felis_chaus	1.19859	4.97063	0.352527	0.719155	0.951823	0.846065	1.51587	1.65688	0.705054	1.12809	2.15041	0.493538	0.38778
BMNH-19.7.7.3494	Felis_chaus	1.29483	5.04986	0.582676	0.738056	0.938755	0.874014	1.39195	1.65091	0.647417	1.06824	2.16885	0.485563	0.258967
BMNH-92.5.22.1	Felis_chaus	1.29262	4.95504	0.430873	0.725303	0.861746	0.861746	1.36443	1.65168	0.789934	1.00537	2.08255	0.502685	0.359061
BMNH-1909.7.1.15	Felis_chaus	1.16103	4.78925	0.522463	0.595028	0.870772	0.841747	1.36421	1.65447	0.754669	1.16103	1.97375	0.580515	0.348309
BMNH-1934.12.11.4	Felis_chaus	1.27744	4.95768	0.517059	0.663052	0.912457	0.790796	1.33827	1.64242	0.69955	1.12536	2.09865	0.577889	0.304152
BMNH-77.858	Felis_chaus	1.25904	5.03614	0.566566	0.642108	0.944277	0.881325	1.38494	1.63675	0.723945	1.0387	2.20331	0.440662	0.314759
BMNH-32.2.1.76	Felis_chaus	1.2469	4.95641	0.592276	0.713848	0.904	0.810483	1.40276	1.65214	0.748138	1.05986	2.1509	0.529931	0.249379
BMNH-1936.4.14.35	Felis_chaus	1.38598	4.96643	0.461993	0.68144	0.895112	0.808488	1.44373	1.7036	0.664115	1.15498	2.25222	0.433119	0.346495
BMNH-8.1.13.4	Felis_chaus	1.25459	5.09215	0.627294	0.756443	0.922492	0.848692	1.40219	1.62359	0.664194	1.03319	2.25088	0.405896	0.295197
BMNH-4.6.1.1	Felis_chaus	1.29508	5.02796	0.571359	0.777048	0.914174	0.837993	1.44744	1.67599	0.68563	0.990355	2.36162	0.380906	0.304725
BMNH-22.5.16.27	Felis_chaus	1.33034	5.09964	0.517355	0.742774	0.923848	0.812986	1.4412	1.69988	0.702124	1.07166	2.25419	0.369539	0.332585
BMNH-29.10.19.1	Felis_chaus	1.32059	4.85318	0.660297	0.640488	0.858386	0.792356	1.32059	1.45265	0.726327	1.05648	2.11295	0.528238	0.330148
BMNH-25.6.10.12	Felis_chaus	1.1554	4.82547	0.61168	0.645662	0.883538	0.815573	1.56318	1.73309	0.781591	1.01947	2.1069	0.407787	0.339822
BMNH-12.6.28.11	Felis_chaus	1.33388	4.94319	0.47078	0.788557	0.863097	0.784634	1.45157	1.68696	0.70617	1.02002	2.31467	0.47078	0.313854
BMNH-32.2.1.39	Felis_chaus	1.3852	5.07907	0.53869	0.827274	0.923468	0.846512	1.34672	1.53911	0.654123	1.00042	2.30867	0.423256	0.307823
BMNH-32.2.1.64	Felis_chaus	1.20501	5.30207	0.723009	0.755143	0.883678	0.84351	1.52635	1.68702	0.602507	0.964012	2.49036	0.321337	0.321337
BMNH-32.2.1.59	Felis_chaus	1.36973	4.8283	0.650622	0.599257	0.924568	0.856081	1.40397	1.57519	0.650622	0.993054	2.08884	0.479405	0.342432
BMNH-14.8.22.17	Felis_chaus	1.23067	4.69193	0.615335	0.692252	0.923003	0.846086	1.34605	1.65371	0.692252	0.99992	2.30751	0.423043	0.346126
BMNH-14.7.19.86	Felis_chaus	1.20707	5.00581	0.532533	0.724245	0.923057	0.781048	1.42009	1.6331	0.710044	1.06507	2.80467	0.426026	0.284018
BMNH-1934.3.24.14	Felis_chaus	1.1669	4.70191	0.514807	0.700138	0.858012	0.755051	1.44146	1.6817	0.789371	1.02961	2.40243	0.480487	0.343205
BMNH-67.1429	Felis_margarita	1.21742	4.91649	0.463555	0.674262	0.913063	0.861556	1.31106	1.63883	0.688309	1.07695	2.43483	0.505696	0.346496
BMNH-59.634	Felis_margarita	1.09239	4.57962	0.474768	0.630222	0.924326	0.840296	1.51253	1.84865	0.722655	1.1344	2.22679	0.466365	0.361327
BMNH-2.12.1.5	Felis_nigripes	1.15419	4.72169	0.666283	0.676775	0.849904	0.765963	1.36404	1.67882	0.65579	1.15419	2.36084	0.388228	0.393474
BMNH-39.679	Felis_nigripes	1.12947	4.74378	0.643798	0.74545	0.847103	0.784982	1.35536	1.58126	0.559088	1.12947	2.31541	0.434846	0.429199
BMNH-2.12.1.4	Felis_nigripes	1.25844	4.56185	0.566299	0.70263	0.886152	0.812743	1.31088	1.62549	0.681656	1.15357	2.25471	0.40375	0.398506
BCMAG-Af1371	Felis_silvestris	1.27025	5.08101	0.580687	0.648736	0.861957	0.784835	1.37913	1.54245	0.816591	1.02981	2.45885	0.417369	0.331173
BCMAG-Af1374	Felis_silvestris	1.34121	5.09257	0.504215	0.72607	0.897503	0.836997	1.4118	1.63366	0.660522	1.02356	2.33956	0.413456	0.352951
BCMAG-Af1382	Felis_silvestris	1.14995	5.03835	0.565231	0.716284	0.901445	0.896573	1.37409	1.53489	0.779628	1.11584	2.37787	0.326469	0.370323
BCMAG-Af1386	Felis_silvestris	1.18912	5.08078	0.562128	0.718876	0.821572	0.816167	1.32424	1.47559	0.789142	1.08642	2.38364	0.416191	0.367545
BRSUVA-Cat-CHAIRO	Felis_silvestris	1.20621	4.94547	0.643313	0.603106	0.936825	0.892597	1.36704	1.56808	0.643313	1.08559	2.37222	0.402071	0.361864
BRSUVA-T.1.543	Felis_silvestris	1.16206	4.85575	0.543678	0.659884	0.975301	0.913048	1.41107	1.66009	0.664035	0.996052	2.19961	0.435773	0.373519
BCMAG-Ab4598	Felis_silvestris	1.35107	4.64928	0.453006	0.651693	0.874223	0.794748	1.43055	1.54976	0.794748	1.07291	2.22529	0.504665	0.365584
BCMAG-Ab4631	Felis_silvestris	1.24122	5.12504	0.628618	0.696685	0.90489	0.844831	1.48946	1.56954	0.680669	1.07706	2.20217	0.388382	0.320315
BCMAG-Af1372	Felis_silvestris	1.21513	4.90391	0.559827	0.616244	0.911347	0.837571	1.44948	1.82269	0.737757	0.954744	2.43026	0.377558	0.373218
RCSOM-G16.24	Felis_silvestris	1.18474	4.42304	0.513389	0.612118	0.868812	0.789829	1.34271	1.54017	0.710846	1.18474	2.17203	0.592372	0.394915
RCSOM-A120.1	Felis_silvestris	1.24833	4.99331	0.579581	0.771288	0.936246	0.891662	1.51583	1.69416	0.668747	1.06999	2.45207	0.356665	0.267499
RCSOM-A120.12	Felis_silvestris	1.15255	4.69887	0.487618	0.691531	0.886578	0.797921	1.41853	1.59584	0.620605	1.15255	2.17212	0.620605	0.354631
RCSOM-A120.13	Felis_silvestris	1.21914	4.60986	0.457176	0.670525	0.876254	0.811487	1.44772	1.60012	0.76196	1.06674	2.13349	0.533372	0.38098
RCSOM-G70.5	Felis_silvestris	1.17689	4.58986	0.509984	0.674748	0.941509	0.86305	1.41226	1.64764	0.627673	1.13766	2.15763	0.588443	0.313836
BCMAG-Af926	Felis_silvestris	1.23406	4.56601	0.411352	0.666391	0.839159	0.818591	1.522	1.60427	0.822704	1.11065	2.0979	0.575893	0.349649
BCMAG-Ab2797	Felis_silvestris	1.18411	4.73644	0.434174	0.635473	0.828877	0.777566	1.42093	1.57881	0.710466	1.18411	2.1314	0.631526	0.394704
BCMAG-Ab4630	Felis_silvestris	1.25239	4.71732	0.521827	0.680463	0.918416	0.834923	1.33588	1.54461	0.667939	1.16889	2.12905	0.5427	0.333969
BCMAG-Ab4629	Felis_silvestris	1.26304	4.5321	0.520077	0.624092	0.910134	0.798689	1.41164	1.56023	0.66867	1.11445	2.04316	0.594373	0.371483
BCMAG-Ab1536	Felis_silvestris	1.34462	4.59412	0.485557	0.612549	0.933763	0.859062	1.49402	1.64342	0.67231	1.12052	2.05428	0.597609	0.298804
BMNH-1901.11.18.1	Leopardus_colocolo	1.4402	4.53662	0.504069	0.619285	0.936129	0.936129	1.4402	1.72824	0.756104	0.936129	2.26831	0.432059	0.324045
BMNH-1901.12.27.1	Leopardus_colocolo	1.42802	4.8394	0.396672	0.729876	0.952013	0.952013	1.46769	1.70569	0.714009	0.952013	2.34036	0.436339	0.317338
BMNH-1927.11.1.67	Leopardus_colocolo	1.34615	4.62179	0.403846	0.76282	0.987179	0.987179	1.34615	1.70513	0.807692	1.07692	2.3782	0.358974	0.314102
BMNH-1908.4.13.1	Leopardus_colocolo	1.41238	4.68317	0.37168	0.706192	0.966368	0.966368	1.56106	1.7469	0.817696	1.00354	2.26725	0.408848	0.297344
BMNH-1921.6.7.3	Leopardus_colocolo	1.37268	4.65186	0.30504	0.785479	0.991381	0.915121	1.44894	1.79211	0.724471	1.02951	2.32593	0.41943	0.3813
RCSOM-G16.3	Leopardus_geoffroyi	1.31555	4.77984	0.570073	0.706013	0.877035	0.789331	1.40326	1.66637	0.613924	1.05244	2.4557	0.438517	0.350814
BMNH-1913.8.14.1	Leopardus_geoffroyi	1.36993	4.46858	0.456643	0.681702	0.968735	0.923071	1.36993	1.63087	0.652347	0.97852	2.51154	0.456643	0.358791
BMNH-1917.1.25.2	Leopardus_geoffroyi	1.38438	4.69151	0.30764	0.73449	0.922919	0.834473	1.46129	1.61511	0.692189	1.11519	2.34575	0.53837	0.38455
BMNH-1909.12.1.9	Leopardus_geoffroyi	1.33915	4.6518	0.493372	0.701293	0.969124	0.852829	1.37439	1.62108	0.634336	1.02199	2.60782	0.422891	0.352409
BMNH-12.11.15.1	Leopardus_geoffroyi	1.3127	4.92261	0.410218	0.787618	0.984523	0.902479	1.35372	1.64087	0.656349	1.06657	2.54335	0.369196	0.369196
BMNH-1909.12.1.8	Leopardus_geoffroyi	1.33489	4.5316	0.421544	0.656906	0.930909	0.857139	1.4754	1.75643	0.632316	1.08899	2.17798	0.456672	0.421544
BMNH-1921.4.8.1	Leopardus_geoffroyi	1.36826	5.03324	0.371384	0.908915	0.943121	0.864935	1.46599	1.71032	0.635263	1.02619	2.34559	0.390931	0.351838
BMNH-1917.1.25.3	Leopardus_geoffroyi	1.37537	4.9055	0.444704	0.806886	0.916916	0.857317	1.28368	1.74214	0.687687	1.00861	2.29229	0.408028	0.362182
BMNH-1837.5.13.94	Leopardus_geoffroyi	1.3274	4.6459	0.349315	0.691645	0.90822	0.873289	1.46713	1.53699	0.768494	1.11781	2.23562	0.548425	0.356302
BMNH-1903.7.9.1	Leopardus_guigna	1.33603	5.0358	0.513857	0.688568	0.924942	0.822171	1.54157	1.64434	0.616628	1.13048	2.46651	0.411085	0.308314
BMNH-1905.2.4.1	Leopardus_guigna	1.41801	4.9124	0.506433	0.663427	0.911579	0.860936	1.46866	1.72187	0.60772	1.11415	2.58281	0.405146	0.30386
BCMAG-Ab2160	Leopardus_pardalis	1.37907	4.85808	0.401184	0.636252	0.965348	0.865052	1.47936	1.61414	0.783562	1.00609	2.62963	0.37611	0.37611
BCMAG-Af1355	Leopardus_pardalis	1.3853	4.88319	0.387884	0.761916	1.06668	0.938542	1.47188	1.66236	0.623385	1.03898	2.38964	0.346325	0.380958
BCMAG-Af1356	Leopardus_pardalis	1.65648	4.94182	0.378229	0.670873	1.0491	0.993885	1.43561	1.57365	0.690198	1.02149	2.26385	0.386511	0.331295
BCMAG-Af1380	Leopardus_pardalis	1.58563	4.9834	0.412379	0.688267	1.03385	0.958346	1.48979	1.68437	0.580816	0.981579	2.422	0.406571	0.319449
BCMAG-Af1381	Leopardus_pardalis	1.39247	4.68218	0.435147	0.696236	0.995037	0.939918	1.36346	1.59554	0.754255	0.957324	2.72982	0.435147	0.290098
RCSOM-A127.12	Leopardus_pardalis	1.09862	4.87917	0.516998	0.688253	0.840121	0.775496	1.42174	1.68024	0.710872	1.13093	2.22955	0.581622	0.323124
RCSOM-A127.2	Leopardus_pardalis	1.59282	4.87403	0.222995	0.866495	1.01941	0.955693	1.36983	1.56096	0.732698	0.987549	2.29366	0.605272	0.318564
RCSOM-G70.7	Leopardus_pardalis	1.47666	4.52226	0.369164	0.679878	0.953675	0.953675	1.50742	1.63048	0.676801	1.07673	2.27651	0.522983	0.307637
BMNH-1904.12.4.5	Leopardus_pardalis	1.39943	4.54816	0.374848	0.607254	0.974605	0.899636	1.57436	1.74929	0.724706	1.07456	2.62394	0.399838	0.349858
BMNH-1926.12.4.28	Leopardus_pardalis	1.47189	4.83162	0.319975	0.694346	0.927928	0.863933	1.50388	1.59988	0.703945	1.11991	2.46381	0.479963	0.351973
BMNH-1914.4.25.48	Leopardus_pardalis	1.44841	4.43868	0.373784	0.593382	0.981183	0.864375	1.54186	1.70539	0.747568	1.00454	2.38287	0.537314	0.327061
BMNH-1899.8.1.28	Leopardus_pardalis	1.44966	5.00792	0.329469	0.780841	0.988406	0.889565	1.41672	1.58145	0.560097	1.08725	2.56986	0.52715	0.329469
BMNH-1933.6.12.1	Leopardus_pardalis	1.57865	4.73596	0.305546	0.646738	0.967561	0.942099	1.4768	1.57865	0.687478	1.04395	2.39344	0.560167	0.331008
BMNH-1915.2.15.1	Leopardus_pardalis	1.47164	4.83082	0.255937	0.73262	1.02375	0.927772	1.40765	1.59961	0.831796	1.02375	2.36742	0.543867	0.319922
MS-Ocelot	Leopardus_pardalis	1.49058	5.42027	0.396358	0.677534	1.05018	1.05018	1.65996	1.72771	0.677534	0.813041	2.84564	0.30489	0.30489
RCSOM-G70.3	Leopardus_tigrinus	1.1407	5.0761	0.456278	0.827005	0.912557	0.872632	1.42587	1.65401	0.627383	1.08366	2.6236	0.399244	0.342209
BMNH-1903.7.1.11	Leopardus_tigrinus	1.41178	5.0824	0.470593	0.790596	0.894126	0.847067	1.41178	1.64707	0.564711	1.12942	2.35296	0.376474	0.376474
BMNH-63.1211	Leopardus_tigrinus	1.49871	5.24549	0.535254	0.727945	0.963457	0.856406	1.44519	1.60576	0.535254	1.17756	2.62274	0.321152	0.321152
BMNH-1884.2.8.3	Leopardus_tigrinus	1.22245	4.94075	0.422765	0.728379	0.855718	0.804782	1.4262	1.73181	0.713098	1.06965	2.49584	0.407485	0.407485
BMNH-29.6.6.1	Leopardus_tigrinus	1.29327	4.87461	0.49741	0.756063	0.895337	0.860519	1.49223	1.69119	0.547151	1.0943	2.28808	0.397928	0.397928
BMNH-1898.7.1.2	Leopardus_tigrinus	1.34727	4.95601	0.481166	0.760243	0.914216	0.866099	1.39538	1.53973	0.481166	1.1548	2.5983	0.384933	0.43305
BMNH-98.3.2.16	Leopardus_wiedii	1.48509	4.84839	0.436792	0.655188	0.960942	0.873584	1.39773	1.48509	0.742546	1.00462	2.44604	0.436792	0.349434
BMNH-1855.12.26.175	Leopardus_wiedii	1.34474	4.88587	0.537894	0.685815	0.89649	0.838218	1.25509	1.43438	0.627543	1.07579	2.555	0.49307	0.358596
BMNH-1858.5.4.71	Leopardus_wiedii	1.40418	4.95595	0.495595	0.689702	0.86729	0.850771	1.40418	1.61068	0.578194	0.991189	2.47797	0.536894	0.330396
BMNH-1914.5.28.9	Leopardus_wiedii	1.3528	4.97354	0.397883	0.748021	0.895237	0.81964	1.39259	1.59153	0.636613	1.07428	2.62603	0.47746	0.358095
BMNH-1908.6.17.9	Leopardus_wiedii	1.29546	4.69603	0.445314	0.71655	0.927062	0.858241	1.29546	1.45739	0.647729	1.13353	2.59092	0.445314	0.40483
BMNH-26.1.12.5	Leopardus_wiedii	1.24641	4.86098	0.498562	0.697987	0.884948	0.814318	1.41259	1.45414	0.706297	1.08022	2.53436	0.498562	0.332375
BMNH-1922.5.29.3	Leopardus_wiedii	1.47699	5.16946	0.393863	0.753264	0.910809	0.82219	1.37852	1.67392	0.590795	1.13236	2.46165	0.393863	0.393863
BMNH-1913.12.18.2	Leopardus_wiedii	1.31426	5.02237	0.375504	0.70407	0.957535	0.905903	1.50202	1.59589	0.657132	1.12651	2.3469	0.422442	0.375504
RCSOM-A124.31	Leptailurus_serval	1.14022	5.13101	0.498848	0.698388	0.855169	0.855169	1.53218	1.60344	0.641376	1.10459	2.52987	0.53448	0.285056
RCSOM-A124.3	Leptailurus_serval	1.24694	4.92214	0.393771	0.708788	0.918799	0.85317	1.44383	1.50945	0.689099	1.08287	2.36263	0.590656	0.328142
RCSOM-A124.2	Leptailurus_serval	1.06286	4.94894	0.398572	0.697502	0.896788	0.797145	1.52786	1.52786	0.730716	1.06286	2.65715	0.498215	0.398572
RCSOM-A124.12	Leptailurus_serval	1.36941	4.75688	0.36037	0.684703	1.00904	0.900925	1.51355	1.6577	0.72074	1.08111	2.45052	0.396407	0.36037
RCSOM-A124.11	Leptailurus_serval	1.18415	4.92356	0.498588	0.641932	0.872529	0.841367	1.49576	1.58925	0.654397	0.997176	2.5241	0.498588	0.373941
RCSOM-A124.1	Leptailurus_serval	1.32484	5.06751	0.496814	0.649171	0.927387	0.861145	1.55669	1.58981	0.629298	0.960508	2.51719	0.463693	0.33121
RCSOM-G80.11	Leptailurus_serval	1.14723	4.70365	0.372851	0.639582	0.917786	0.831743	1.43404	1.60613	0.803063	1.11855	2.26578	0.630978	0.34417
BMNH-99.10.23.3	Leptailurus_serval	1.14681	4.73815	0.482869	0.691106	0.905378	0.784661	1.47878	1.78058	0.694123	1.11663	2.23327	0.513048	0.331972
BMNH-50.2042	Leptailurus_serval	1.20567	4.70209	0.421983	0.551592	0.904249	0.783682	1.4468	1.59751	0.753541	1.26595	2.47161	0.542549	0.3617
BMNH-9.11.2.4	Leptailurus_serval	1.30438	5.07257	0.362327	0.779002	0.869584	0.869584	1.558	1.81163	0.652188	1.12321	2.60875	0.362327	0.362327
BMNH-9.11.2.5	Leptailurus_serval	1.22654	4.66766	0.408846	0.688224	0.953973	0.919903	1.46503	1.66945	0.68141	1.02211	2.38493	0.511057	0.340705
BMNH-11.1.12.1	Leptailurus_serval	1.00563	4.62588	0.40225	0.61008	0.871543	0.804501	1.50844	1.67604	0.871543	1.10619	2.71519	0.469292	0.40225
BMNH-1937.2.24.27	Leptailurus_serval	1.22101	4.70088	0.549454	0.622714	0.915757	0.854706	1.46521	1.58731	0.671555	1.03786	2.53359	0.518929	0.305252
BMNH-66.36	Leptailurus_serval	1.14091	4.62701	0.443686	0.62116	0.950755	0.887372	1.45782	1.52121	0.760604	1.10921	2.40858	0.570453	0.316918
BMNH-70.679	Leptailurus_serval	1.1571	4.90068	0.40839	0.667037	0.850812	0.81678	1.42936	1.66759	0.748715	1.08904	2.58647	0.54452	0.340325
RCSOM-A122.2	Lynx_canadensis	1.34748	4.74679	0.489992	0.762549	0.979983	0.918734	1.43935	1.59247	0.673738	1.01061	2.20496	0.367494	0.367494
RCSOM-A122.3	Lynx_canadensis	1.35121	4.87612	0.499362	0.737293	0.969349	0.851852	1.43934	1.52746	0.704981	0.939975	2.34994	0.381865	0.381865
RCSOM-G16.32	Lynx_canadensis	1.36641	4.83937	0.597805	0.705979	0.967874	0.910941	1.48028	1.50875	0.711672	0.910941	2.22042	0.37007	0.341603
BMNH-62.12.12.29	Lynx_canadensis	1.25478	4.89364	0.501912	0.77169	0.963044	0.878346	1.47437	1.56847	0.658759	0.941085	2.2586	0.407803	0.376434
BMNH-63.2.24.40	Lynx_canadensis	1.32792	4.85898	0.42252	0.763555	0.965761	0.875221	1.47882	1.59954	0.633781	1.02612	2.4144	0.42252	0.36216
BMNH-1.6.29.1	Lynx_canadensis	1.27183	4.65374	0.462484	0.768879	0.982777	0.896062	1.38745	1.56088	0.635915	1.06949	2.28351	0.462484	0.346863
BMNH-92.4.19.1	Lynx_canadensis	1.22892	4.83189	0.41895	0.742938	0.949621	0.8379	1.48029	1.56408	0.64239	1.08927	2.40198	0.44688	0.39102
BMNH-85.804	Lynx_canadensis	1.3211	4.89406	0.480398	0.744618	0.993824	0.954792	1.41117	1.62134	0.660548	0.990822	2.19182	0.420349	0.330274
BCMAG-Ab4458	Lynx_canadensis	1.25207	4.85924	0.536603	0.71547	0.924149	0.834715	1.49056	1.55019	0.685659	0.983772	2.3849	0.417358	0.357735
RCSOM-A122.1	Lynx_lynx	1.34563	4.76144	0.491671	0.701278	0.957464	0.931587	1.29387	1.55264	0.724567	1.00922	2.30309	0.414039	0.362284
RCSOM-A122.11	Lynx_lynx	1.48151	4.8434	0.341887	0.871812	1.02566	0.96868	1.45302	1.68095	0.712265	0.883209	2.45019	0.313397	0.398868
BMNH-83.4.21.1	Lynx_lynx	1.46618	4.72437	0.434424	0.811831	0.977455	0.923152	1.41188	1.62909	0.814546	0.923152	2.28073	0.35297	0.325818
BMNH-85.803	Lynx_lynx	1.52873	4.5568	0.323386	0.887842	0.940759	0.911361	1.29354	1.58753	0.852563	1.02896	2.05791	0.382184	0.411582
BMNH-98.8.5.1	Lynx_lynx	1.41767	4.7087	0.506312	0.729089	0.936676	0.911361	1.41767	1.6202	0.708836	0.987308	2.35435	0.354418	0.354418
BMNH-1230c	Lynx_lynx	1.44084	4.54611	0.34779	0.76017	0.993686	0.894318	1.39116	1.63958	0.745265	1.01853	2.5339	0.372632	0.397474
BMNH-55.12.26.176	Lynx_lynx	1.45073	4.61814	0.38686	0.780974	0.96715	0.942972	1.35401	1.64416	0.725363	0.991329	2.29698	0.435218	0.338503
BMNH-69.10.19.16	Lynx_lynx	1.41069	4.65005	0.444106	0.833352	0.992708	0.94046	1.38457	1.64581	0.731469	0.966584	2.08991	0.417982	0.313487
BMNH-95.9.4.1	Lynx_pardinus	1.33335	4.90916	0.424248	0.775768	0.969711	0.939407	1.45457	1.63639	0.848497	1.03032	2.42428	0.333338	0.303035
BMNH-55.12.26.179	Lynx_pardinus	1.24069	4.57874	0.472644	0.590805	0.915747	0.856667	1.53609	1.74287	0.768046	1.06345	2.39276	0.472644	0.324943
BMNH-4.12.12.1	Lynx_pardinus	1.33785	4.79881	0.378088	0.747452	0.930679	0.872512	1.36693	1.57052	0.814344	1.10518	2.44303	0.494423	0.290837
BMNH-39.3664	Lynx_pardinus	1.28456	4.785	0.417483	0.770738	0.931309	0.899194	1.41302	1.50936	0.802852	1.02765	2.37644	0.449597	0.321141
BMNH-1903.3.16.1	Lynx_pardinus	1.29291	4.8778	0.47015	0.708163	0.910915	0.881531	1.46922	1.58676	0.881531	1.02845	2.32136	0.411381	0.293844
BMNH-19.4.2.1	Lynx_rufus	1.33374	4.61251	0.58351	0.672426	0.889159	0.833586	1.50046	1.58381	0.58351	0.972517	2.55633	0.416793	0.389007
BMNH-1227.a	Lynx_rufus	1.18361	4.67216	0.498364	0.694595	0.903285	0.84099	1.3705	1.55739	0.716399	1.12132	2.46067	0.436069	0.373773
BMNH-43.5.27.5	Lynx_rufus	1.28325	4.71596	0.513301	0.641627	0.866196	0.840531	1.44366	1.60407	0.673708	1.05868	2.59859	0.417057	0.384976
BMNH-94.5.9.2	Lynx_rufus	1.30273	4.52853	0.527294	0.700991	0.93052	0.868485	1.36476	1.58188	0.558312	1.05459	2.48139	0.527294	0.341191
BMNH-82.10.26.10	Lynx_rufus	1.09437	4.48691	0.574544	0.610111	0.902854	0.848136	1.39532	1.66891	0.738699	1.12173	2.73592	0.437747	0.328311
BMNH-88.11.25.1	Lynx_rufus	1.15874	4.46115	0.550402	0.645998	0.926993	0.869056	1.33255	1.65121	0.666276	1.07184	2.31748	0.492465	0.376591
BMNH-57.6.22.6	Lynx_rufus	1.25198	4.81024	0.461255	0.658936	0.955458	0.922511	1.44966	1.64734	0.691883	1.02135	2.6028	0.428309	0.329468
BMNH-13.8.2.1	Lynx_rufus	1.32708	4.81939	0.55877	0.698462	0.908001	0.908001	1.32708	1.57154	0.663539	1.01277	2.58431	0.384154	0.349231
BMNH-1938.11.30.22	Neofelis_diardi	1.50688	4.69645	0.703212	0.685632	0.8539	0.8539	1.40642	1.55711	0.652982	0.954359	2.08452	0.401835	0.351606
BMNH-1938.11.30.24	Neofelis_diardi	1.44568	4.63069	0.519541	0.743169	0.903549	0.926137	1.46827	1.53603	0.813194	0.858371	2.05557	0.451774	0.316242
BMNH-1903.4.9.2	Neofelis_diardi	1.51106	4.73465	0.629607	0.682494	0.906635	0.906635	1.38514	1.48587	0.70516	0.856266	2.2414	0.402949	0.35258
BMNH-30.3.3.5	Neofelis_diardi	1.46474	4.63833	0.634719	0.602983	0.878842	0.878842	1.36709	1.51356	0.781193	1.07414	2.14828	0.390596	0.341772
BMNH-1938.11.30.23	Neofelis_diardi	1.66819	4.9232	0.712033	0.608279	0.854439	0.834096	1.46475	1.56647	0.732377	0.935814	2.2785	0.386532	0.284813
BMNH-39.336	Neofelis_diardi	1.53805	4.58852	0.589586	0.674179	0.897197	0.922831	1.40988	1.53805	0.717757	0.897197	2.25581	0.410147	0.333245
BMNH-55.1644	Neofelis_nebulosa	1.53764	4.67882	0.615056	0.648005	0.922584	0.900618	1.40584	1.60354	0.615056	1.03242	2.28449	0.417359	0.307528
BMNH-43.65	Neofelis_nebulosa	1.34436	4.68359	0.542082	0.650498	0.932381	0.889014	1.38773	1.53951	0.585448	1.14921	2.23338	0.390299	0.433665
BMNH-47.685	Neofelis_nebulosa	1.49075	4.77918	0.635763	0.699339	0.92076	0.92076	1.40306	1.5346	0.569994	0.986529	2.21421	0.372689	0.372689
BMNH-58.6.24.49	Neofelis_nebulosa	1.50601	4.40219	0.559928	0.621713	0.868854	0.830238	1.40947	1.52532	0.772315	1.06193	2.23971	0.463389	0.328234
BMNH-30.3.3.4	Neofelis_nebulosa	1.39606	4.71773	0.601751	0.616193	0.866521	0.866521	1.4442	1.51641	0.770241	1.01094	2.19037	0.433261	0.336981
BMNH-1977.17	Neofelis_nebulosa	1.58131	4.69742	0.5116	0.644151	0.883672	0.883672	1.46504	1.55805	0.744145	1.0232	2.0464	0.395327	0.372073
RCSOM-G16.4	Otocolobus_manul	1.04841	4.3684	0.524207	0.760101	0.873679	0.786311	1.39789	1.57262	0.961047	1.04841	2.35893	0.43684	0.349472
BMNH-79.11.21.540	Otocolobus_manul	1.10932	4.39766	0.423918	0.713133	0.871608	0.871608	1.42627	1.78283	0.911226	1.0697	2.29787	0.412033	0.380338
BMNH-79.526	Otocolobus_manul	1.05603	4.50843	0.511767	0.759528	0.893562	0.893562	1.38096	1.66527	0.893562	1.01541	2.19329	0.438658	0.337117
BCMAG-Aa1894	Panthera_leo	1.48357	4.74744	0.717061	0.59343	0.890144	0.840692	1.45885	1.60721	0.655245	0.976686	2.33663	0.39562	0.321441
BCMAG-Aa4746	Panthera_leo	1.3509	4.71564	0.575383	0.637925	0.888091	0.800533	1.55103	1.62608	0.725483	0.963141	2.37658	0.337725	0.425283
BCMAG-Ab4139	Panthera_leo	1.3682	4.53075	0.605595	0.594381	0.930822	0.863534	1.49156	1.61492	0.796246	0.964466	2.37752	0.314012	0.40373
BCMAG-Ab4156	Panthera_leo	1.35839	4.46593	0.651281	0.502417	0.94901	0.837362	1.45143	1.65612	0.707106	1.06996	2.13062	0.390769	0.418681
BCMAG-Ab4168	Panthera_leo	1.58727	4.7618	0.511153	0.753278	0.981952	0.914695	1.35859	1.58727	0.833987	0.874341	2.28674	0.282479	0.376639
BCMAG-Ab4172	Panthera_leo	1.37758	4.63784	0.757666	0.55103	0.906904	0.792106	1.41201	1.63013	0.734707	1.03318	2.11228	0.332914	0.424752
BCMAG-Ab4186	Panthera_leo	1.44486	4.51519	0.671635	0.564399	0.880463	0.790159	1.33198	1.45615	0.665991	1.06107	2.05441	0.609551	0.338639
BCMAG-Ac2271	Panthera_leo	1.44926	4.50034	0.667424	0.51487	0.962997	0.877185	1.43019	1.60182	0.696027	0.991601	2.24064	0.381385	0.390919
BCMAG-Af1352	Panthera_leo	1.49701	4.72626	0.641574	0.577417	0.91959	0.855432	1.48631	1.64671	0.705732	0.951669	2.1065	0.374252	0.374252
BCMAG-Af1367	Panthera_leo	1.43989	4.77195	0.729176	0.498424	0.876858	0.784557	1.55988	1.52296	0.719946	0.987619	2.60288	0.341513	0.387663
BCMAG-Ab2183	Panthera_leo	1.44884	4.67904	0.546284	0.585474	0.950059	0.831301	1.47259	1.6626	0.748171	0.938183	2.51766	0.391899	0.344396
BRSUVA-LionL-Bullet	Panthera_leo	1.56687	4.8457	0.551307	0.560979	0.918845	0.880156	1.59589	1.61523	0.648027	1.01557	2.35998	0.367538	0.357866
BRSUVA-LionL-noP3	Panthera_leo	1.51359	4.57861	0.614895	0.539216	0.974373	0.889233	1.32439	1.56089	0.737875	1.02167	2.20416	0.359477	0.406777
BRSUVA-LionS-Brown	Panthera_leo	1.38656	4.53384	0.583237	0.594241	0.880357	0.781317	1.30953	1.4746	0.682277	1.02342	2.27792	0.506205	0.429174
BRSUVA-LionS-Red	Panthera_leo	1.55309	4.47657	0.650929	0.570991	1.00494	0.947844	1.34754	1.496	0.765127	1.0392	2.08983	0.342594	0.354014
BMNH-77.857	Panthera_onca	1.52488	4.40137	0.335012	0.5649	0.981932	0.935723	1.49023	1.57109	0.958828	1.05124	2.11404	0.450534	0.381221
BMNH-89.370	Panthera_onca	1.51656	4.39321	0.517557	0.544036	0.999005	0.914751	1.45638	1.49249	0.734208	1.01104	2.11837	0.457376	0.373122
BMNH-1990.542	Panthera_onca	1.52459	4.34509	0.393853	0.564099	0.95287	0.889345	1.5373	1.63894	0.82582	1.0291	1.96926	0.482787	0.393853
BMNH-1935.3.6.2	Panthera_onca	1.50807	4.3427	0.530619	0.538997	0.949528	0.865746	1.49411	1.60582	1.03331	0.921601	2.02473	0.41891	0.335128
BMNH-1926.12.4.29	Panthera_onca	1.57369	4.6109	0.55079	0.590132	0.897001	0.818317	1.51074	1.66811	0.865527	0.912738	2.2189	0.377685	0.346211
BMNH-1845.8.25.21	Panthera_onca	1.53261	4.58309	0.471572	0.565886	0.91367	0.884197	1.6505	1.60629	0.736831	0.943143	2.35786	0.368415	0.412625
BMNH-1936.5.26.3	Panthera_onca	1.54222	4.56241	0.417685	0.621708	0.93176	0.89963	1.42977	1.52616	0.819306	0.996019	2.15269	0.481945	0.353426
BMNH-1934.9.10.64	Panthera_onca	1.57351	4.57891	0.283231	0.62783	0.881164	0.818224	1.51057	1.69939	0.975575	1.05425	2.25012	0.503522	0.361907
BMNH-1874.4.8.2	Panthera_onca	1.52325	4.56974	0.418146	0.57047	0.91096	0.836292	1.52325	1.67258	0.881093	0.985629	2.22513	0.448013	0.358411
BMNH-1928.5.2.139	Panthera_onca	1.64633	4.68457	0.374167	0.66452	0.9429	0.9429	1.55653	1.6164	0.703434	0.972834	2.18513	0.434034	0.3592
BMNH-1870.3.10.19	Panthera_onca	1.38541	4.41223	0.496941	0.573741	0.88847	0.843293	1.56612	1.58118	0.798117	1.00894	2.13835	0.542117	0.331294
BMNH-1845.8.25.22	Panthera_onca	1.60673	4.43146	0.427597	0.549397	0.907023	0.881108	1.59377	1.58081	0.894066	1.0366	2.29347	0.414639	0.336894
BMNH-1884.2.8.1	Panthera_onca	1.51052	4.50251	0.508348	0.553373	0.973124	0.929551	1.45242	1.52504	0.798833	1.0167	2.26578	0.406679	0.348582
BCMAG-Aa1899	Panthera_pardus	1.35297	4.87376	0.59961	0.588848	0.845605	0.768731	1.56821	1.70658	0.876354	0.937852	2.52144	0.322867	0.368991
BCMAG-Ab3871	Panthera_pardus	1.40697	4.52513	0.399277	0.608421	0.83658	0.817566	1.54007	1.54007	0.83658	0.931645	2.35763	0.456316	0.475329
BCMAG-Ab4129	Panthera_pardus	1.55966	4.64508	0.457726	0.66116	0.915453	0.891719	1.44099	1.52575	0.915453	0.915453	2.0852	0.389915	0.372962
BCMAG-Ab4133	Panthera_pardus	1.38393	4.62846	0.584324	0.55357	0.953371	0.891863	1.46081	1.66071	0.861109	0.922617	2.07589	0.369047	0.384424
BCMAG-Ab4140	Panthera_pardus	1.42943	4.56442	0.568522	0.565273	0.909635	0.844661	1.4944	1.68932	0.893392	0.942122	2.30658	0.389844	0.32487
BCMAG-Ad2710	Panthera_pardus	1.33733	4.85765	0.727665	0.609665	0.884998	0.806331	1.475	1.57333	0.806331	1.02266	2.57633	0.294999	0.334332
BCMAG-Af1357	Panthera_pardus	1.28989	4.75867	0.470637	0.592654	0.923844	0.871551	1.55136	1.60365	0.85412	1.011	2.40548	0.383482	0.366051
BCMAG-Af1368	Panthera_pardus	1.52523	5.04671	0.560745	0.762614	0.953267	0.863548	1.52523	1.70467	0.807474	0.874763	2.37756	0.269158	0.314017
BCMAG-Af1375	Panthera_pardus	1.36437	4.8373	0.496133	0.702856	0.971595	0.868234	1.52974	1.65378	0.785545	0.909578	2.31529	0.330756	0.3721
BCMAG-Af1416	Panthera_pardus	1.42421	4.73341	0.335109	0.712107	1.00533	0.900605	1.40327	1.52893	0.879661	0.963438	2.15726	0.439831	0.397942
BCMAG-Ab2185	Panthera_pardus	1.49151	4.83119	0.534998	0.651725	0.907875	0.891663	1.4753	1.54015	0.859239	0.907875	2.51287	0.340453	0.324241
BRSUVA-LeopardL	Panthera_pardus	1.35112	4.69337	0.462226	0.60445	0.924452	0.782229	1.61779	1.74224	0.888897	0.924452	2.4178	0.373337	0.373337
BCMAG-Ab2866	Panthera_tigris	1.56039	4.31109	0.600152	0.530134	0.860217	0.800202	1.26032	1.52038	0.700177	1.15029	2.18055	0.560141	0.360091
BCMAG-Ab4126	Panthera_tigris	1.44731	4.39289	0.601346	0.519808	0.896923	0.784808	1.34539	1.52885	0.682885	1.16192	2.27289	0.540193	0.356731
BCMAG-Ab4130	Panthera_tigris	1.50585	4.64518	0.574266	0.599789	0.855019	0.77845	1.50585	1.65899	0.714642	0.944349	2.36087	0.472174	0.331798
BCMAG-Ab4132	Panthera_tigris	1.46014	4.57193	0.586451	0.59842	0.885661	0.801882	1.4003	1.5918	0.765977	1.07716	2.20218	0.442831	0.335115
BCMAG-Ab4136	Panthera_tigris	1.61324	4.66048	0.537748	0.746872	0.926121	0.911183	1.34437	1.59831	0.687122	0.926121	2.06137	0.358498	0.388373
BCMAG-Ab4138	Panthera_tigris	1.47764	4.48301	0.538463	0.626119	0.951701	0.901612	1.44007	1.69052	0.701254	0.989268	2.22898	0.425761	0.325582
BCMAG-Ab4143	Panthera_tigris	1.46753	4.61563	0.473398	0.639087	0.875787	0.852117	1.4912	1.6924	0.603583	1.04148	2.27231	0.437893	0.414223
BCMAG-Ab4148	Panthera_tigris	1.60095	4.83195	0.436622	0.640379	0.902352	0.873244	1.46996	1.58639	0.829582	1.00423	2.28499	0.378406	0.349298
BCMAG-Ab4149	Panthera_tigris	1.48469	4.76126	0.627155	0.563159	0.895935	0.806342	1.47189	1.58709	0.627155	0.998328	2.38063	0.460767	0.345575
BCMAG-Ab4151	Panthera_tigris	1.39525	4.27296	0.561976	0.523219	0.862343	0.823586	1.4437	1.64717	0.755761	1.20147	2.31573	0.571665	0.280988
BCMAG-Ab4153	Panthera_tigris	1.36528	4.63366	0.51715	0.579208	0.889498	0.806754	1.43768	1.60316	0.713667	1.14807	2.45129	0.465435	0.341319
BCMAG-Ab4154	Panthera_tigris	1.49773	4.41495	0.447084	0.625917	0.882991	0.827105	1.4642	1.68774	0.69298	1.14006	2.32484	0.502969	0.324136
BCMAG-Ab4155	Panthera_tigris	1.61119	4.62288	0.582507	0.619689	0.904746	0.892352	1.4005	1.5988	0.718839	1.0039	2.23088	0.396601	0.322238
BCMAG-Ab4158	Panthera_tigris	1.41702	4.32091	0.548845	0.528887	0.838236	0.788341	1.41702	1.69643	0.608719	1.07773	2.34507	0.678572	0.339286
BCMAG-Ab4173	Panthera_tigris	1.42513	4.50258	0.537005	0.537005	0.929432	0.898451	1.42513	1.44578	0.784854	1.05336	2.27194	0.506024	0.330465
BCMAG-Ab4175	Panthera_tigris	1.53645	4.30587	0.436277	0.512152	0.834617	0.79668	1.53645	1.76408	0.768227	1.15708	2.38056	0.550089	0.322466
BCMAG-Ab4184	Panthera_tigris	1.52544	4.72001	0.574803	0.552695	0.773773	0.784827	1.52544	1.61387	0.607964	1.03907	2.32132	0.563749	0.353725
BCMAG-Ab4187	Panthera_tigris	1.47627	4.46926	0.535907	0.515684	0.889807	0.83925	1.57739	1.68861	0.707801	1.07181	2.37619	0.444904	0.343789
BCMAG-Ab4188	Panthera_tigris	1.48426	4.60121	0.647678	0.634185	0.877064	0.809598	1.33584	1.51125	0.728638	1.012	2.22639	0.431785	0.350826
BCMAG-Ab4189	Panthera_tigris	1.3317	4.48408	0.488984	0.582619	0.842717	0.790697	1.48776	1.64382	0.790697	1.16524	2.23684	0.509792	0.343329
BCMAG-Ab2184	Panthera_tigris	1.54882	4.57028	0.520504	0.646186	0.914055	0.863274	1.39647	1.5996	0.672846	0.990227	2.33592	0.482418	0.31738
BMNH-10.3.10.8	Panthera_tigris	1.42327	4.37602	0.573556	0.591612	0.860333	0.796605	1.43389	1.6357	0.711634	1.08338	2.26236	0.467342	0.361128
BRSUVA-Tiger	Panthera_tigris	1.47611	4.43857	0.492036	0.55354	0.850812	0.809809	1.4146	1.66062	0.656048	1.15833	2.26542	0.676549	0.297272
BMNH-75.2283	Panthera_uncia	1.59	4.9833	0.368415	0.75816	0.988904	0.988904	1.55122	1.62878	0.69805	0.930733	2.46257	0.310244	0.368415
BMNH-81.1498	Panthera_uncia	1.55317	4.91137	0.356809	0.797573	1.00746	1.07043	1.46921	1.6791	0.713618	0.923505	2.32975	0.33582	0.33582
BMNH-1938.6.28.3	Panthera_uncia	1.66103	4.89332	0.404035	0.760933	0.965195	0.987642	1.50391	1.66103	0.650946	0.920303	2.37932	0.291803	0.404035
BMNH-84.2090	Panthera_uncia	1.53403	4.85776	0.426119	0.718011	0.958768	0.958768	1.53403	1.64056	0.724403	0.89485	2.38627	0.319589	0.383507
BMNH-47.37	Panthera_uncia	1.63966	5.04708	0.358676	0.837764	0.999168	0.999168	1.4347	1.63966	0.717352	0.87107	2.48511	0.307436	0.358676
BMNH-56.10.1.5	Pardofelis_marmorata	1.37905	4.6543	0.387859	0.805884	0.948099	0.948099	1.33596	1.72382	0.646431	0.948099	2.32715	0.435264	0.387859
BMNH-26.10.4.47	Pardofelis_marmorata	1.35356	4.87281	0.451187	0.789576	0.902373	0.902373	1.35356	1.66939	0.67678	0.947492	2.39129	0.428627	0.351925
BMNH-55.1645	Pardofelis_marmorata	1.39404	4.47561	0.440224	0.641993	0.953818	0.880448	1.43073	1.79758	0.660336	1.02719	2.42123	0.396202	0.403539
BMNH-61.1277	Pardofelis_marmorata	1.30064	4.76901	0.346837	0.763042	0.910448	0.867093	1.56077	1.64748	0.737029	1.04051	2.16773	0.424876	0.424876
BMNH-95.7.30.4	Pardofelis_marmorata	1.4274	4.63905	0.35685	0.753846	0.892125	0.892125	1.4274	1.96268	0.624488	1.07055	2.31953	0.379153	0.42822
BMNH-32.2.9.1	Pardofelis_marmorata	1.21324	4.76628	0.433298	0.762605	0.866597	0.866597	1.47321	1.86318	0.649948	0.953257	2.29648	0.428965	0.415967
RCSOM-A125.1	Pardofelis_temminckii	1.42433	4.58633	0.56973	0.643795	0.940055	0.911568	1.36735	1.62373	0.712163	0.997028	2.30741	0.427298	0.313352
BMNH-23.1.7.7	Pardofelis_temminckii	1.42053	4.68248	0.497185	0.68922	0.920713	0.841795	1.47314	1.68359	0.736571	0.999631	2.26232	0.394591	0.34724
BMNH-1868.9.12.1	Pardofelis_temminckii	1.40663	4.51745	0.538307	0.646509	0.973821	0.91972	1.48778	1.59598	0.730366	0.973821	2.5157	0.378708	0.313787
BMNH-8.8.7.1	Pardofelis_temminckii	1.36359	4.44343	0.564246	0.585405	0.869878	0.799348	1.43412	1.5987	0.705307	1.08147	2.18645	0.470205	0.399674
BMNH-50.510	Pardofelis_temminckii	1.24586	4.65557	0.590143	0.727843	0.885215	0.786858	1.50814	1.54093	0.721286	0.950786	2.45893	0.393429	0.373757
BMNH-32.3.1.33	Pardofelis_temminckii	1.35153	4.4953	0.646382	0.64932	0.940193	0.852049	1.41029	1.64534	0.675763	1.02834	2.20358	0.411334	0.334944
BMNH-1938.11.30.27	Prionailurus_bengalensis	1.21756	4.77659	0.580683	0.650927	0.899123	0.777366	1.40488	1.63903	0.688391	1.03024	2.29464	0.515122	0.337171
BMNH-36.5.18.6	Prionailurus_bengalensis	1.20615	4.73184	0.542769	0.672663	0.858225	0.779361	1.39172	1.57728	0.714415	1.11337	2.27314	0.463906	0.389681
BMNH-27.12.1.66	Prionailurus_bengalensis	1.13335	4.76007	0.566675	0.653566	0.876458	0.831124	1.43558	1.58669	0.702678	1.09557	2.45559	0.491119	0.324894
BMNH-27.12.1.72	Prionailurus_bengalensis	1.14775	4.71397	0.569775	0.680451	0.901803	0.815722	1.3937	1.55766	0.746037	1.02478	2.62343	0.422208	0.352523
BMNH-1938.8.8.2	Prionailurus_bengalensis	1.23004	4.68953	0.515079	0.638083	0.92253	0.845652	1.46067	1.65287	0.71496	1.07628	2.30632	0.461265	0.342105
BMNH-8.2.26.19	Prionailurus_bengalensis	1.32296	4.67445	0.520363	0.723217	0.92166	0.851102	1.41115	1.58755	0.714397	1.10246	2.51362	0.383658	0.32192
BMNH-70.7.18.25	Prionailurus_bengalensis	1.20362	4.7682	0.569406	0.74532	0.865683	0.824019	1.3888	1.57397	0.689768	1.11104	2.40725	0.416639	0.34257
BMNH-75.2246	Prionailurus_planiceps	1.23607	5.02668	0.432624	0.683958	0.906451	0.824046	1.60689	1.60689	0.683958	0.947653	2.67815	0.453225	0.35846
BMNH-92.10.1.2	Prionailurus_planiceps	1.35948	4.87146	0.407843	0.645751	0.906317	0.830791	1.66158	1.51053	0.755265	0.981844	2.5679	0.430501	0.37008
BMNH-72.8.19.18	Prionailurus_planiceps	1.31891	5.19808	0.434466	0.605149	0.853415	0.775832	1.82321	1.74562	0.814624	0.930999	2.48266	0.391795	0.356883
BMNH-29.3.9.1	Prionailurus_planiceps	1.25658	5.19385	0.44399	0.678551	0.837718	0.80002	1.63355	1.63355	0.707871	0.921489	2.76447	0.423047	0.372784
BMNH-60.5.4.51	Prionailurus_planiceps	1.41966	5.23498	0.465824	0.73201	0.887285	0.84292	1.55275	1.46402	0.709828	0.931649	2.44003	0.385969	0.37266
BMNH-79.11.21.627	Prionailurus_planiceps	1.4161	5.03503	0.51137	0.64118	0.904732	0.82606	1.61278	1.57345	0.735586	0.904732	2.2815	0.393362	0.377627
BMNH-61.1276	Prionailurus_planiceps	1.48371	4.86326	0.370927	0.684154	0.906709	0.865495	1.64856	1.60735	0.741853	0.947924	2.22556	0.457476	0.366805
RCSOM-A124.6	Prionailurus_rubiginosus	1.12182	4.58925	0.509917	0.693487	0.871958	0.826066	1.42777	1.58074	0.764876	1.12182	2.29463	0.560909	0.30595
RCSOM-A124.61	Prionailurus_rubiginosus	1.09703	4.6873	0.548514	0.693123	0.932474	0.86765	1.44608	1.59568	0.698109	1.14689	2.29379	0.498649	0.29919
RCSOM-A124.62	Prionailurus_rubiginosus	1.08574	4.63906	0.493517	0.611961	0.86859	0.804433	1.48055	1.67796	0.740275	1.08574	2.41823	0.493517	0.394814
RCSOM-A124.63	Prionailurus_rubiginosus	1.12557	4.61485	0.450229	0.742879	0.92297	0.883575	1.46325	1.63208	0.787902	1.06929	2.30743	0.450229	0.337672
RCSOM-A124.64	Prionailurus_rubiginosus	1.1065	4.70263	0.553251	0.697096	0.940527	0.890734	1.38313	1.60443	0.663901	1.05118	2.32365	0.497926	0.331951
BMNH-20.2.8.5	Prionailurus_rubiginosus	1.17478	4.64571	0.443212	0.715547	0.923803	0.843704	1.49517	1.65537	0.630108	1.17478	2.34956	0.52865	0.325734
BMNH-15.3.1.49	Prionailurus_rubiginosus	1.12216	4.59064	0.540675	0.708999	0.907926	0.831416	1.4282	1.53021	0.734502	1.02014	2.1423	0.49987	0.382553
BMNH-66.5.8.1	Prionailurus_rubiginosus	1.03489	4.50176	0.481222	0.714072	0.900352	0.838259	1.44884	1.55233	0.770991	1.13838	2.22501	0.527792	0.357036
BMNH-34.4.17.2	Prionailurus_rubiginosus	1.17977	4.71909	0.632787	0.723951	0.884829	0.820478	1.34065	1.55515	0.670325	1.07252	2.35954	0.482634	0.316393
RCSOM-A124.71	Prionailurus_viverrinus	1.22586	4.67361	0.510777	0.577178	0.919398	0.86832	1.58341	1.55787	0.817243	1.09817	2.32403	0.43416	0.332005
RCSOM-A124.7	Prionailurus_viverrinus	1.20918	4.62513	0.513903	0.649936	0.846429	0.816199	1.51148	1.51148	0.876658	1.08827	2.35791	0.453444	0.332526
RCSOM-G16.31	Prionailurus_viverrinus	1.14805	4.45551	0.492019	0.590423	0.874701	0.820032	1.50339	1.55806	0.847367	1.14805	2.18675	0.492019	0.382682
BMNH-75.2286	Prionailurus_viverrinus	1.21473	4.32444	0.534482	0.54177	0.923196	0.874607	1.50627	1.57915	0.898901	1.02037	2.21081	0.485893	0.347413
BMNH-14.1.19.1	Prionailurus_viverrinus	1.24735	4.58265	0.43386	0.612828	0.894837	0.867721	1.4914	1.54563	0.840605	1.05753	2.30488	0.542326	0.330819
BMNH-43.1.12.120	Prionailurus_viverrinus	1.27569	4.63886	0.524771	0.585656	0.927772	0.869786	1.50763	1.53662	0.811801	1.04374	2.29044	0.431994	0.350814
RCSOM-A123.4	Puma_concolor	1.22825	4.54785	0.381754	0.597528	0.879693	0.796703	1.6764	1.6266	0.912889	1.09547	2.60588	0.431548	0.365156
RCSOM-G98.12	Puma_concolor	1.46638	4.4854	0.452852	0.677122	0.905705	0.841012	1.42325	1.55264	0.797883	1.03509	2.2427	0.388159	0.409724
RCSOM-A123.31	Puma_concolor	1.47204	4.43601	0.258602	0.626611	0.994621	0.934944	1.5715	1.8301	0.815589	1.07419	2.42688	0.556988	0.298386
BMNH-1837.3.15.17	Puma_concolor	1.37789	4.48799	0.364157	0.68304	0.925155	0.826734	1.53536	1.67315	0.866103	1.06294	2.4802	0.433051	0.334631
BMNH-1858.5.4.56	Puma_concolor	1.51341	4.78564	0.42948	0.676943	0.899864	0.818058	1.4725	1.53386	0.858961	1.02257	2.20876	0.449932	0.327223
BMNH-1850.11.22.46	Puma_concolor	1.37436	4.34541	0.444647	0.618463	0.970139	0.889294	1.47542	1.65732	0.727604	1.03077	2.28387	0.50528	0.333485
BMNH-1901.11.14.1	Puma_concolor	1.46445	4.3781	0.396622	0.597984	0.945791	0.884772	1.43394	1.63225	0.74748	1.20512	2.2882	0.533914	0.305094
BMNH-11.8.21.1	Puma_concolor	1.39163	4.62797	0.388361	0.631087	0.889995	0.825268	1.61817	1.63435	0.647269	1.16508	2.55671	0.550179	0.307453
BMNH-1901.3.21.15	Puma_concolor	1.2421	4.43362	0.448538	0.622777	0.879824	0.810818	1.39737	1.62164	0.707309	1.1731	2.50146	0.534795	0.36228
BMNH-1926.12.4.100	Puma_concolor	1.31755	4.61144	0.439184	0.585579	0.86007	0.84177	1.50055	1.70184	0.805172	1.17116	2.34232	0.475783	0.329388
BMNH-1926.1.12.3	Puma_concolor	1.29662	4.55977	0.432206	0.652631	0.864412	0.821191	1.42628	1.70721	0.799581	1.10213	2.29069	0.497037	0.345765
BMNH-52.1084.a	Puma_concolor	1.45046	4.42575	0.371912	0.645268	0.966972	0.873994	1.48765	1.63641	0.706633	1.22731	2.529	0.483486	0.29753
BMNH-40.692	Puma_concolor	1.36763	4.55876	0.438343	0.643487	0.894219	0.789017	1.47283	1.64817	0.771483	1.08709	2.38458	0.526011	0.315607
BMNH-1908.6.17.11	Puma_yagouaroundi	1.39601	4.73093	0.542894	0.70964	0.969453	0.891897	1.47357	1.62868	0.853119	1.00823	2.28791	0.310225	0.310225
BMNH-1934.9.2.33	Puma_yagouaroundi	1.3444	4.70539	0.434952	0.707786	0.948986	0.790822	1.58164	1.66073	0.869904	1.14669	2.60971	0.316329	0.316329
BMNH-1934.9.2.32	Puma_yagouaroundi	1.20184	4.54446	0.45069	0.683546	0.90138	0.826265	1.53986	1.61497	1.01405	1.05161	2.66658	0.30046	0.375575
BMNH-1926.1.12.8	Puma_yagouaroundi	1.21575	4.73273	0.390776	0.742474	0.955229	0.86839	1.51968	1.64994	0.781551	1.17233	2.60517	0.347356	0.347356
BMNH-1926.1.12.7	Puma_yagouaroundi	1.30163	4.78813	0.464867	0.790273	0.929733	0.83676	1.3946	1.62703	0.743787	1.11568	2.46379	0.325407	0.371893
BMNH-1923.8.9.8	Puma_yagouaroundi	1.35355	4.65283	0.338387	0.8079	0.930565	0.845969	1.43815	1.64964	0.845969	1.22665	2.32641	0.380686	0.338387
BMNH-1886.1.19.1	Puma_yagouaroundi	1.31284	4.75903	0.410261	0.750779	0.943601	0.861549	1.51797	1.60002	0.820523	1.18976	2.5026	0.328209	0.328209
BMNH-1926.1.8.9	Puma_yagouaroundi	1.43284	4.78869	0.30165	0.788059	0.942655	0.867242	1.65907	1.50825	0.904949	1.2066	2.4132	0.30165	0.377062
MS.Jaguarundi	Puma_yagouaroundi	1.19888	4.72057	0.47955	0.636903	0.936622	0.861692	1.46113	1.57352	0.749297	1.12395	2.39775	0.412114	0.374649
UoP-Jaguar	Anomalous_Jaguar	1.5812	4.57112	0.388114	0.602295	0.948722	0.905598	1.5812	1.5812	0.934348	0.991846	2.05556	0.402488	0.359364
UoP-Tiger	Peruvian_Tiger	1.51829	4.45998	0.506097	0.58043	0.88567	0.838223	1.40758	1.50248	0.901485	1.01219	2.08765	0.442835	0.379573
